# Supplementary material for: RNA m6A methylation modulates airway inflammation in allergic asthma via PTX3-dependent macrophage homeostasis
Source: PubMed Central journal article supplement (PMC10643624; doi:10.1038/s41467-023-43219-w), 2023-11-13
Supplement: 41467_2023_43219_MOESM1_ESM.pdf [file 41467_2023_43219_MOESM1_ESM.pdf]

1 SUPPLEMENTARY INFORMATION

2 RNA m<sup>6</sup>A Methylation Modulates Airway Inflammation in Allergic Asthma via  
3 PTX3-dependent Macrophage Homeostasis

4  
5 **Authors:** Xiao Han<sup>1,2#\*</sup>, Lijuan Liu<sup>3#</sup>, Saihua Huang<sup>1,2#</sup>, Wenfeng Xiao<sup>1,2#</sup>, Yajing  
6 Gao<sup>1,2#</sup>, WeiTao Zhou<sup>3</sup>, Caiyan Zhang<sup>4</sup>, Hongmei Zheng<sup>3</sup>, Lan Yang<sup>1,2</sup>, Xueru Xie<sup>1,2</sup>,  
7 Qiuyan Liang<sup>1,2</sup>, Zikun Tu<sup>1,2</sup>, Hongmiao Yu<sup>1,2</sup>, Jinrong Fu<sup>5</sup>, Libo Wang<sup>3</sup>, Xiaobo Zhang<sup>3</sup>,  
8 Liling Qian<sup>3,6\*</sup>, Yufeng Zhou<sup>1,2\*</sup>

9 # These authors contributed equally to this work.

10 \* Corresponding author: Yufeng Zhou, M.D., Ph.D., 399 Wanyuan Rd, Minhang,  
11 Shanghai 201102, China, e-mail: [yfzhou1@fudan.edu.cn](mailto:yfzhou1@fudan.edu.cn). TEL: 86-21-64932907; Or  
12 Liling Qian, M.D., Ph.D., e-mail: [llqian@126.com](mailto:llqian@126.com). TEL: 86-21-52971002; Or Xiao  
13 Han, Ph.D., e-mail: [sqhx12@126.com](mailto:sqhx12@126.com). TEL: 86-21-64932897.

14 .

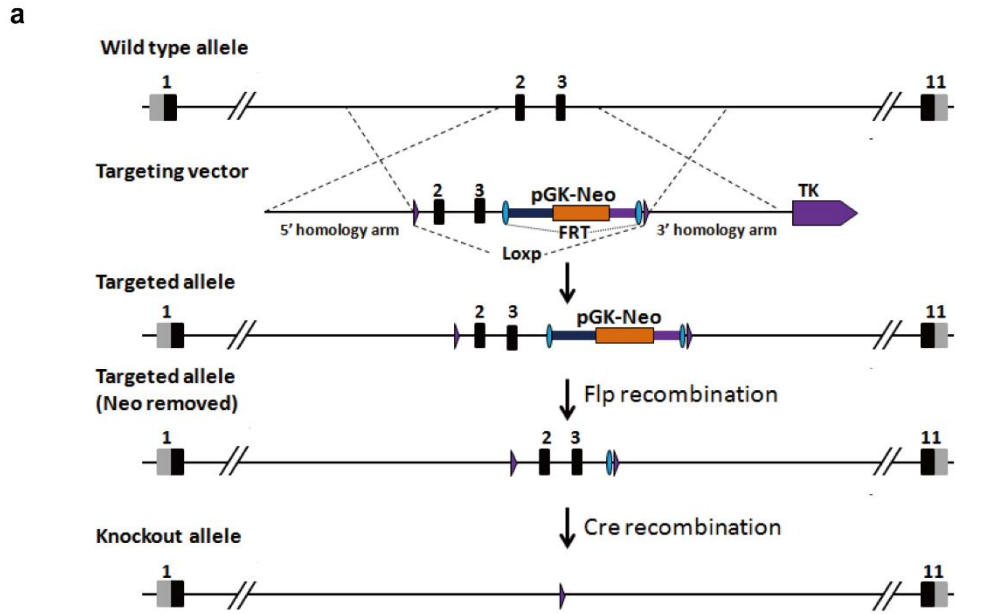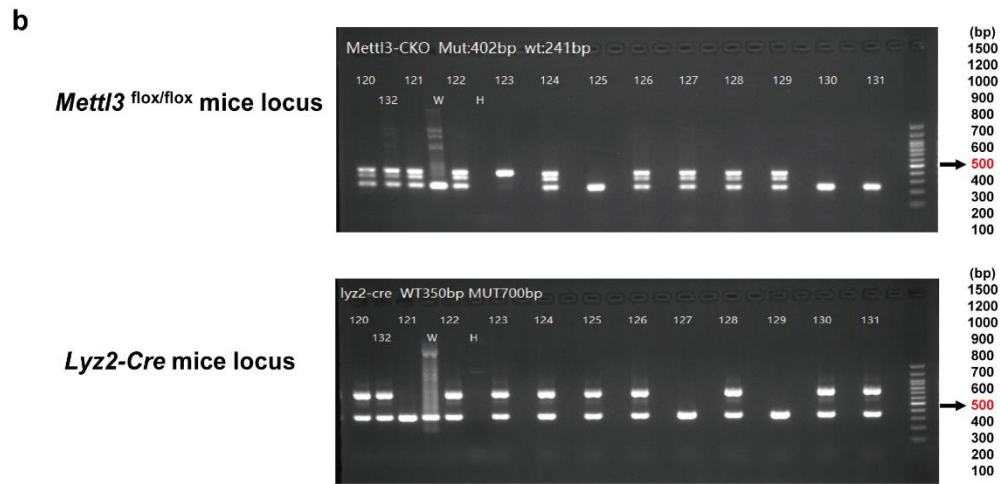

20

21 **Supplementary Figure 1 Generation of *Mettl3* KO mice.** (a) Schematic diagram of  
 22 the targeting strategy for *Mettl3* depletion in the myeloid compartment, using a LoxP  
 23 targeting system and homologous recombination. (b) Gel image of PCR products  
 24 amplified using genotyping primers to identify *Mettl3*<sup>fl/fl</sup>*Lyz2*<sup>Cre/+</sup> (KO) mice. W, wide-  
 25 type (WT); H, ddH<sub>2</sub>O; 122, *Mettl3*<sup>fl/-</sup>*Lyz2*<sup>Cre/+</sup> heterozygote (HE); 123, *Mettl3*<sup>fl/fl</sup>*Lyz2*<sup>Cre/+</sup>  
 26 (KO).

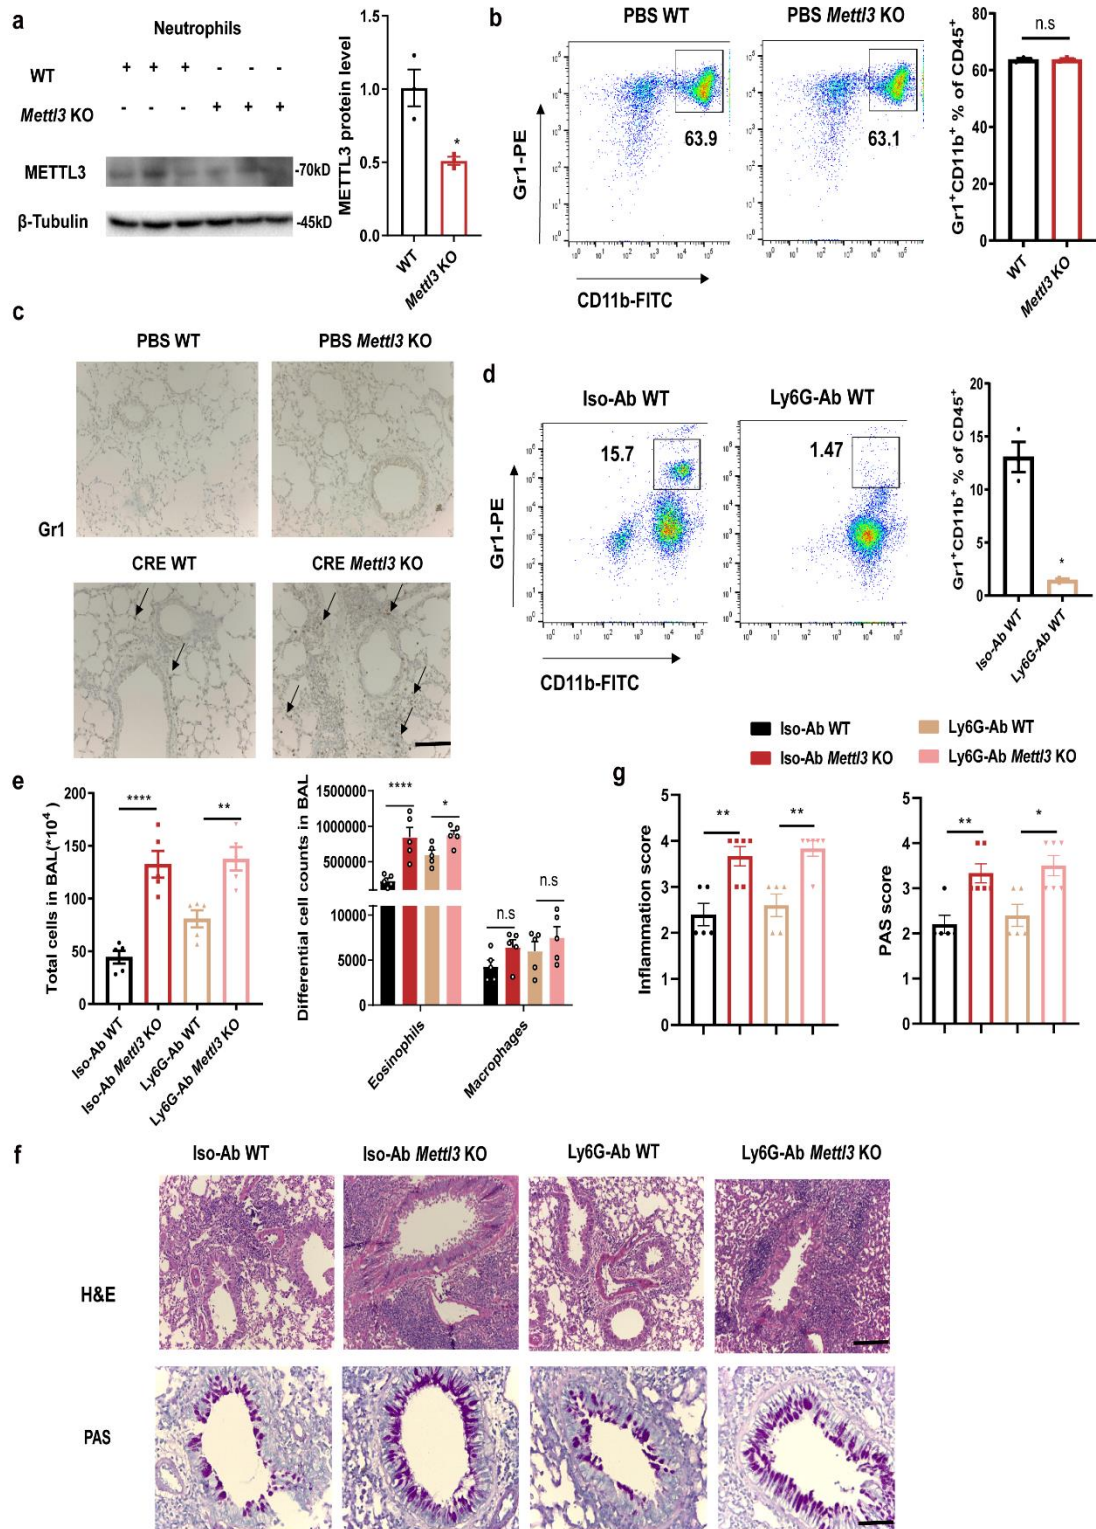

27

28 **Supplementary Figure 2 Depletion of neutrophils does not reduce the differences**

29 **in airway inflammation between *Mettl3* KO and WT mice.** (a) Western blot showing

30 reduced METTL3 protein levels in neutrophils purified from the bone marrow of the

31 experimental mice (n=3 animals). (b) The percentage of neutrophils from the bone

32 marrow was detected in *Mettl3* KO and WT mice (n=3 animals). (c) Representative  
33 images of Gr1 expression in lung tissues using IHC. Scale bars: 200  $\mu$ m. Every 72 h  
34 during CRE treatment, mice were i.p. injected with 200  $\mu$ g anti-Ly6G mAb or isotype  
35 control mAb, (d) Flow cytometry analysis of the efficiency of neutrophils depletion in  
36 BALF (n=3 animals). (e) Total and differential BALF cell numbers, and (f)  
37 histopathological changes in the lung tissues were examined (n=5 animals). Scale bars:  
38 200  $\mu$ m and 100  $\mu$ m, respectively. (g) Calculated inflammation and PAS scores (n=5  
39 animals for WT groups and n=6 animals for KO groups). Statistical analysis of the data  
40 was performed using two-sided unpaired t test with Welch's correction (d) or not (a, b),  
41 1-way ANOVA (e left, g), and 2-way ANOVA (e right) followed by either Tukey's or  
42 Sidak's multiple comparison tests. Data are presented as means  $\pm$  SEM from one of  
43 three independent experiments. \* $P$  < 0.05, \*\* $P$  < 0.01, \*\*\*\* $P$  < 0.0001; n.s = not  
44 significant.

45

46

47

48

49

50

51

52

53

54

55

56

57

58

59

60

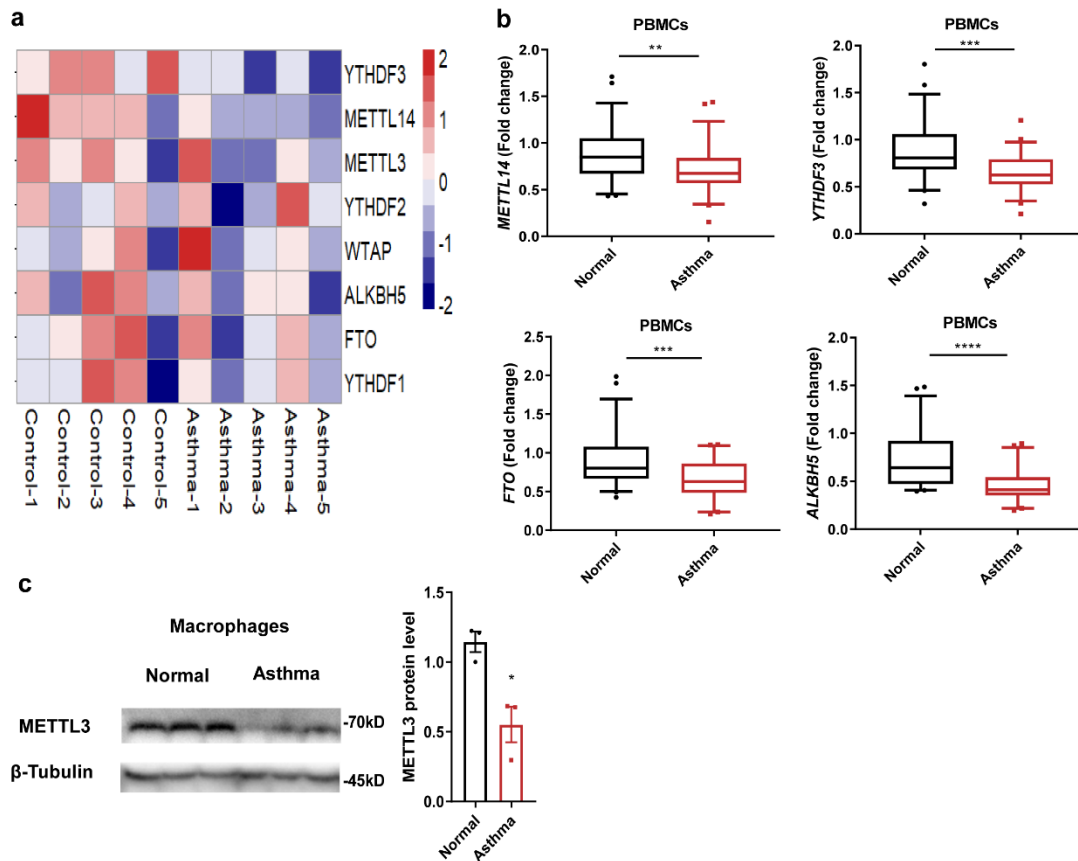

61

62 **Supplementary Figure 3 Expression of m<sup>6</sup>A modification-associated genes in**

63 **childhood allergic asthma patients.** (a) Heatmap profiling the expression of m<sup>6</sup>A

64 modulators in PBMCs of human asthma patients from the GEO database (GSE27876,

65 <https://www.ncbi.nlm.nih.gov/geo/query/acc.cgi?acc=GSE27876>).

66 analysis of m<sup>6</sup>A ‘writer’ (*METTL14*), ‘eraser’ (*FTO* and *ALKBH5*), and ‘reader’

67 (*YTHDF3*) expression in PBMCs from 55 childhood allergic asthma patients and 50

68 healthy controls. The detailed minimum, median, maximum, 25th, 75th percentile (box),

69 and 5th and 95th percentile (whiskers) of box plots were provided in the Source data

70 file. (c) The METTL3 protein levels were determined in monocyte-derived

71 macrophages from children with allergic asthma and healthy controls by Western blot

72 (n=3 patients). Statistical analysis of the data was performed using Mann-Whitney test

73 (b left), or two-sided unpaired t test with Welch’s correction (b right) or not (c). Data

74 are presented as means ± SEM. \**P* < 0.05, \*\**P* < 0.01, \*\*\**P* < 0.001, \*\*\*\**P* < 0.0001.

75

76

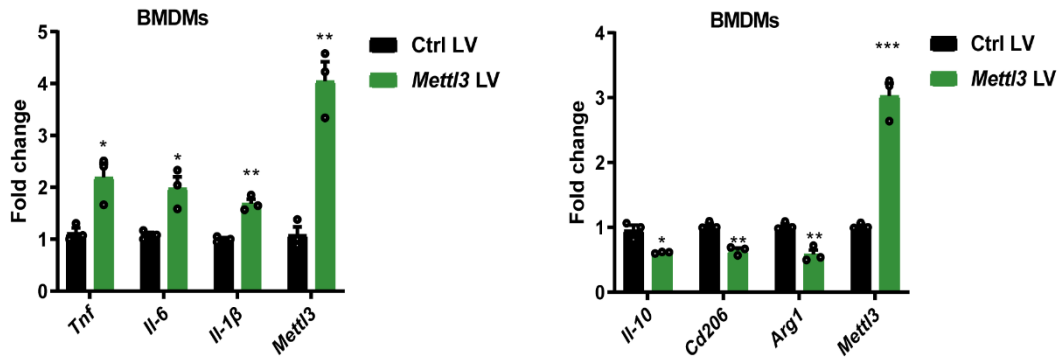

77

78 **Supplementary Figure 4 Overexpressed METTL3 enhances M1 and inhibits M2**

79 **macrophage activation in BMDMs.** Overexpression of *Mett13* in BMDMs with *Mett13*

80 LV or Ctrl LV. M1 (right)-and M2 (left)-associated markers were quantified by RT-

81 qPCR in macrophages stimulated with LPS or IL-4 (n=3 cells), respectively. Statistical

82 analysis of the data was performed using two-sided unpaired t test. Data are presented

83 as means  $\pm$  SEM from one of three independent experiments. \* $P < 0.05$ , \*\* $P < 0.01$ ,

84 \*\*\* $P < 0.001$ .

85

86

87

88

89

90

91

92

93

94

95

96

97

98

99

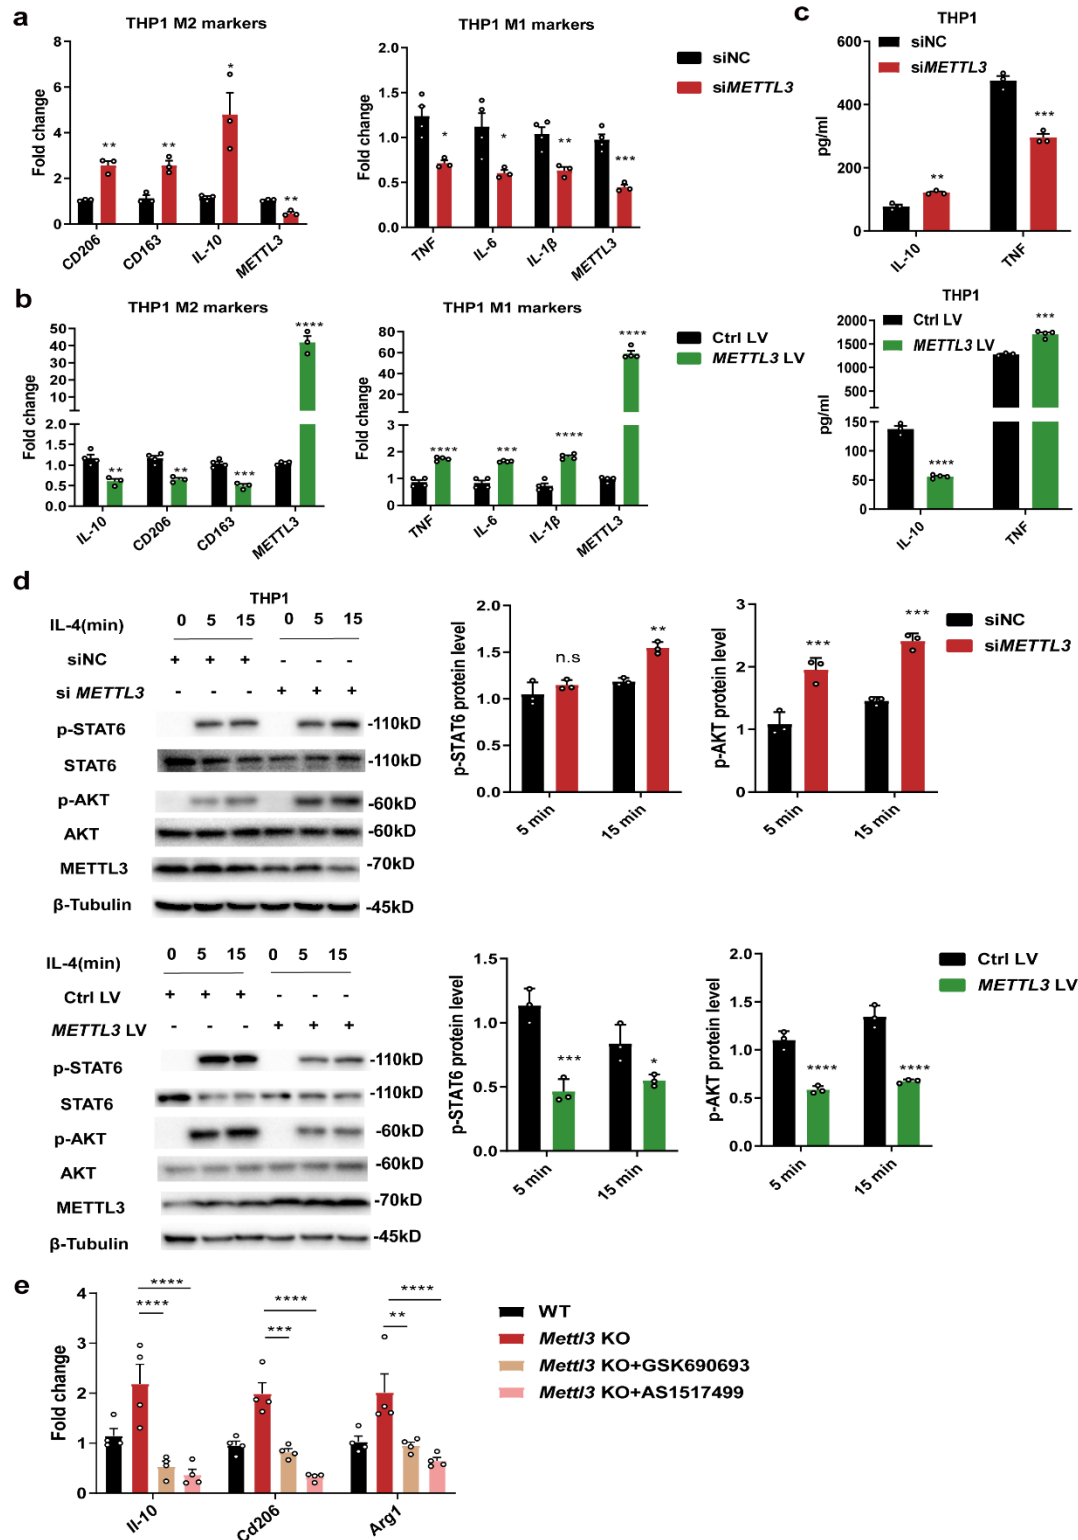

100

101 **Supplementary Figure 5 METTL3 inhibits M2 macrophage activation via the**

102 **PI3K/AKT and JAK/STAT6 signaling pathways. (a) Knockdown of *METTL3* in**

103 **human THP1-derived macrophages using siRNAs pools (200 nM) (n=3 cells), (b)**

104 **Overexpression of *METTL3* in THP1-derived macrophages with *METTL3* LV or Ctrl**

105 LV (n=4 cells). M1 and M2-associated markers were quantified by RT-qPCR in  
106 macrophages stimulated with LPS or IL-4, respectively. NC, negative control. (c)  
107 ELISA showing the levels of TNF and IL-10 secretion in THP1-derived macrophages  
108 with *METTL3* knockdown (top) (n=3 cells) or overexpression (bottom) (n=3 cells for  
109 control group and n=4 cells for overexpression group). (d) Western blot analysis of the  
110 levels of AKT phosphorylation (p-AKT), AKT, STAT6, and p-STAT6 in THP1-derived  
111 macrophages with *METTL3* knockdown (top) or overexpression (bottom), following  
112 IL-4 stimulation (n=3 cells). (e) RT-qPCR detected M2-associated markers expression  
113 in BMDMs from WT and *Mettl3* KO mice treated with the AKT inhibitor GSK690693  
114 (100 nM), or the STAT6 inhibitor AS1517499 (100 nM) (n=4 cells). Statistical analysis  
115 of the data was performed using two-sided unpaired t test (a-c), and 2-way ANOVA (d-  
116 e) followed by either Tukey's or Sidak's multiple comparison tests. Data are presented  
117 as means  $\pm$  SEM from one of three independent experiments. \* $P < 0.05$ , \*\* $P < 0.01$ ,  
118 \*\*\* $P < 0.001$ , \*\*\*\* $P < 0.0001$ ; n.s = not significant.

119  
120  
121  
122  
123  
124  
125  
126  
127  
128  
129  
130  
131  
132  
133



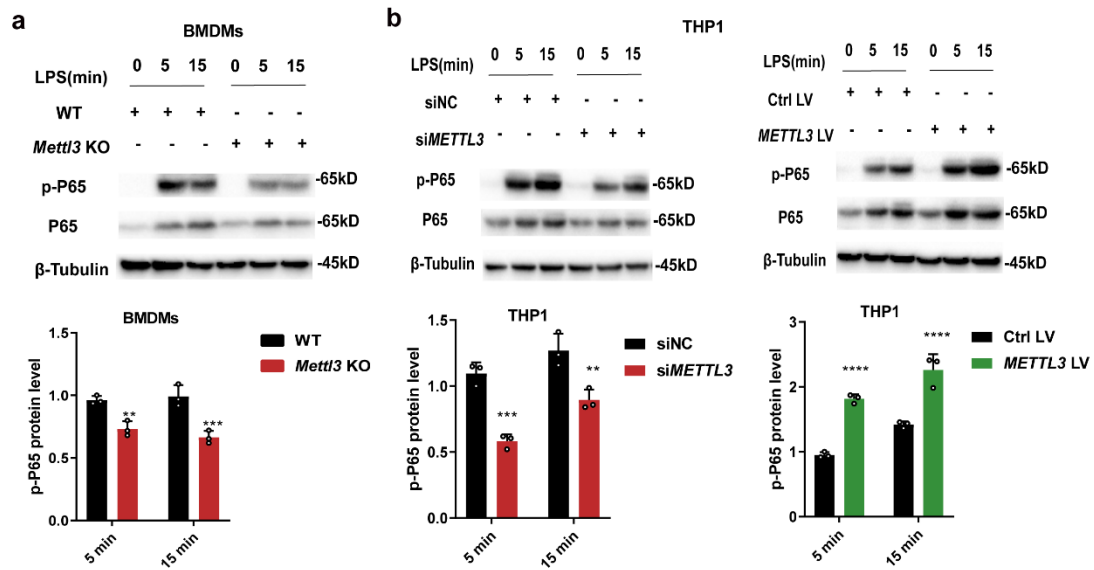

134

135 **Supplementary Figure 6 METTL3 promotes M1 macrophage activation through**

136 **the NF- $\kappa$ B signaling pathway.** (a) BMDMs from WT and *Mettl3* KO mice (n=3

137 animals), (b) human THP1-derived macrophages transfected with *METTL3* or control

138 siRNAs (200 nM, left), and *METTL3*-overexpressing (*METTL3* LV, right) THP1-

139 derived macrophages (n=3 cells), stimulated by LPS. Levels of P65 phosphorylation

140 (p-P65) and total P65 were examined by Western blot. Statistical analysis of the data

141 was performed using 2-way ANOVA followed by Sidak's multiple comparison tests.

142 Data are presented as means  $\pm$  SEM from one of three independent experiments. \*\**P* <

143 0.01, \*\*\**P* < 0.001, \*\*\*\**P* < 0.0001.

144

145

146

147

148

149

150

151

152

153

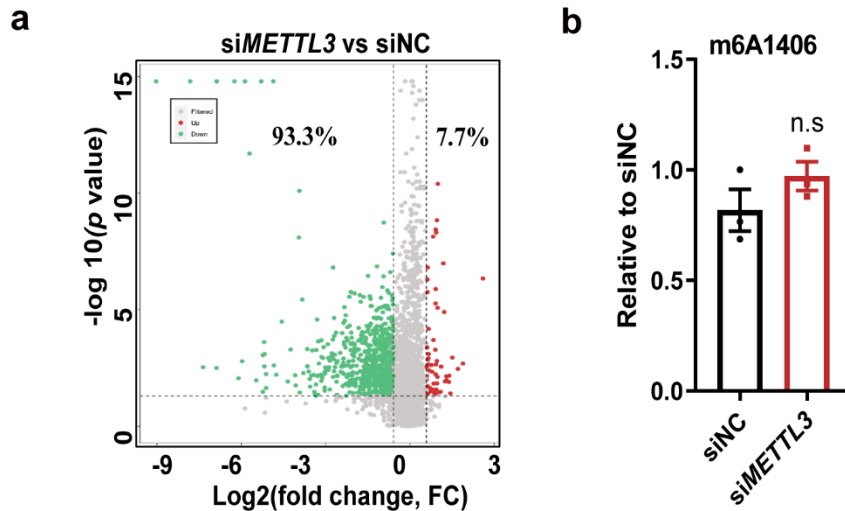

154

155 **Supplementary Figure 7 Identification m<sup>6</sup>A levels in METTL3-deficient**

156 **macrophages.** (a) m<sup>6</sup>A-seq showed significantly increased (red) or decreased (green)

157 m<sup>6</sup>A peaks ( $\geq 1.5$ -fold change,  $P < 0.05$ ) in human THP1-derived macrophages

158 transfected with *METTL3* siRNA pools, compared to control (NC) cells. (b) Relative

159 amount of SELECT qPCR products targeting the AGA<sup>1406</sup>CA site on *PTX3* 3'UTR

160 using the total RNA of THP1-derived macrophages transfected with *METTL3* or control

161 siRNA (n=3 cells). Statistical analysis of the data was performed using two-sided

162 unpaired t test (b). Data are presented as means  $\pm$  SEM from one of three independent

163 experiments. n.s = not significant.

164

165

166

167

168

169

170

171

172

173

174

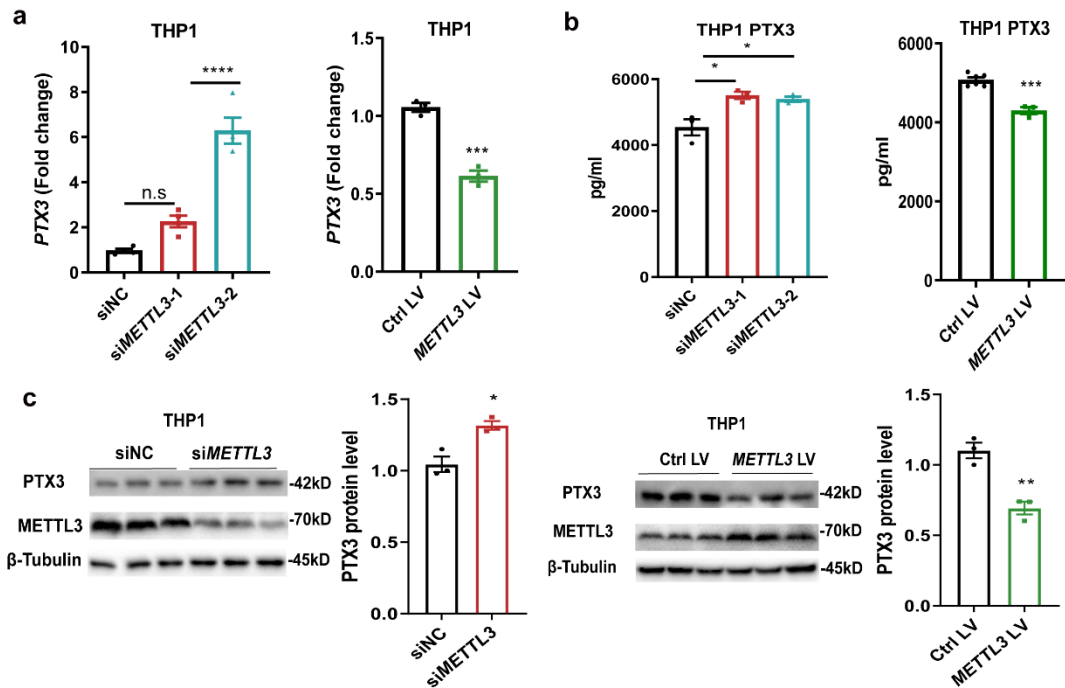

175

176 **Supplementary Figure 8 METTL3 suppresses *PTX3* expression in human THP1-**

177 **derived macrophages.** After knockdown of *METTL3* in human THP1-derived

178 macrophages using two distinct siRNAs (200 nM, left) or overexpression of *METTL3*

179 in THP1-derived macrophages with *METTL3* LV (right), followed by IL-4 stimulation.

180 mRNA and protein levels of *PTX3* were quantified by RT-qPCR (a) (n=4 cells for

181 knockdown group and n=3 cells for overexpression groups), ELISA (b) (n=6 cells for

182 Ctrl LV group and n=3 cells for other groups), and Western blot (c) (n=3 cells),

183 respectively. Statistical analysis of the data was performed using two-sided unpaired t

184 test (a right, b right, c), or 1-way ANOVA (a left, b left) followed by Tukey's multiple

185 comparison tests. Data are presented as means  $\pm$  SEM from one of three independent

186 experiments. \* $P < 0.05$ , \*\* $P < 0.01$ , \*\*\* $P < 0.001$ , \*\*\*\* $P < 0.0001$ ; n.s = not significant.

187

188

189

190

191

192

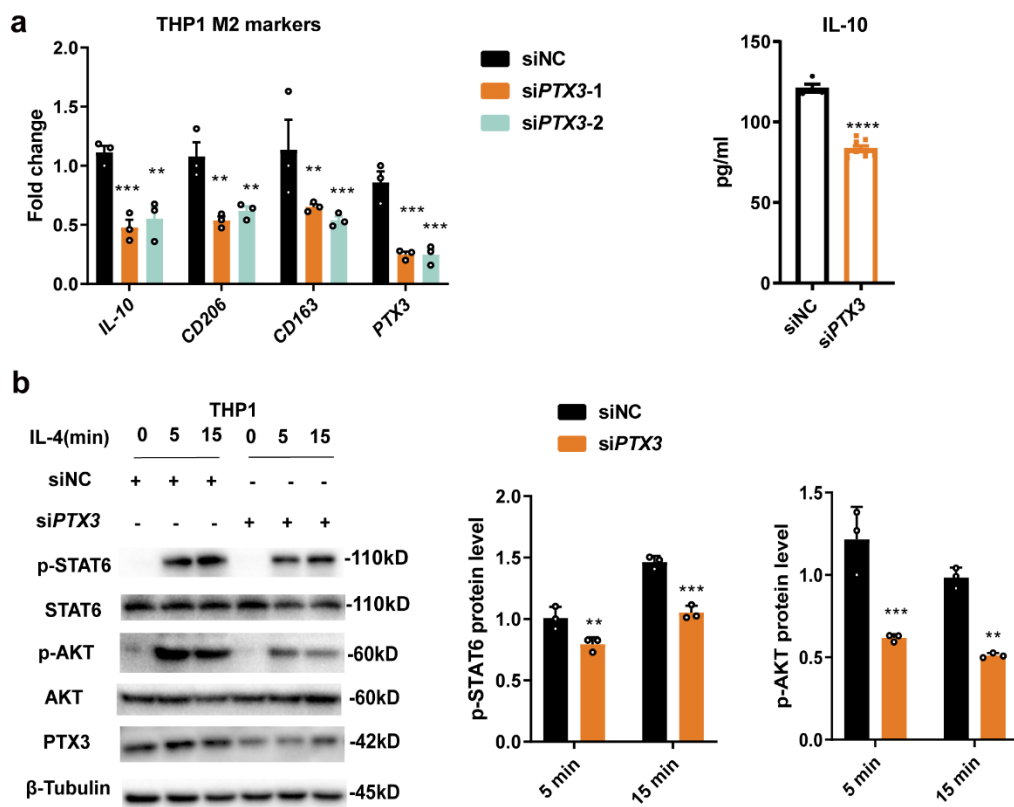

193

194 **Supplementary Figure 9 PTX3 promotes M2 macrophage activation through the**  
 195 **PI3K/AKT and JAK/STAT6 signaling pathways.** (a) Knockdown of *PTX3* in human  
 196 THP1-derived macrophages using two distinct siRNAs (200 nM), following IL-4  
 197 stimulation. M2-associated markers were quantified by RT-qPCR (left) (n=3 cells). NC,  
 198 negative control. ELISA showing the levels of IL-10 secretion (right) (n=4 cells for  
 199 control group and n=8 cells for knockdown groups). (b) Western blot analysis of AKT  
 200 and STAT6 phosphorylation in *PTX3*-knockdown THP1-derived macrophages (n=3  
 201 cells). Statistical analysis of the data was performed using two-sided unpaired t test (a  
 202 right), or 2-way ANOVA (a left, b) followed by either Tukey's or Sidak's multiple  
 203 comparison tests. Data are presented as means  $\pm$  SEM from one of three independent  
 204 experiments. \*\* $P < 0.01$ , \*\*\* $P < 0.001$ , \*\*\*\* $P < 0.0001$ .

205

206

207

208

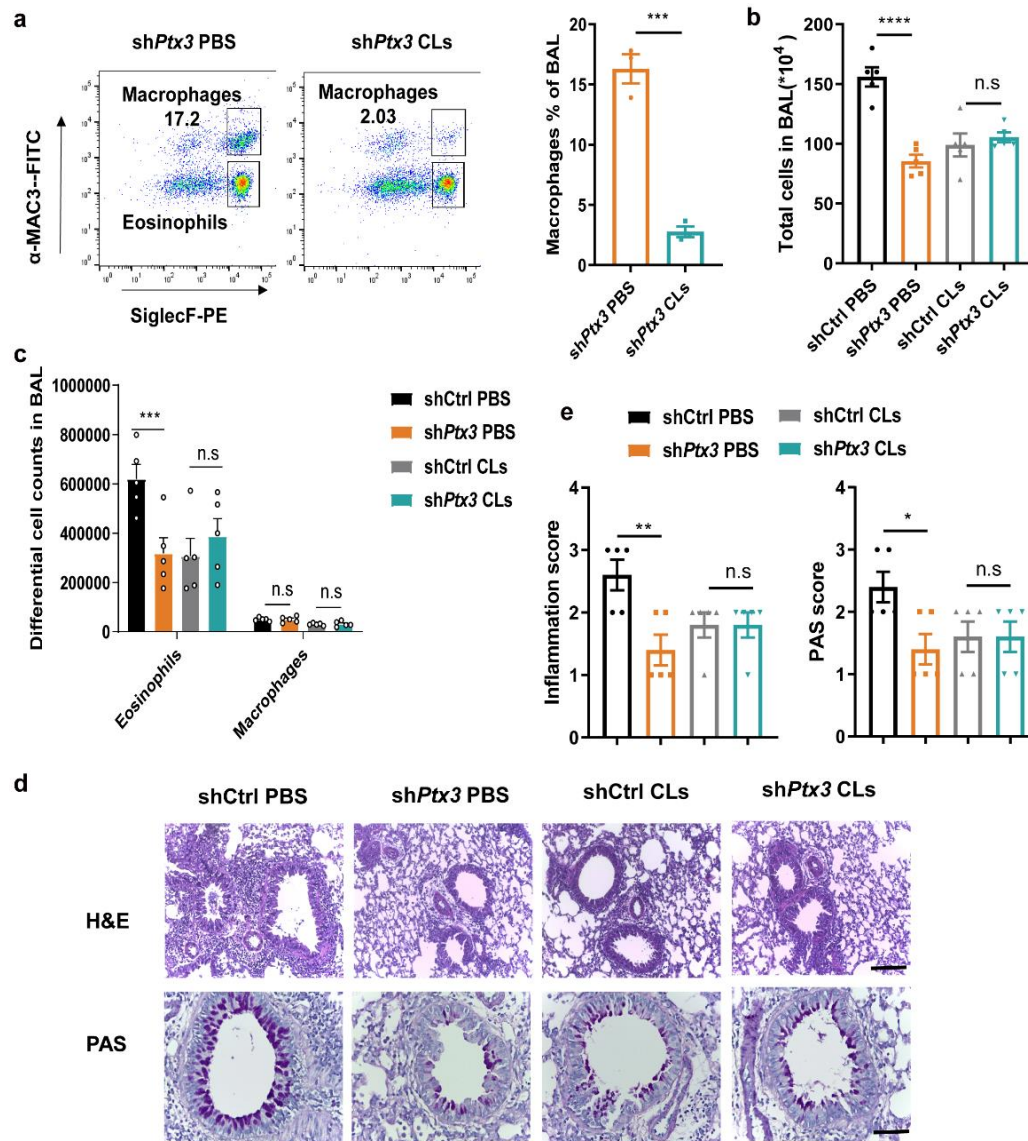

209

210 **Supplementary Figure 10 The effect of PTX3 on airway inflammation is**

211 **dependent on macrophages.** Every 72 h during CRE treatment, CLs-liposome (200

212 μl) was i.p. administered in the clodronate group. The shPtx3 lentivirus or shCtrl virus

213 was administered by intratracheal instillation on day 14. (a) Flow cytometry analysis of

214 the efficiency of macrophage depletion in BALF from shPtx3-treated mice by

215 clodronate treatment (n=3 animals). (b) Total and (c) differential BALF cell numbers

216 from experimental animals were analyzed by flow cytometry (n=5 animals). (d)

217 Histopathological changes in the lung tissues were examined by H&E- and PAS-

218 staining. Scale bars: 200 μm and 100 μm, respectively. (e) Calculated inflammation and

219 PAS scores (n=5 animals). Statistical analysis of the data was performed using two-

220 sided unpaired t test (a), 1-way ANOVA (b, e), and 2-way ANOVA (c) followed by  
221 Tukey's multiple comparison tests. Data are presented as means  $\pm$  SEM from one of  
222 three independent experiments. \* $P < 0.05$ , \*\* $P < 0.01$ , \*\*\* $P < 0.001$ , \*\*\*\* $P < 0.0001$ ;  
223 n.s = not significant.

224

225

226

227

228

229

230

231

232

233

234

235

236

237

238

239

240

241

242

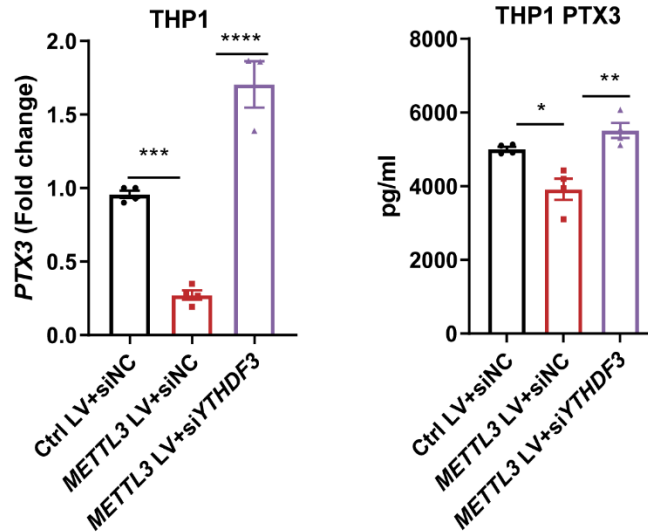

243

244 **Supplementary Figure 11 METTL3/YTHDF3 axis degrades the *PTX3* expression**

245 **in human THP1-derived macrophages.** *METTL3* or Ctrl LV-treated THP1-derived

246 macrophages were infected with *YTHDF3* siRNAs or control (NC), followed by IL-4

247 stimulation. RT-qPCR and ELISA assays detected the *PTX3* mRNA (n=3 for *METTL3*

248 LV+si*YTHDF3* group and n=4 cells for other groups) and protein levels (n=4 cells),

249 respectively. Statistical analysis of the data was performed using 1-way ANOVA

250 followed by Tukey's multiple comparison tests. Data are presented as means  $\pm$  SEM

251 from one of three independent experiments. \* $P < 0.05$ , \*\* $P < 0.01$ , \*\*\* $P < 0.001$ ,

252 \*\*\*\* $P < 0.0001$ .

253

254

255

256

257

258

259

260

261

262

263

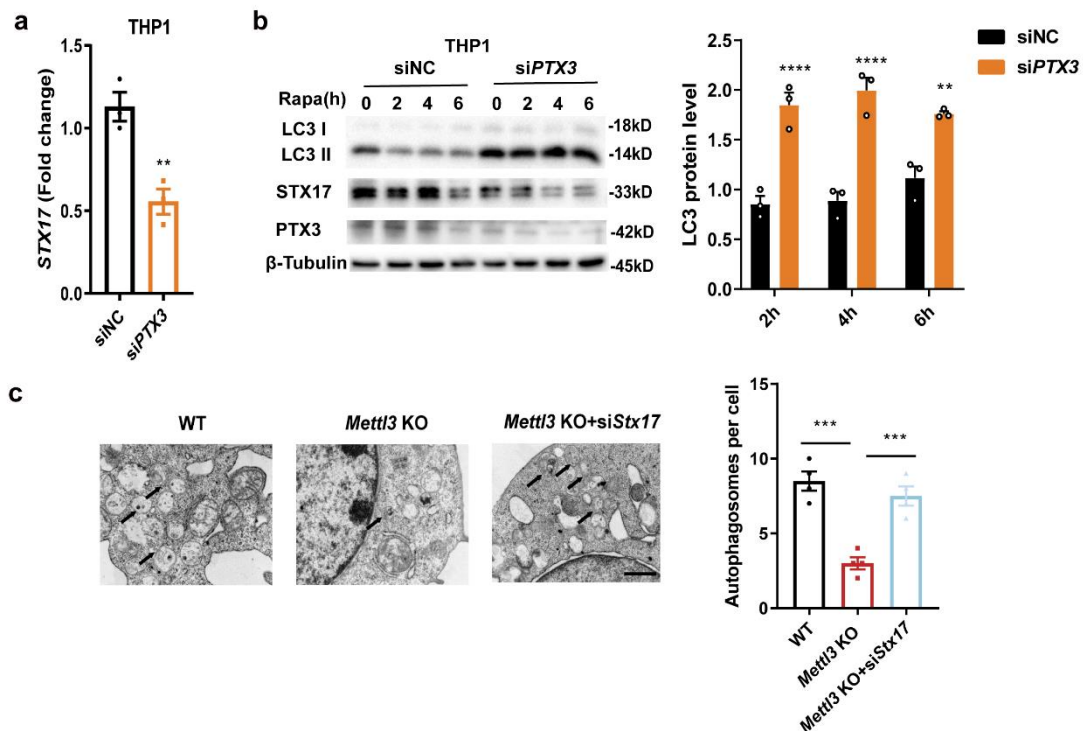

264

265 **Supplementary Figure 12 METTL3/PTX3/STX17 axis in macrophage controls**

266 **autophagy maturation.** (a) RT-qPCR showing reduced levels of *STX17* in *PTX3*-

267 knockdown THP1-derived macrophages compared to control cells (n=3 cells).

268 Immunoblot analysis of LC3, STX17, and PTX3 levels in control and *PTX3*-

269 knockdown THP1-derived macrophages treated with rapamycin for 0–6 h (n=3 cells).

270 (c) Analysis of the autophagosome number in *Mettl3* KO BMDMs with or without

271 *siStx17* knockdown (n=4 cells). Scale bars, 1 $\mu$ m. Statistical analysis of the data was

272 performed using two-sided unpaired t test (a), 1-way ANOVA (c), and 2-way ANOVA

273 (b) followed by either Tukey's or Sidak's multiple comparison tests. Data are presented

274 as means  $\pm$  SEM from one of three independent experiments. \*\* $P < 0.01$ , \*\*\* $P < 0.001$ ,

275 \*\*\*\* $P < 0.0001$ .

276

277

278

279

280



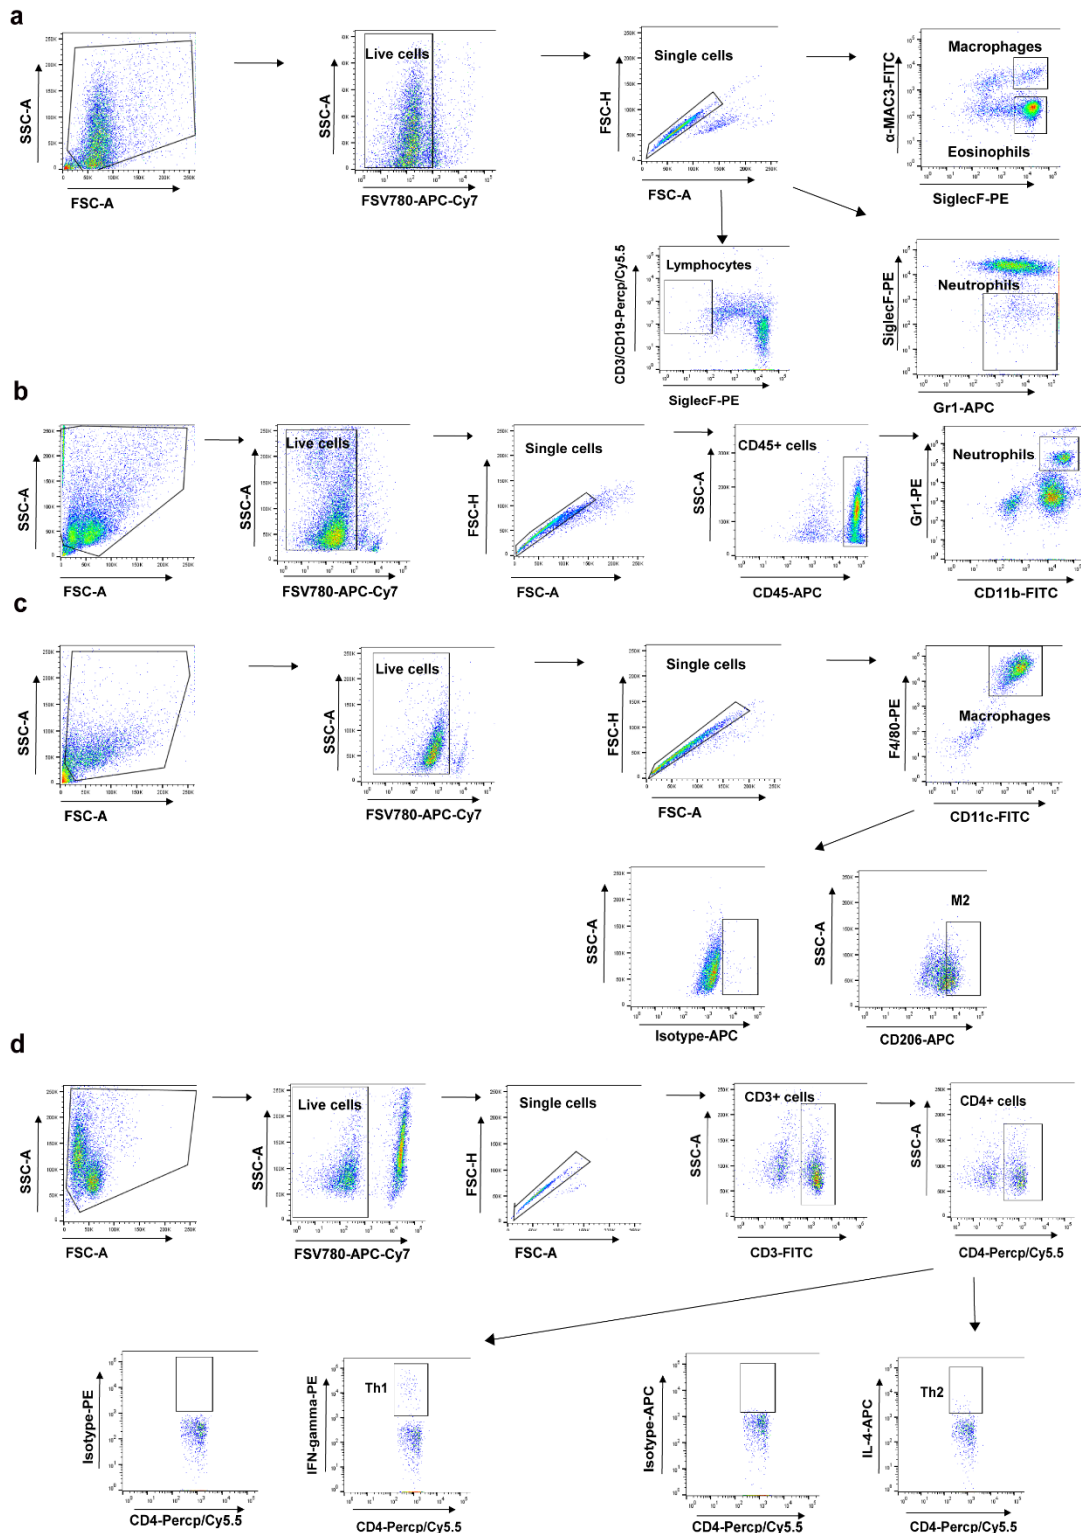

281

282 **Supplementary Figure 13 Gating strategies used for flow cytometry.** (a) Gating

283 strategy to analyze BALF cells, such as eosinophils and macrophages, in experimental

284 models. (b) Gating strategy to analyze the efficiency of neutrophils depletion in BALF

285 on Supplementary Figure 2. (c) Gating strategy to analyze the M2 macrophage  
286 subpopulation in BALF. (d) Gating strategy to analyze the Th2 cells and Th1 cells in  
287 MLNs from mice.

288

289

290

291

292

293

294

295

296

297

298

299

300

301

302

303

304

305

306

307 **Supplementary Table 1. The M2 macrophage activation-associated genes.**

| <b>M2 macrophage activation-associated genes with known regulatory functions</b> |       |        |       |
|----------------------------------------------------------------------------------|-------|--------|-------|
| STAT6                                                                            | SOCS1 | STAT3  | NFIL3 |
| DUSP6                                                                            | IRF4  | PPARG  | SOCS2 |
| SOCS3                                                                            | SBNO2 | GATA3  | SMAD2 |
| ID3                                                                              | RGS1  | CCL4   | CCL13 |
| CCL17                                                                            | CCL18 | CD206  | CD163 |
| MMP1                                                                             | MMP12 | IL17RB | TGM2  |
| ALOX15                                                                           | PTX3  | RIPK3  | KLF4  |

308

309

310

311

312

313

314

315

316

317

318

319

320

321

322

323

324

325

326

327 **Supplementary Table 2. Demographic and respiratory health characteristics of**  
 328 **children with allergic asthma and healthy controls.**

| <b>Characteristic</b>                   | <b>Normal (N=50)</b> | <b>Asthma(N=55)</b> |
|-----------------------------------------|----------------------|---------------------|
| <b>Male/Female, no.</b>                 | 30/20                | 34/21               |
| <b>Age, years</b>                       | 7.20± 2.67           | 8.07±2.64           |
| <b>Asthma duration, years</b>           | N/A                  | 1.40± 1.09          |
| <b>BMI</b>                              | 17.68± 3.44          | 17.52± 2.92         |
| <b>Blood eos<sup>1</sup> (cells/uL)</b> | N/A                  | 323.64± 212.28      |
| <b>Total IgE (ku/L)</b>                 | Not done             | 607.85± 33.41       |
| <b>C-ACT score <sup>2</sup></b>         | Not done             | 22.29± 3.94         |
| <b>FeNO, ppb</b>                        | Not done             | 23.76± 18.00        |
| <b>%FEV<sub>1</sub></b>                 | Not done             | 97.23± 18.89        |

329 Values are presented as mean ±SEM. <sup>1</sup> eos, eosinophil. <sup>2</sup> C-ACT, Childhood Asthma  
 330 Control Test.

331 The diagnosis of childhood asthma is established based on combinations of episodic  
 332 respiratory symptoms (wheezing, cough and dyspnea), reversible airflow limitation,  
 333 presence of personal or family history of allergic diseases according to the 2016 edition  
 334 of the Guidelines for the Diagnosis and Prevention of Childhood Bronchial Asthma of  
 335 China. A lung function test was performed, and percent predicted forced expiratory  
 336 volume in 1 second (%FEV<sub>1</sub>), fraction of exhaled nitric oxide (FeNO) levels, blood  
 337 eosinophil numbers and Childhood Asthma Control Test (C-ACT) scores were recorded.  
 338 The control group included children of the same age range, who did not suffer from  
 339 asthma and other allergic diseases. Children with other chronic respiratory conditions,  
 340 obesity, diabetes, heart disease, immunodeficiency, or any other chronic disease that  
 341 might impact the main outcomes of this study were excluded. The sex/gender of human  
 342 participants was determined based on self-reporting. Consent has been obtained for  
 343 sharing of individual-level data. Patients were not compensated for their participation  
 344 beyond receipt of therapy and associated care.

345

346 **Supplementary Table 3. The primer sequences.**

347 **Identification of *Mettl3*<sup>fllox/fllox</sup> mice**

| <b>genes</b> | <b>Forward primer(5'-3')</b> | <b>Reverse primer(5'-3')</b> |
|--------------|------------------------------|------------------------------|
| <b>P1</b>    | GTTTGCACAAGGAGTATT<br>T      | TCATCTGGGGAAGGAG<br>GAGTG    |

348

349 **Identification of *Lyz2*-Cre mice**

| <b>genes</b>    | <b>Forward primer(5'-3')</b> | <b>Reverse primer(5'-3')</b> |
|-----------------|------------------------------|------------------------------|
| <b>Mutant</b>   | CCCAGAAATGCCAGATT<br>ACG     | CTTGGGCTGCCAGAAT<br>TTCTC    |
| <b>Wildtype</b> | CCCAGAAATGCCAGATT<br>ACG     | TTACAGTCGGCCAGGC<br>TGAC     |

350

351 **Mouse RT-qPCR analysis**

| <b>genes</b>        | <b>Forward primer (5'-3')</b> | <b>Reverse primer (5'-3')</b> |
|---------------------|-------------------------------|-------------------------------|
| <i>Actin (beta)</i> | CATTGCTGACAGGATGC<br>AGAAGG   | TGCTGGAAGGTGGACA<br>GTGAGG    |
| <i>Il-10</i>        | CGGGAAGACAATAACTG<br>CACCC    | CGGTTAGCAGTATGTT<br>GTCCAGC   |
| <i>Arg1</i>         | CATTGGCTTGCGAGACGT<br>AGAC    | GCTGAAGGTCTCTTCC<br>ATCACC    |
| <i>Cd206</i>        | GTTACCTGGAGTGATGG<br>TTCTC    | AGGACATGCCAGGGTC<br>ACCTTT    |
| <i>Tnf</i>          | AAACACAAGATGCTGGG<br>ACA      | TTGATGGTGGTGCATG<br>AGAG      |
| <i>Il-6</i>         | TACCACTTCACAAGTCGG<br>AGGC    | CTGCAAGTGCATCATC<br>GTTGTTC   |
| <i>Il-1β</i>        | GCACTACAGGCTCCGAG<br>ATG      | CGTTGCTTGGTTCTCCT<br>TGTAC    |

|               |                              |                              |
|---------------|------------------------------|------------------------------|
| <i>Ptx3</i>   | CGAAATAGACAATGGAC<br>TTCATCC | CATCTGCGAGTTCTCC<br>AGCATG   |
| <i>Mettl3</i> | CAGTGCTACAGGATGAC<br>GGCTT   | CCGTCCTAATGATGCG<br>CTGCAG   |
| <i>Stx17</i>  | GCTGCTTCTCAGAGTCTG<br>ACTC   | TGTCAGTGACCAGATG<br>GCTCAG   |
| <i>Ccl17</i>  | CGAGAGTGCTGCCTGGA<br>TFACT   | GGTCTGCACAGATGAG<br>CTTGCC   |
| <i>Ccl22</i>  | GTGGAAGACAGTATCTG<br>CTGCC   | AGGCTTGCGGCAGGAT<br>TTTGAG   |
| <i>Ifng</i>   | CAGCAACAGCAAGGCGA<br>AAAAGG  | TTTCCGCTTCCTGAGG<br>CTGGAT   |
| <i>Il-17a</i> | CAGACTACCTCAACCGTT<br>CCAC   | TCCAGCTTTCCCTCCG<br>CATTGA   |
| <i>Il-4</i>   | ATCATCGGCATTTTGAAC<br>GAGGTC | ATCATCGGCATTTTGA<br>ACGAGGTC |
| <i>Il-13</i>  | AACGGCAGCATGGTATG<br>GAGTG   | TGGGTCCTGTAGATGG<br>CATTGC   |

352

353 **Human RT-qPCR analysis**

| <b>genes</b>  | <b>Forward primer (5'-3')</b> | <b>Reverse primer (5'-3')</b> |
|---------------|-------------------------------|-------------------------------|
| <i>ACTIN</i>  | CACCATTGGCAATGAGC<br>GGTTC    | AGGTCTTTGCGGATGT<br>CCACGT    |
| <i>METTL3</i> | CTATCTCCTGGCACTCGC<br>AAGA    | GCTTGAACCGTGCAAC<br>CACATC    |
| <i>IL-10</i>  | TCTCCGAGATGCCTTCAG<br>CAGA    | TCAGACAAGGCTTGGC<br>AACCCA    |
| <i>CD163</i>  | CCAGAAGGAACTTGTAG<br>CCACAG   | CAGGCACCAAGCGTTT<br>TGAGCT    |

|                               |                              |                               |
|-------------------------------|------------------------------|-------------------------------|
| <i>CD206</i>                  | AGCCAACACCAGCTCCTC<br>AAGA   | CAAAACGCTCGCGCAT<br>TGTCCA    |
| <i>YTHDF3</i>                 | GCTACTTTCAAGCATAACC<br>ACCTC | ACAGGACATCTTCATA<br>CGGTTATTG |
| <i>PTX3</i>                   | CGAAATAGACAATGGAC<br>TCCATCC | CTCATCTGCGAGTTCT<br>CCAGCA    |
| <i>METTL14</i>                | CTGAAAGTGCCGACAGC<br>ATTGG   | CTCTCCTTCATCCAGA<br>TACTTACG  |
| <i>FTO</i>                    | CCAGAACCTGAGGAGAG<br>AATGG   | CGATGTCTGTGAGGTC<br>AAACGG    |
| <i>ALKBH5</i>                 | CCAGCTATGCTTCAGATC<br>GCCT   | GGTTCTCTTCCTTGTC<br>ATCTCC    |
| <i>TNF</i>                    | CTCTTCTGCCTGCTGCAC<br>TTTG   | ATGGGCTACAGGCTTG<br>TCACTC    |
| <i>IL-6</i>                   | AGACAGCCACTCACCTCT<br>TCAG   | TTCTGCCAGTGCCTCT<br>TTGCTG    |
| <i>IL-1<math>\beta</math></i> | CCACAGACCTTCCAGGA<br>GAATG   | GTGCAGTTCAGTGATC<br>GTACAGG   |
| <i>STX17</i>                  | TCGTGGGAAACCTTAGA<br>AGCGG   | GCAGCACTGTTGACAT<br>GGTCTG    |

354

355 **SELECT qPCR analysis**

| <b>genes</b>                | <b>Up primer (5'-3')</b>     | <b>Down primer (5'-3')</b>            |
|-----------------------------|------------------------------|---------------------------------------|
| <i>PTX3</i>                 | tagccagtaccgtagtgcgtgGAGT    | 5phos/TTCACAACATTTATGAA               |
| <i>AGA<sup>1333</sup>CT</i> | TTCTTTCTTTGGCTTCAA<br>GTGGAG | ACATACTGAGCTCcagaggctgagt<br>cgctgcat |

356

357 **Gene-specific m<sup>6</sup>A qPCR analysis**

| <b>genes</b> | <b>Forward primer (5'-3')</b> | <b>Reverse primer (5'-3')</b> |
|--------------|-------------------------------|-------------------------------|
|--------------|-------------------------------|-------------------------------|

|                    |                   |                  |
|--------------------|-------------------|------------------|
| <b><i>PTX3</i></b> | CAGCCACATGGAGGAGC | TCAACTGTTTATTCAG |
|                    | TCAGTATGTTTCA     | TATTTGGCCAGTAC   |

358

359 **Human *PTX3* 3'UTR dual-luciferase reporter analysis**

| <b>genes</b>                    | <b>Forward primer(5'-3')</b> | <b>Reverse primer(5'-3')</b> |
|---------------------------------|------------------------------|------------------------------|
| <b><i>PTX3</i> WT 3'UTR</b>     | CATCGAGAAACTCCACTT           | GGCTACTTCAACTGTT             |
|                                 | GAAGCCAAAGAAAGAAA            | TATTCAGTATTTGGCC             |
|                                 | C                            | AGTA                         |
| <b><i>PTX3</i> Mutant 3'UTR</b> | TAATAGGAACACTTGAG            | ACTCTCTCTTTCATTAG            |
|                                 | TCTAATGAAAGAGAGAG            | ACTCAAGTGTTCCCTAT            |
|                                 | T                            | TA                           |

360

361 **Human *METTL3* lentivirus construct**

| <b>genes</b>           | <b>Forward primer (5'-3')</b> | <b>Reverse primer (5'-3')</b> |
|------------------------|-------------------------------|-------------------------------|
| <b><i>METTL3-1</i></b> | AGGGTTCCAAGCTTAAG             |                               |
|                        | CGGCCGCGCCACCATGTC            |                               |
|                        | GGACACGTGGAGCTCTA             |                               |
|                        | TCCAG                         |                               |
| <b><i>METTL3-2</i></b> | ATCAGTAGAGAGTGTCG             |                               |
|                        | GATCCCTATAAATTCTTA            |                               |
|                        | GGTTTAGAGATGATGCC             |                               |
|                        | GTCC                          |                               |

362

363

364

365

366

367

368



**Supplementary Table 4. The sequences of siRNA and shRNA lentivirus.**

| <b>GENES</b>           | <b>Sense (5'-3')</b>      | <b>Antisense (5'-3')</b>  |
|------------------------|---------------------------|---------------------------|
| <b>Human NC</b>        | UUCUCCGAACGUGUCACG<br>UTT | ACGUGACACGUUCGGAGAA<br>TT |
| <b>siRNA</b>           |                           |                           |
| <b>Human</b>           | GCAGAACAGGACUCGACU<br>ATT | UAGUCGAGUCCUGUUCUGC<br>TT |
| <b><i>METTL3</i></b>   |                           |                           |
| <b>siRNA1</b>          |                           |                           |
| <b>Human</b>           | GCUCAACAUACCCGUACU<br>ATT | UAGUACGGGUAUGUUGAGC<br>TT |
| <b><i>METTL3</i></b>   |                           |                           |
| <b>siRNA2</b>          |                           |                           |
| <b>Human</b>           | GCACAAAGAGGAAUCCAU<br>ATT | UAUGGAUUCCUCUUUGUGC<br>TT |
| <b><i>PTX3</i></b>     |                           |                           |
| <b>siRNA1</b>          |                           |                           |
| <b>Human</b>           | GGGAUAGUGUUCUUAGCA<br>ATT | UUGCUAAGAACACUAUCCC<br>TT |
| <b><i>PTX3</i></b>     |                           |                           |
| <b>siRNA2</b>          |                           |                           |
| <b>Human</b>           | AGCAGAGGAAACAGGCGA<br>ATT | UUCGCCUGUUUCCUCUGCU<br>TT |
| <b><i>YTHDF3</i></b>   |                           |                           |
| <b>siRNA1</b>          |                           |                           |
| <b>Human</b>           | GCUGGAUUUGGCAAUGAU<br>ATT | UAUCAUUGCCAAAUCCAGC<br>TT |
| <b><i>YTHDF3</i></b>   |                           |                           |
| <b>siRNA2</b>          |                           |                           |
| <b>Mouse</b>           | TTCTCCGAACGTGTCACGT       |                           |
| <b>shCtrl</b>          |                           |                           |
| <b>Mouse</b>           | GAGCTCATGTATGTGAATT       |                           |
| <b>sh<i>Ptx3</i>-1</b> | TG                        |                           |
| <b>Mouse</b>           | GGGACAAGCTGTTTCATCAT      |                           |
| <b>sh<i>Ptx3</i>-2</b> | GC                        |                           |
| <b>Mouse</b>           | GAGCCAGCGAUACAGAAA        |                           |

---

|                  |                    |
|------------------|--------------------|
| <b>shStx17-1</b> | UTT                |
| <b>Mouse</b>     | GCUCCAAUAUCCGAGAAA |
| <b>shStx17-2</b> | UTT                |

---

370
