# Supplementary material for: RNA m6A methylation modulates airway inflammation in allergic asthma via PTX3-dependent macrophage homeostasis
Source: PubMed Central journal article supplement (PMC10643624; doi:10.1038/s41467-023-43219-w), 2023-11-13
Supplement: 41467_2023_43219_MOESM2_ESM.pdf [file 41467_2023_43219_MOESM2_ESM.pdf]

### RNA m6A Methylation Modulates Airway Inflammation in Allergic Asthma via PTX3-dependent Macrophage Homeostasis

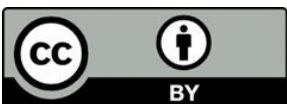

**Open Access** This file is licensed under a Creative Commons Attribution 4.0 International License, which permits use, sharing, adaptation, distribution and reproduction in any medium or format, as long as you give appropriate credit to the original author(s) and the source, provide a link to the Creative Commons license, and indicate if changes were made. In the cases where the authors are anonymous, such as is the case for the reports of anonymous peer reviewers, author attribution should be to 'Anonymous Referee' followed by a clear attribution to the source work. The images or other third party material in this file are included in the article's Creative Commons license, unless indicated otherwise in a credit line to the material. If material is not included in the article's Creative Commons license and your intended use is not permitted by statutory regulation or exceeds the permitted use, you will need to obtain permission directly from the copyright holder. To view a copy of this license, visit <http://creativecommons.org/licenses/by/4.0/>.

## REVIEWER COMMENTS

### Reviewer #1 Mettl3 (Remarks to the Author):

The manuscript by Han et al presents some lines of evidence for a role of m6A in Allergic Asthma via modulation of macrophage homeostasis. Cre-lox induced knock out of METTL3 in myeloid cells leads to increased inflammatory response in the lungs of a murine allergic asthma model. Consistently METTL3 expression in macrophages negatively correlates with the severity of the disease in children. Lack of METTL3 leads to M2 macrophage activation both in mouse and human cells. RNA seq and meRIP-seq analyses pointed towards PTX3 as a good candidate for m6A target in this process. Indeed KD of PTX3 rescued the inflammatory defects induced by the METTL3 depletion. This function of m6A seems to be mediated through the m6A reader YTHDF3. Finally the authors demonstrated that Ptx3 regulates the expression of STX17 thereby impacting autophagy in macrophages.

This is an impressive amount of work demonstrating the role of m6A in Asthma. Previous reports already found that METTL3 foster M1 activation in macrophages. What is novel here is the identification of the Ptx3 m6A target that inhibits M2 activation. Overall the data are relatively convincing, even though further validation is needed.

### Major comments

The m6A-seq data look very noisy and I am not convinced that the experiment indeed worked. First the reported enriched site is different from the consensus one. The authors indicate that GGAC was significantly enriched but it's actually GGAT that is more enriched, which is not normally methylated in other cell types. Second, the authors do not provide the metagene profile where typically m6A is enriched near stop codons. Third the tracks shown in Fig 3G are quite noisy and the enrichment is difficult to detect.

In Fig 3K it's not clear whether the sites that were mutated are indeed methylated. This needs to be validated by an alternative approach (e.g. SCARLET, SELECT).

The result of the YTHDF3 pulldown in Fig 5G is not consistent with the expectation. The depletion of METTL3 should lead to decrease binding of the reader to their targets. How do the authors explain this inconsistency?

The data concerning the PTX3/STX17 axis lacks connection with the m6A pathway. The authors should demonstrate that m6A indeed regulates STX17 expression, as well as autophagy. An interesting experiment would be to test whether the KD of STX17 rescues the decrease of autophagosomes in BMDMs derived from METTL3 KO mice.

Other comments

The quality of the figures is pretty poor. There is a lack of consistency between the fonts of the different panels.

How often the different western blots were performed? Some of them lack quantification.

Some of the conclusions are too affirmative (i.e. lane 266, lanes 293-295).

**Reviewer #2 asthma (Remarks to the Author):**

NCOMMS-22-37321

In this manuscript, the authors convincingly show that METTL3 expression negatively regulates the development of alternatively activated (M2) macrophages. They perform experiments in mice that genetic deletion of METTL3 using the *Lyz2-Cre* increases allergic airway inflammation after cockroach sensitization and challenge compared to WT mice. They also use the human macrophage cell line THP to show that suppression of METTL3 increases M2 polarization, while THP cells that ectopically express METTL3 preferentially polarized to the M1 phenotype. They further show that phosphorylation of AKT and STAT6 were upregulated in BMDM from METTL3-deficient mice following IL-4 stimulation compared to BMDM from WT mice. A similar result was found with METTL3 knockdown in

THP cells. Further studies suggested that PTX3 was a target for METTL3 and the authors showed that disruption of PTX3 inhibited M2 polarization with genetic depletion of METTL3. Additionally, inhibition of PTX3 reduced the increased airway mucus expression, eosinophilia, and airway responsiveness in the cockroach sensitized and challenged METTL3 KO, seemingly closing the loop on the mechanism. Lastly, loss of METTL3 impaired the YTHDF3-mediated degradation of PTX3 mRNA, showing that YTHDF3 inhibition of PTX3 was critical for METTL3 inhibition of the M2 phenotype.

#### Major points

There are three major concerns regarding this manuscript, and these are listed individually in the following paragraphs:

First, a major unanswered question is how does the deletion of METTL3 in macrophages change allergen-induced mucus in the airway, airway eosinophils, and airways responsiveness to methacholine? The authors show that STAT6 is upregulated in the macrophages, but how does this regulate an overall increase in Th2 inflammation? In figure 1, the authors do not measure Th2 cytokines in the lungs or BAL fluid. Does the change in macrophage expression of METTL3 have an effect on the recruitment or activation of CD4+ T lymphocytes or the chemokines that recruit Th2 cells to the lung? This could be evaluated by intracellular flow cytometry examining the CD4+ compartment for the production of these cytokines. Also, the BAL and lung homogenates could be assessed for chemokines associated with CD4+ Th2 cell recruitment. How inhibition of METTL3 regulates the cardinal features of asthma in the allergen-challenge model needs to be clearly and comprehensively defined.

Second, in line 136, the title of this section, the authors state "Low METTL3 expression in macrophages from children with allergic asthma is associated with severe disease." This is an extremely misleading statement because it gives the impression that the authors were studying tissue derived macrophages, when they were instead collecting PBMC and then in vitro stimulating the cells to develop a macrophage phenotype. This is very different from what they imply that they are doing in the title. Ideally, the authors would be examining



alveolar macrophages from children because the blood PMBC compartment may not reflect what is transpiring in the lung macrophage. While it is difficult to obtain alveolar macrophages from children with asthma due to the safety concerns associated with bronchoscopy from this population, it does not excuse the authors for being inaccurate in their portrayal of the cells they used in their assays and also to acknowledge the limitation of this approach in the discussion.

The third issue is that the authors did not perform the correct statistical tests. For instance, in line 781 a two-way ANOVA should have been used rather than a one-way ANOVA since there were two factors being assessed - the response to cockroach allergen challenge and the genetics of the mice. More critically, in line 782, the authors state that they used a Pearson correlation, and this is not the correct test as the data certainly does not appear to be normally distributed. Therefore, the authors used have used the nonparametric Spearman correlation, which likely will negate the statistical significance that they report. All the correlation analyses should be performed using the appropriate statistical test and it appears that these correlations may not be significant as they are being driven by a very few values at the extremes of the data set in several of the analyses.

#### Minor points

Figure 5E- It is not clear why the total STAT6 is changing in this blot. Total cellular STAT6 does not change with increases in p-STAT6.

#### **Reviewer #3 airway macrophages, airway disease (Remarks to the Author):**

In the current studies, Xiao Han et. al., observed a decrease in the expression of m6A methyltransferase, METTL3, in peripheral blood macrophages that was associated with the severity of childhood allergic asthma. They further showed that knockout of Mettl3 in myeloid cells skewed macrophages towards an M2-like phenotype and resulted in exacerbated allergen-driven airway inflammation in vivo. Mechanistic studies demonstrated that loss of METTL3 impaired the m6A-YTHDF3 dependent degradation of PTX3 mRNA, which was associated with enhanced allergic airway inflammation and childhood asthma severity. Finally, a role for PTX3 regulating autophagy maturation in macrophages by

reducing STX17 expression is shown. The findings presented in the study are novel and may have important therapeutic implications pertinent to targeting m6A methyltransferase METTL3 signaling in the context of allergic asthma. However, there are several issues that need to be addressed to strengthen the findings proposed.

Major issues:

1. Crossing *Mettl3<sup>fl/fl</sup>* mice with *Lyz2-Cre* mice to ablate *Mettl3* in the myeloid compartment does not solely target macrophages/monocytes, but also granulocytes and more specifically neutrophils. The authors need to investigate *Mettl3* expression in airway neutrophils and explore their phenotype in *Mettl3<sup>-/-</sup>* mice, as depletion of *Mettl3* in neutrophils may also contribute to the observed exacerbated allergic airway disease.
2. The authors should explore Th1, Th17 and Th2 cell-associated cytokine release in the BAL and/or lung homogenates to inform on the effects of *Mettl3* deficiency on the type of the allergic response.
3. What was the phenotype (M1 vs M2) of airway-infiltrating macrophages in the *mettl3<sup>-/-</sup>* mice?
4. What were the protein levels of *Mettl3* in the peripheral blood macrophages in children with asthma compared to controls?
5. How did the authors define asthma severity? Increased eosinophilic inflammation is not the only marker of disease severity. What about exacerbation frequencies? Which types of medications were these patients on when these measurements were made?
6. Why did the authors use THP-1 monocytes and not peripheral blood macrophages or BMDMs for the *Mettl3* knockdown or overexpression experiments? The authors observations need to be validated in a more physiologically relevant system.
7. What do the authors mean by 'gain of function' experiments? Do they mean overexpression? What are the baseline *Mettl3* levels in these cells?
8. The authors propose that *Mettl3* deficiency skewed macrophages towards an M2-like phenotype through decreasing NF- $\kappa$ B levels and increasing and activating PI3K/AKT and JAK/STAT6 signaling. This statement is not correct. In order to show this, the authors need to inhibit PI3K/AKT and JAK/STAT6 and/or activate NF $\kappa$ B and see a reversal of the phenotype.
9. In line 222 (and in other parts of the manuscript) the authors state that *Metll3* deficiency aggravated allergic airway disease phenotype through skewing macrophages towards M2-

like cells. However, they only show association data. To definitely prove this they need to either transfer Metl3<sup>-/-</sup> airway-infiltrating macrophages in naive mice and see exacerbation of airway inflammation or they need to deplete M2 macrophages in Metl3<sup>-/-</sup> and see disease amelioration.

10. In line 293, the authors state that 'the upregulation of PTX3 was responsible for the preferential M2 macrophage activation seen in METTL3 deficient macrophages'. To validate this statement, the authors should knockdown PTX3 in Mettl3<sup>-/-</sup> cells and see reversal of the M2 characteristics.

11. Administration of a lentivirus is expected to infect all cells in the lung and not specifically alveolar macrophages. The authors should show that knockdown of PTX3 specifically in macrophages ameliorates disease phenotype in Mettl3<sup>-/-</sup> mice.

12. In figures 1 and 4, better quality histology microphotographs of H&E and PAS staining should be provided.

13. In the immunostaining experiments in Figures 2 and 4, CD206+F4/80+ expressing macrophages are not clearly shown. Higher magnifications should be provided. In Figure 4, PTX3 expressing M2 macrophages are also not clearly shown and higher magnifications should be provided.

Minor issues:

1. It is not clear from the introduction why the authors chose to explore childhood asthma.
2. A concise hypothesis is missing.
3. Certain references are missing (i.e. line 87)
4. The manuscript would benefit from revision by an English native speaker.

## 1 Point-by-point responses

2 To Reviewer: 1

3  
4 *The manuscript by Han et al presents some lines of evidence for a role of m6A in*  
5 *Allergic Asthma via modulation of macrophage homeostasis. Cre-lox induced knock*  
6 *out of METTL3 in myeloid cells leads to increased inflammatory response in the lungs*  
7 *of a murine allergic asthma model. Consistently METTL3 expression in macrophages*  
8 *negatively correlates with the severity of the disease in children. Lack of METTL3 leads*  
9 *to M2 macrophage activation both in mouse and human cells. RNA seq and meRIP-seq*  
10 *analyses pointed towards PTX3 as a good candidate for m6A target in this process.*  
11 *Indeed KD of PTX3 rescued the inflammatory defects induced by the METTL3 depletion.*  
12 *This function of m6A seems to be mediated through the m6A reader YTHDF3. Finally*  
13 *the authors demonstrated that Ptx3 regulates the expression of STX17 thereby*  
14 *impacting autophagy in macrophages.*  
15 *This is an impressive amount of work demonstrating the role of m6A in Asthma.*  
16 *Previous reports already found that METTL3 foster M1 activation in macrophages.*  
17 *What is novel here is the identification of the Ptx3 m6A target that inhibits M2*  
18 *activation. Overall the data are relatively convincing, even though further validation is*  
19 *needed.*

20 Response:

21 We thank the reviewer for carefully reading our manuscript and appreciate the helpful  
22 comments and critical questions. We have studied these issues carefully and provided  
23 our responses point to point as listed below. And based on these suggestions and  
24 questions, we have made changes to the original manuscript to improve our manuscript.  
25 We hope that the revised manuscript would be better for the readers to understand our  
26 points and finally meet with your approval to get published.

27 .  
28 *1) The m6A-seq data look very noisy and I am not convinced that the experiment indeed*  
29 *worked. First the reported enriched site is different from the consensus one. The authors*

30 *indicate that GGAC was significantly enriched but it's actually GGAT that is more*  
31 *enriched, which is not normally methylated in other cell types. Second, the authors do*  
32 *not provide the metagene profile where typically m6A is enriched near stop codons.*  
33 *Third the tracks shown in Fig 3G are quite noisy and the enrichment is difficult to detect.*

34 Response:

35 We are sorry for the unclear description of the m<sup>6</sup>A-seq data analysis, and greatly  
36 appreciate the reviewer's comments. The previously enriched m<sup>6</sup>A motif "GGAC" in  
37 both control and *METTL3*-deficient cells was identified using DREME software,  
38 whereas the significance of motifs analyzed by this software was not very high. Recent  
39 transcriptome-wide m<sup>6</sup>A mapping approaches suggest the consensus m<sup>6</sup>A motif is  
40 "RRACH" (R= G or A; H = A, C or U) <sup>1,2</sup>. To carefully identify the sequence features  
41 of m<sup>6</sup>A, we re-performed motif search of m<sup>6</sup>A-enriched regions by MEME software,  
42 and the previously reported consensus "RRACH" motif was identified in both control  
43 and *METTL3*-deficient cells. The statistical significance of these motifs calculated by  
44 MEME showed a lower E-value than DREME, which represented more credibility  
45 (e=4.3e-124 and e=1.4e-083, respectively) (Figure R1A). Meanwhile, consistent with  
46 previous observations <sup>2,3</sup>, we found that the density of m<sup>6</sup>A peaks was markedly  
47 enriched near stop codons (Figure R1B). Furthermore, we have marked out the different  
48 m<sup>6</sup>A peak region of *PTX3* transcripts (yellow column) in the original Figure 3G  
49 (renewed as Figure 4G), showing that the *PTX3* m<sup>6</sup>A peaks were markedly enriched in  
50 control cells compared to the *METTL3*-deficient cells (red line) (Figure R1C). We have  
51 amended and added these data to the revised Figure 4.

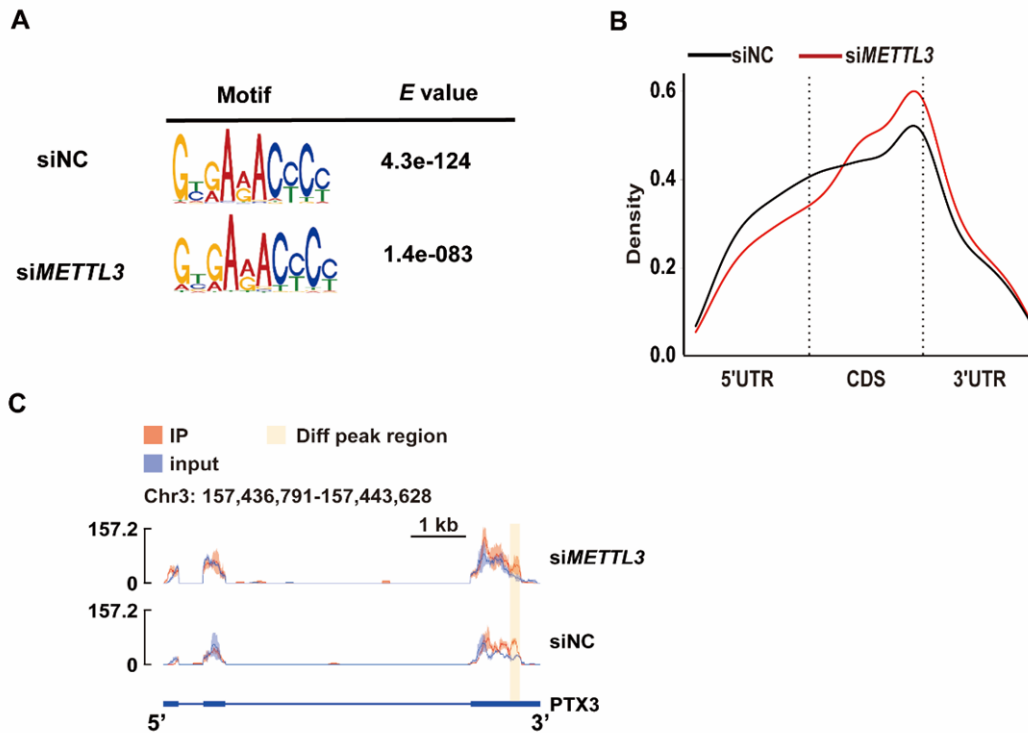

52

53 **Figure R1. Identification of METTL3 targets in macrophages through MeRIP-seq.**

54 (A) The predominant consensus m<sup>6</sup>A motif RRACH was detected in both control and  
 55 *METTL3*-deficient macrophages through m<sup>6</sup>A-seq. (B) Density distribution of m<sup>6</sup>A  
 56 peaks across mRNA transcripts. (C) Integrative Genomics Viewer (IGV) showing the  
 57 m<sup>6</sup>A abundance on *PTX3* mRNA transcripts in *METTL3*-deficient and control  
 58 macrophages as detected by m<sup>6</sup>A-seq.

59

60 *2) In Fig 3K it's not clear whether the sites that were mutated are indeed methylated.*  
 61 *This needs to be validated by an alternative approach (e.g. SCARLET, SELECT).*

62 Response:

63 We greatly appreciate the reviewer's valuable suggestion to validate the m<sup>6</sup>A sites of  
 64 *PTX3* using SELECT or SCARLET method <sup>4,5</sup>, which would reinforce the conclusion  
 65 that *METTL3* enhances the m<sup>6</sup>A modification of the 3'UTR of *PTX3*. Firstly, by  
 66 analyzing our m<sup>6</sup>A-seq data, we found that *PTX3* harbored two m<sup>6</sup>A sites in its 3' UTR  
 67 (AGA<sup>1333</sup>CT and AGA<sup>1406</sup>CA). Subsequently, the SELECT analysis demonstrated that  
 68 the relative amount of SELECT qPCR products targeting the AGA<sup>1333</sup>CT site was  
 69 significantly enhanced in the *METTL3*-deficient macrophages compared to the control,

70 whereas no significant difference was observed in the amplification of the AGA<sup>1406</sup>CA  
 71 site, implying the AGA<sup>1333</sup>CT site could be methylated by METTL3 (Figure R2A).  
 72 Furthermore, we re-performed luciferase reporter assays with the *PTX3* 3'UTR  
 73 constructs containing wild-type or mutant AGA<sup>1333</sup>CT sites (m<sup>6</sup>A<sup>1333</sup> was replaced by  
 74 T). The results showed that *METTL3* or *YTHDF3* deficiency in THP1-derived  
 75 macrophages significantly enhanced the luciferase activity of the reporter construct  
 76 carrying the AGA<sup>1333</sup>CT site of *PTX3* 3'UTR. This increase was abrogated when the  
 77 putative m<sup>6</sup>A sites were mutated (Figure R2B and R2C), suggesting that the  
 78 downregulation of *PTX3* expression by METTL3 or YTHDF3 was dependent on m<sup>6</sup>A  
 79 modification of the AGA<sup>1333</sup>CT site in its 3' UTR. We have renewed these data to the  
 80 revised Figure 4, Figure 6, and Supplementary information, respectively.  
 81

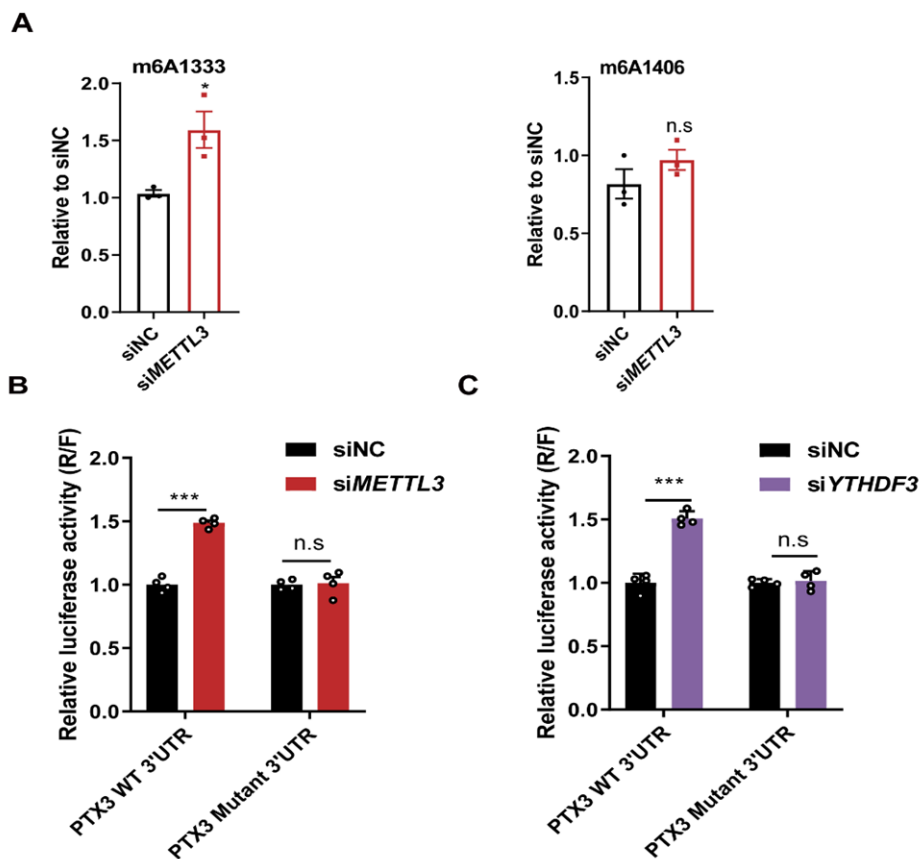

82  
 83 **Figure R2. The AGA<sup>1333</sup>CT site of *PTX3* 3'UTR is methylated by METTL3.** (A)  
 84 The relative amount of SELECT qPCR products targeting the AGA<sup>1333</sup>CT and  
 85 AGA<sup>1406</sup>CA site on *PTX3* 3'UTR using the total RNA of THP1-derived macrophages

86 transfected with *METTL3* or control siRNA. (B) Luciferase reporter and mutagenesis  
87 assays. WT or mutant *PTX3*-3'UTR vector (m<sup>6</sup>A<sup>1333</sup> was replaced by T) -transfected  
88 THP1-derived macrophages were treated with *METTL3* or control siRNA. (C)  
89 Luciferase reporter and mutagenesis assays in *YTHDF3*-deficient THP1-derived  
90 macrophages. Data are presented as means ± SEM from three independent experiments.  
91 \**P* < 0.05, \*\*\**P* < 0.001; n.s = not significant.

92

93 *3) The result of the YTHDF3 pulldown in Fig 5G is not consistent with the expectation.*  
94 *The depletion of METTL3 should lead to decrease binding of the reader to their targets.*  
95 *How do the authors explain this inconsistency?*

96 Response:

97 We apologized for the carelessness in the Figure preparation. Our m<sup>6</sup>A-seq showed that  
98 the *PTX3* m<sup>6</sup>A level was markedly enriched in control cells compared to the *METTL3*-  
99 deficient cells, whereas *PTX3* mRNA level increased substantially following *METTL3*  
100 depletion, implying the up-regulated *PTX3* transcripts carried hypo-methylated m<sup>6</sup>A  
101 peaks (Hypo-up gene) in *METTL3*-deficient macrophages.

102 Here, based on the m<sup>6</sup>A AGA<sup>1333</sup>CT site in *PTX3* transcripts, we re-performed MeRIP  
103 assays and confirmed that the enrichment m<sup>6</sup>A level of *PTX3* transcripts was  
104 significantly down-regulated in *METTL3*-deficient macrophages compared to the  
105 control cells (Figure R3A). Meanwhile, we also re-performed RIP-qPCR assays  
106 targeting the m<sup>6</sup>A AGA<sup>1333</sup>CT site in *PTX3* transcripts. As expected, *PTX3* m<sup>6</sup>A  
107 transcripts were remarkably enriched in YTHDF3-pull precipitates, while this relative  
108 enrichment was significantly decreased in *METTL3*-deficient macrophages (Figure  
109 R3B). These findings indicated that the METTL3/YTHDF3 axis modulated *PTX3* m<sup>6</sup>A  
110 modification. We have renewed these data to the revised Figure 4 and Figure 6,  
111 respectively.



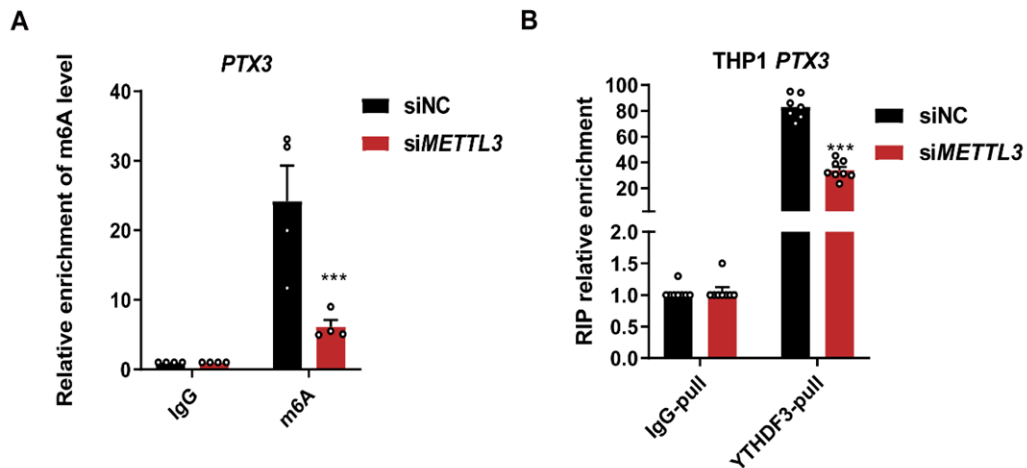

112

113 **Figure R3. METTL3/YTHDF3 axis modulates *PTX3* m<sup>6</sup>A modification.** (A)  
 114 MeRIP-qPCR assay validated the enrichment of m<sup>6</sup>A-modified *PTX3* transcripts in  
 115 *METTL3*-deficient THP1-derived macrophages. The related enrichment of m<sup>6</sup>A in each  
 116 sample was calculated by normalizing the Ct value of the m<sup>6</sup>A-IP portion to the Ct of  
 117 the corresponding input portion. (B) YTHDF3 RIP-analysis of *PTX3* m<sup>6</sup>A level in  
 118 control or *METTL3*-deficient THP1-derived macrophages. Relative enrichment was  
 119 normalized by input. Data are presented as means  $\pm$  SEM from three independent  
 120 experiments. \*\*\* $P < 0.001$ .

121

122 *4) The data concerning the PTX3/STX17 axis lacks connection with the m<sup>6</sup>A pathway.*  
 123 *The authors should demonstrate that m<sup>6</sup>A indeed regulates STX17 expression, as well*  
 124 *as autophagy. An interesting experiment would be to test whether the KD of STX17*  
 125 *rescues the decrease of autophagosomes in BMDMs derived from METTL3 KO mice.*

126 Response:

127 Thank you for the valuable suggestion to confirm METTL3/YTHDF3 m<sup>6</sup>A axis  
 128 regulates STX17 expression, as well as autophagy, which would strengthen the  
 129 connection between PTX3/STX17 axis and the m<sup>6</sup>A pathway. To address this question,  
 130 firstly, we measured the *STX17* mRNA and protein levels in both *METTL3* and  
 131 *YTHDF3*-deficient macrophages. As expected, the *STX17* mRNA and protein levels  
 132 were largely enhanced in *Mettl3* KO BMDMs, as well as in *YTHDF3* knockdown  
 133 THP1-derived macrophages (Figure R4A and R4B). Subsequently, the data confirmed

134 that stimulation by rapamycin and IL-4 led to a significant decrease of autophagosomes  
135 in both *Mettl3* KO BMDMs and *YTHDF3* knockdown THP1-derived macrophages  
136 (Figure R4C and R4D). We then transduced mRFP-GFP-LC3 lentivirus into *Mettl3* KO  
137 BMDMs and *YTHDF3* knockdown THP1-derived macrophages, respectively. As  
138 compared with the control cells, the majority of LC3 dots in both *Mettl3* KO BMDMs  
139 and *YTHDF3* knockdown THP1-derived macrophages with autophagy induction just  
140 remained RFP-positive, indicating the marked degradation of autophagosomes in these  
141 cells (Figure R4E). Lastly, to further explore whether the depletion of *Stx17* rescues the  
142 decrease of autophagosomes in *Mettl3* KO BMDMs, we performed TEM assay. The  
143 data showed that the decreased autophagosomes seen in *Mettl3* KO BMDMs could be  
144 largely reversed by the knockdown of *Stx17* (Figure R4F). Collectively, these findings  
145 suggest that METTL3/YTHDF3-m<sup>6</sup>A/PTX3/STX17 axis plays an important role in the  
146 autophagy maturation of macrophages. We have added these data to the revised Figure  
147 7 and Supplementary information.

148

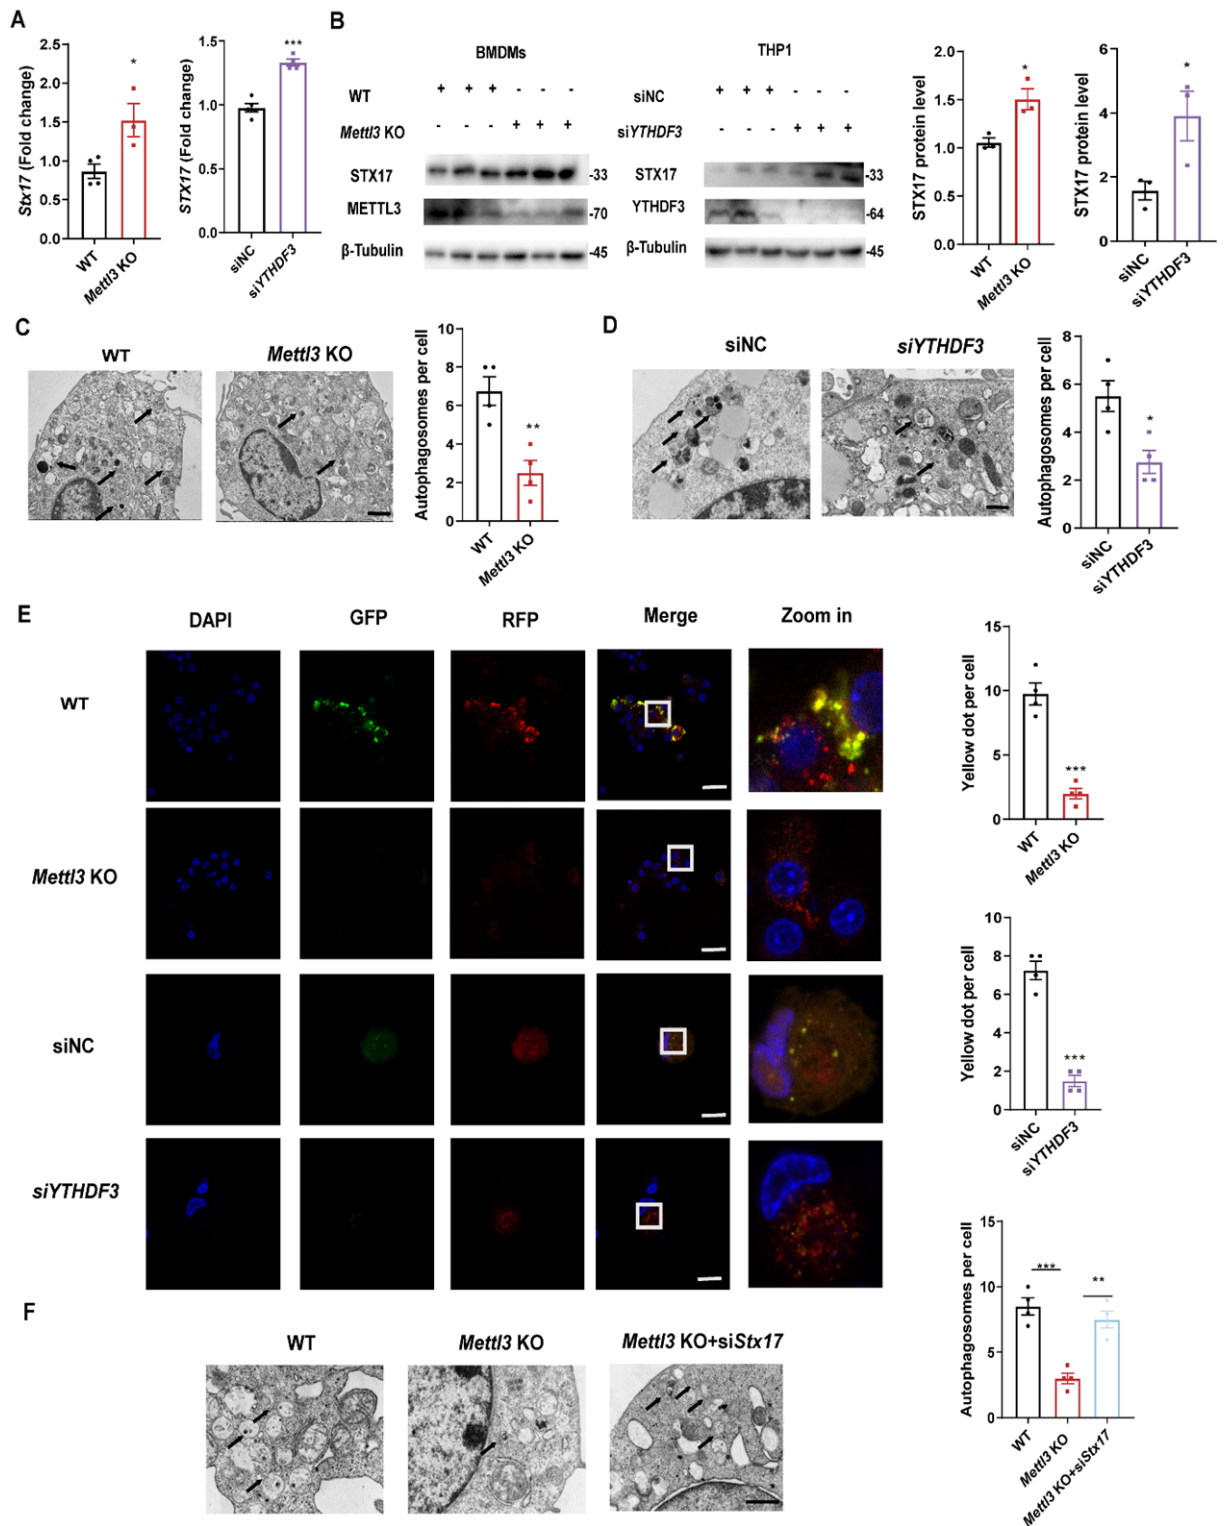

149

150 **Figure R4. METTL3/YTHDF3 axis controls autophagy maturation in**  
 151 **macrophages via an STX17-dependent manner.** (A) RT-qPCR and (B) Western blot  
 152 showing up-regulated *STX17* expression in *Mettl3* KO BMDMs and *YTHDF3*-deficient  
 153 THP1-derived macrophages, respectively. Transmission electron microscopy (TEM)  
 154 demonstrating the decreased autophagosomes in *Mettl3* KO BMDMs (C) and *YTHDF3*-

155 deficient THP1-derived macrophages (D). Scale bars, 2  $\mu\text{m}$ , and 1  $\mu\text{m}$ , respectively. (E)  
156 The autophagy flux analysis showing the number of LC3 puncta in *Mettl3* KO BMDMs  
157 and *YTHDF3*-deficient THP1-derived macrophages. Scale bars, 25  $\mu\text{m}$ , and 10  $\mu\text{m}$ ,  
158 respectively. (F) Analysis of the autophagosome number in *Mettl3* KO BMDMs with  
159 or without *siStx17* knockdown. Scale bars, 1  $\mu\text{m}$ . Data are presented as means  $\pm$  SEM  
160 from three independent experiments. \* $P < 0.05$ , \*\* $P < 0.01$ , \*\*\* $P < 0.001$ .

161

162 *5) The quality of the figures is pretty poor. There is a lack of consistency between the*  
163 *fonts of the different panels.*

164 Response:

165 We are sorry for the poor quality of the figures and the lack of consistency between the  
166 fonts of the different panels. We have amended them in the revised manuscript.

167

168 *6) How often the different western blots were performed? Some of them lack*  
169 *quantification.*

170 Response:

171 We appreciate the reviewer's reminder. We added the following description in the  
172 Statistical analysis: "For Western blot, representative figures from three biological  
173 replicates were shown". Meanwhile, we have quantified all the western blots in the  
174 revised manuscript.

175

176 *7) Some of the conclusions are too affirmative (i.e. lane 266, lanes 293-295).*

177 Response:

178 Thanks for the reviewer's suggestion. As the reviewer commented, we have modified  
179 and tuned down the statement in the revised manuscript as follows:

180 "indicating that *PTX3* is a target of METTL3".

181 "Similar observations were made in THP1-derived macrophages after *PTX3*  
182 knockdown (Supplementary Fig. 9), implying that the downregulation of *PTX3*  
183 inhibited M2 macrophage activation".

184

185 To Reviewer: 2

186 *In this manuscript, the authors convincingly show that METTL3 expression negatively*  
187 *regulates the development of alternatively activated (M2) macrophages. They perform*  
188 *experiments in mice that genetic deletion of METTL3 using the Lyz2-Cre increases*  
189 *allergic airway inflammation after cockroach sensitization and challenge compared to*  
190 *WT mice. They also use the human macrophage cell line THP to show that suppression*  
191 *of METTL3 increases M2 polarization, while THP cells that ectopically express*  
192 *METTL3 preferentially polarized to the M1 phenotype. They further show that*  
193 *phosphorylation of AKT and STAT6 were upregulated in BMDM from METTL3-*  
194 *deficient mice following IL-4 stimulation compared to BMDM from WT mice. A similar*  
195 *result was found with METTL3 knockdown in THP cells. Further studies suggested that*  
196 *PTX3 was a target for METTL3 and the authors showed that disruption of PTX3*  
197 *inhibited M2 polarization with genetic depletion of METTL3. Additionally, inhibition*  
198 *of PTX3 reduced the increased airway mucus expression, eosinophilia, and airway*  
199 *responsiveness in the cockroach sensitized and challenged METTL3 KO, seemingly*  
200 *closing the loop on the mechanism. Lastly, loss of METTL3 impaired the YTHDF3-*  
201 *mediated degradation of PTX3 mRNA, showing that YTHDF3 inhibition of PTX3 was*  
202 *critical for METTL3 inhibition of the M2 phenotype.*

203 Response:

204 We thank the reviewer for carefully reading our manuscript and appreciate the helpful  
205 comments and critical questions. We have studied these issues carefully and provided  
206 our responses point to point as listed below. And based on these suggestions and  
207 questions, we have made changes to the original manuscript to improve our manuscript.  
208 We hope that the revised manuscript would be better for the readers to understand our  
209 points and finally meet with your approval to get published.

210

211 *1) First, a major unanswered question is how does the deletion of METTL3 in*  
212 *macrophages change allergen-induced mucus in the airway, airway eosinophils, and*

213 *airways responsiveness to methacholine? The authors show that STAT6 is upregulated*  
214 *in the macrophages, but how does this regulate an overall increase in Th2 inflammation?*  
215 *In figure 1, the authors do not measure Th2 cytokines in the lungs or BAL fluid. Does*  
216 *the change in macrophage expression of METTL3 have an effect on the recruitment or*  
217 *activation of CD4+ T lymphocytes or the chemokines that recruit Th2 cells to the lung?*  
218 *This could be evaluated by intracellular flow cytometry examining the CD4+*  
219 *compartment for the production of these cytokines. Also, the BAL and lung*  
220 *homogenates could be assessed for chemokines associated with CD4+ Th2 cell*  
221 *recruitment. How inhibition of METTL3 regulates the cardinal features of asthma in*  
222 *the allergen-challenge model needs to be clearly and comprehensively defined.*

223 **Response:**

224 We greatly appreciate the reviewer's suggestion to measure Th2 cytokines in the lungs  
225 in vivo mouse models, which would reinforce the conclusion that METTL3 plays a key  
226 role in allergic asthma development via M2 macrophage activation.

227 Allergic asthma has been generally considered as a Th2 cell-mediated chronic immune  
228 response, although Th1 cell/Th17 cell immunity may involve certain aspects of this  
229 disease <sup>6, 7</sup>. Th2 cells produce effector cytokines such as IL-4, IL-5, and IL-13 to  
230 mediate respiratory symptoms, correlating with the degree of airway eosinophilia. More  
231 importantly, recent studies reveal that M2 macrophage activation plays a crucial role in  
232 allergic asthma through expressing high levels of chemokines, including CCL-17,  
233 CCL-22, and CCL-24 <sup>8</sup>. The release of these cytokines results in the recruitment of Th2  
234 cells and amplification of polarized Th2 responses, leading to the infiltration of  
235 eosinophil infiltration into the bronchial tissues <sup>9, 10</sup>. To further determine whether  
236 *METTL3* depletion promotes Th2 responses in allergic inflammation via M2  
237 macrophage activation, the levels of M2-associated chemokines (i.e., *Ccl-17*, and *Ccl-*  
238 *22*) in alveolar macrophages were tested. We found that the mRNA levels of *Ccl-17* and  
239 *Ccl-22* were significantly elevated in alveolar macrophages from CRE-challenged  
240 *Mettl3* KO mice, compared to CRE-challenged WT animals (Figure R5A). Furthermore,  
241 compared to WT mice, the mRNA and protein levels of Th2 cell-associated cytokines

242 (i.e., *IL-4*, and *IL-13*) were markedly increased in lung homogenates from CRE-  
 243 challenged *Mettl3* KO mice, whereas the Th1 cell-associated cytokine (*ifng*) showed  
 244 downregulated expression and the Th17 cell-associated cytokine (*Il-17a*) had no  
 245 difference (Figure R5B and R5C). Lastly, we demonstrated that IL-4-producing Th2  
 246 cells were also enhanced in the Mediastinal lymph nodes (MLNs) from CRE-  
 247 challenged *Mettl3* KO mice, while IFN-gamma-producing Th1 cells were  
 248 comparatively reduced (Figure R5D). Thus, the above findings suggest that *Mettl3*  
 249 deficiency promotes Th2 responses and accelerates airway inflammation in allergic  
 250 asthma via M2 macrophage activation. We have added these data to the revised Figure  
 251 3.

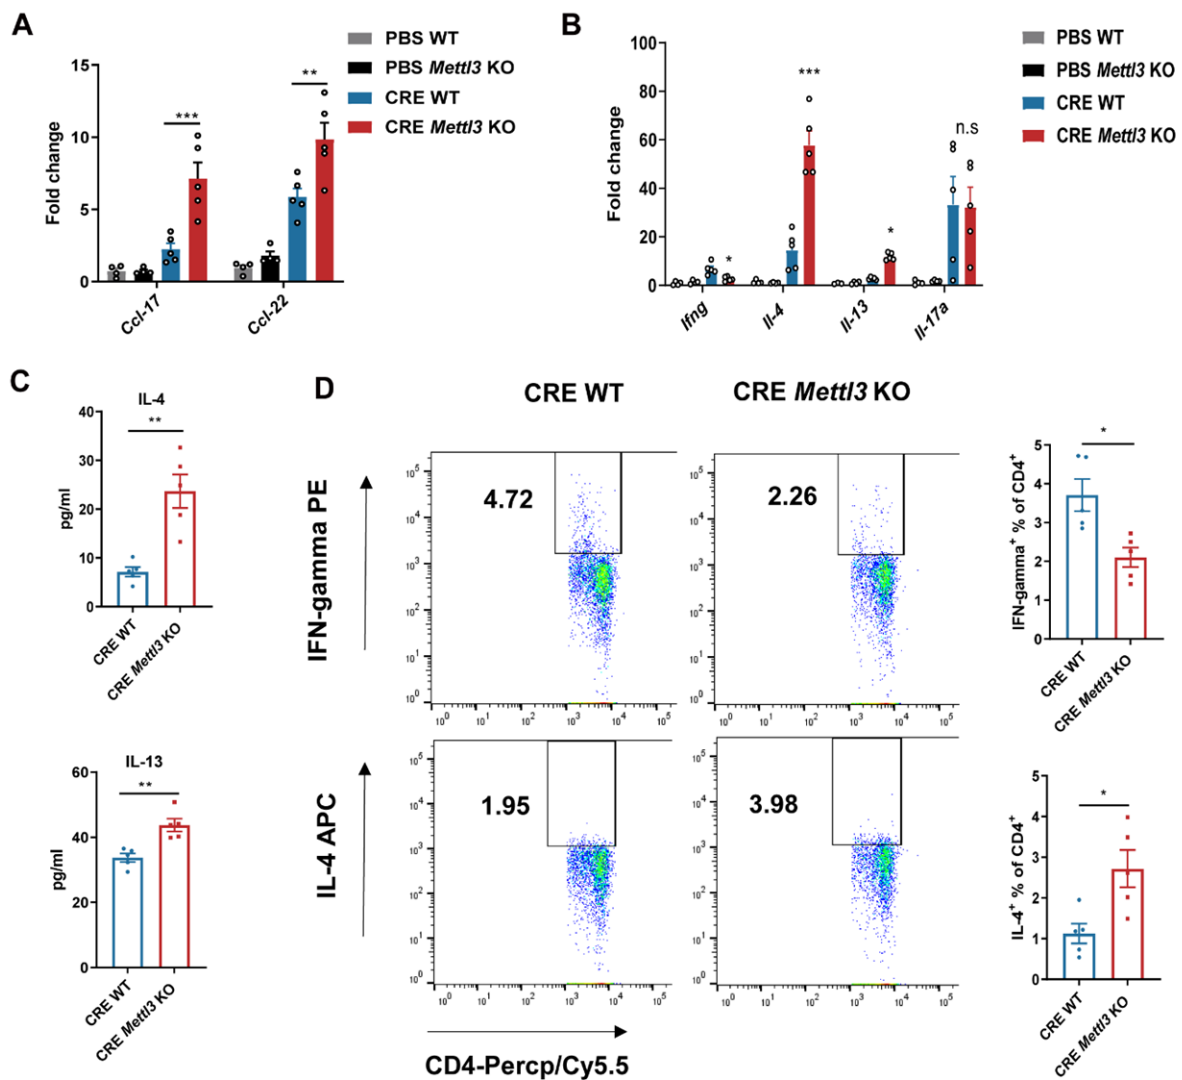

252

253 **Figure R5. *Mettl3* deficiency promotes Th2 responses in allergic asthma via M2**



254 **macrophage activation.** (A) RT-qPCR showing up-regulated M2-associated  
255 chemokines in alveolar macrophages purified from CRE allergen-induced asthma  
256 models. The levels of Th1, Th2, and Th17 cell-associated cytokines in lung  
257 homogenates were detected by RT-qPCR (B) and ELISA (C), respectively. (D) Flow  
258 cytometry analysis of the frequency of CD4<sup>+</sup>IL-4<sup>+</sup>Th2 cells and CD4<sup>+</sup>IFN-gamma<sup>+</sup>Th1  
259 cells in MLNs from mice. Data are presented as means ± SEM and representative of  
260 two independent experiments. \**P* < 0.05, \*\**P* < 0.01, \*\*\**P* < 0.001; n.s = not significant.

261

262 *2) Second, in line 136, the title of this section, the authors state "Low METTL3*  
263 *expression in macrophages from children with allergic asthma is associated with*  
264 *severe disease." This is an extremely misleading statement because it gives the*  
265 *impression that the authors were studying tissue derived macrophages, when they were*  
266 *instead collecting PBMC and then in vitro stimulating the cells to develop a*  
267 *macrophage phenotype. This is very different from what they imply that there are doing*  
268 *in the title. Ideally, the authors would be examining alveolar macrophages from*  
269 *children because the blood PMBC compartment may not reflect what is transpiring in*  
270 *the lung macrophage. While it is difficult to obtain alveolar macrophages from children*  
271 *with asthma due to the safety concerns associated with bronchoscopy from this*  
272 *population, it does not excuse the authors for being inaccurate in their portrayal of the*  
273 *cells they used in their assays and also to acknowledge the limitation of this approach*  
274 *in the discussion.*

275 Response:

276 We are sorry for the inaccurate description in the Results. We have now amended it as  
277 follows: "Low *METTL3* expression in monocyte-derived macrophages from children  
278 with allergic asthma is associated with disease severity". Meanwhile, to exclude any  
279 misunderstanding, we corrected "macrophages" to "monocyte-derived macrophages"  
280 in the part of clinical samples analysis.

281 Since it is difficult to obtain alveolar macrophages from childhood asthma due to safety  
282 concerns, we further added the limitation of this approach in the revised discussion as



283 follows: “In addition, although our studies with monocyte-derived macrophages in  
284 children with allergic asthma and myeloid cells in animal models have suggested a  
285 crucial role for METTL3/m<sup>6</sup>A modification in the development of allergic asthma  
286 mediated by macrophage activation, lung tissue-resident macrophages evidence for this  
287 phenotype in childhood asthma is lacking, warranting further studies”.

288

289 *3) The third issue is that the authors did not perform the correct statistical tests. For*  
290 *instance, in line 781 a two-way ANOVA should have been used rather than a one-way*  
291 *ANOVA since there were two factors being assessed - the response to cockroach*  
292 *allergen challenge and the genetics of the mice. More critically, in line 782, the authors*  
293 *state that they used a Pearson correlation, and this is not the correct test as the data*  
294 *certainly does not appear to be normally distributed. Therefore, the authors used have*  
295 *used the nonparametric Spearman correlation, which likely will negate the statistical*  
296 *significance that they report. All the correlation analyses should be performed using*  
297 *the appropriate statistical test and it appears that these correlations may not be*  
298 *significant as they are being driven by a very few values at the extremes of the data set*  
299 *in several of the analyses.*

300 Response:

301 We are really sorry for our careless mistakes in statistical analysis. Here, we re-  
302 performed data analysis between multiple groups by the two-way ANOVA with the  
303 post-hoc Bonferroni test. The results showed that this analysis didn't change our  
304 original conclusion. We have renewed these data in the revised manuscript.

305 Meanwhile, we sincerely appreciate the reviewer's comments on the correlation  
306 analysis. We carefully analyzed the data again using Spearman correlation, and found  
307 that some asthma patients had the extremes levels of eosinophils number and FeNO,  
308 leading to the clear outliers. Although the outliers straightforwardly support our  
309 correlation analysis, it may mislead the readers that the statistical significance we got  
310 here is attributed to these outliers. Thus, to make the result more convincible, we  
311 excluded these outliers, and recruited another fifteen new children with allergic asthma

312 and ten healthy controls. After the addition of these samples and excluding the previous  
313 outliers (total of 50 normal controls and 50 asthma patients), we re-performed the  
314 Spearman correlation analysis. Consistent with our previous conclusion, the results  
315 suggested that the expression of *METTL3* in monocyte-derived macrophages from  
316 children with allergic asthma was negatively correlated with disease severity, while the  
317 PTX3 circulating levels showed a positive correlation with asthma severity (Figure R6).  
318 Thus, in the revised manuscript, we used Figure R6 instead of original data to make  
319 reader clear.

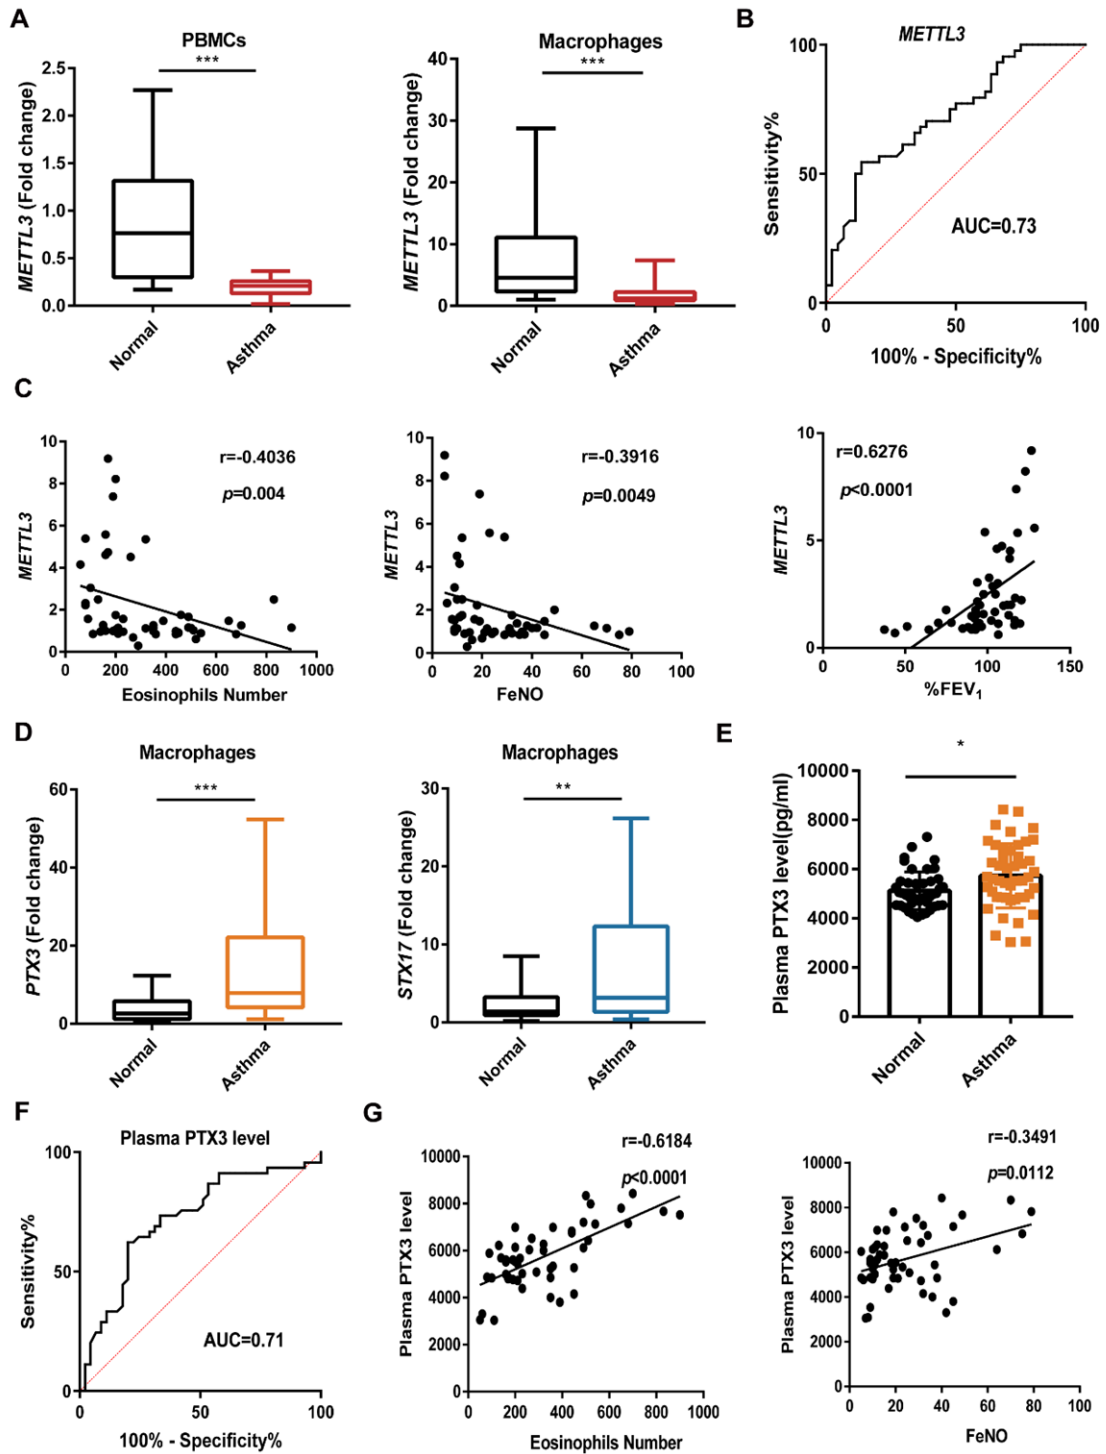

320

321 **Figure R6. Clinical correlation between METTL3, PTX3 and disease severity in**  
 322 **childhood allergic asthma.** (A) The transcripts levels of *METTL3* in PBMCs and  
 323 monocyte-derived macrophages from 50 childhood allergic asthma and 50 healthy  
 324 controls, respectively. (B) ROC curve analysis of monocyte-derived macrophages  
 325 *METTL3* levels in childhood asthma. (C) Spearman correlation analysis of monocyte-

326 derived macrophages *METTL3* expression, blood eosinophils number, FeNO,  
 327 and %FEV<sub>1</sub> levels in childhood asthma. (D) Elevated levels of *PTX3* and *STX17* in  
 328 monocyte-derived macrophages from childhood asthma relative to healthy subjects. (E)  
 329 The upregulated protein levels of *PTX3* in plasma from childhood asthma and (F) ROC  
 330 curve analysis. (G) Spearman correlation analysis between *PTX3* protein levels and  
 331 blood eosinophils numbers, or FeNO in childhood asthma. \**P* < 0.05, \*\**P* < 0.01, \*\*\**P*  
 332 < 0.001.

333

334 4) Figure 5E- It is not clear why the total *STAT6* is changing in this blot. Total cellular  
 335 *STAT6* does not change with increases in *p-STAT6*.

336 Response:

337 We apologized for the carelessness in the Figure preparation. We re-performed the  
 338 western bolt assay and amended it as follows (Figure R7):

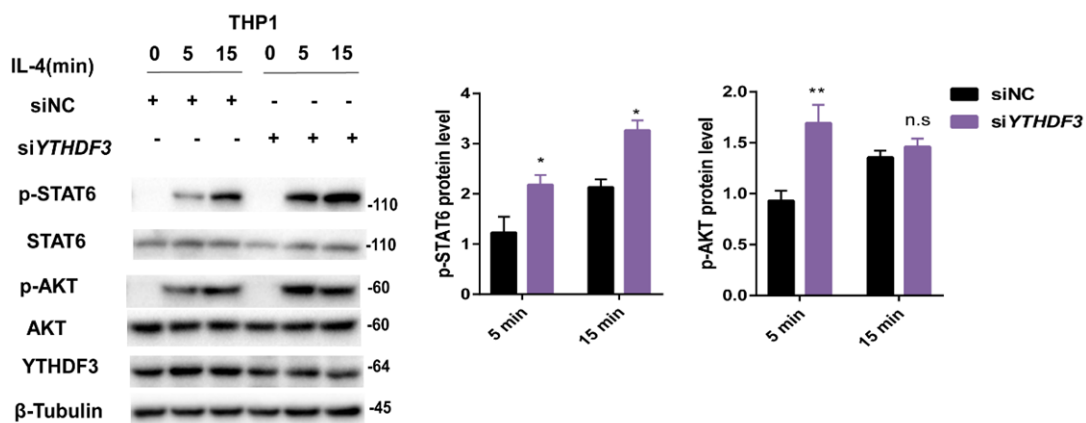

339

340 **Figure R7. Elevated levels of p-AKT and p-STAT6 in *YTHDF3*-deficient THP1-**  
 341 **derived macrophages were detected.** \**P* < 0.05, \*\**P* < 0.01; n.s = not significant.

342

343 To Reviewer: 3

344

345 *In the current studies, Xiao Han et. al., observed a decrease in the expression of m6A*  
 346 *methyltransferase, METTL3, in peripheral blood macrophages that was associated*  
 347 *with the severity of childhood allergic asthma. They further showed that knockout of*

348 *Mettl3* in myeloid cells skewed macrophages towards an M2-like phenotype and resulted  
349 in exacerbated allergen-driven airway inflammation in vivo. Mechanistic studies  
350 demonstrated that loss of *METTL3* impaired the m6A-YTHDF3-dependent degradation  
351 of *PTX3* mRNA, which was associated with enhanced allergic airway inflammation and  
352 childhood asthma severity. Finally, a role for *PTX3* regulating autophagy maturation  
353 in macrophages by reducing *STX17* expression is shown. The findings presented in the  
354 study are novel and may have important therapeutic implications pertinent to targeting  
355 m6A methyltransferase *METTL3* signaling in the context of allergic asthma. However,  
356 there are several issues that need to be addressed to strengthen the findings proposed.

357 Response:

358 We thank the reviewer for carefully reading our manuscript and appreciate the helpful  
359 comments and critical questions. We have studied these issues carefully and provided  
360 our responses point to point as listed below. And based on these suggestions and  
361 questions, we have made changes to the original manuscript to improve our manuscript.  
362 We hope that the revised manuscript would be better for the readers to understand our  
363 points and finally meet with your approval to get published.

364

365 *1) Crossing *Mettl3*<sup>fl/fl</sup> mice with *Lyz2*-Cre mice to ablate *Mettl3* in the myeloid  
366 compartment does not solely target macrophages/monocytes, but also granulocytes and  
367 more specifically neutrophils. The authors need to investigate *Mettl3* expression in  
368 airway neutrophils and explore their phenotype in *Mettl3*<sup>-/-</sup> mice, as depletion of *Mettl3*  
369 in neutrophils may also contribute to the observed exacerbated allergic airway disease.*

370 Response:

371 We sincerely appreciate the reviewer's reminder. Although allergic asthma is classically  
372 associated with eosinophilia and Th2 cytokines, neutrophils may involve certain aspects  
373 of this disease <sup>6</sup>. To address this question, we first purified neutrophils from the bone  
374 marrow of the experimental mice using the EasySep Mouse Neutrophil Enrichment Kit  
375 (STEMCELL). Neutrophils from the *Lyz2*-Cre conditional *Mettl3* KO mice showed a  
376 reduction in *METTL3* protein levels (Figure R8A). Compared to WT mice, no apparent

377 abnormalities of neutrophils from the bone marrow were noted in *Mettl3* KO mice  
378 (Figure R8B). Next, in the CRE-challenged allergic asthma model, we detected Gr1  
379 expression in lung tissues through immunohistochemistry (IHC). Much higher numbers  
380 of Gr1<sup>+</sup> neutrophils were detected after CRE challenge as compared with PBS-treated  
381 mice. Noticeably, compared with CRE-treated WT mice, the infiltration of Gr1<sup>+</sup>  
382 neutrophils was enhanced in CRE-treated *Mettl3* KO mice (Figure R8C). To further  
383 examine whether the accelerated airway inflammation in *Mettl3* KO mice was related  
384 to the neutrophils, we depleted the neutrophils in CRE-induced asthma models by i.p  
385 injecting anti-Ly6G Ab or isotype control Ab <sup>11</sup>. Flow cytometry analysis confirmed a  
386 marked reduction in the percentages of neutrophil infiltration in BALF from mice  
387 treated with anti-Ly6G Ab (Figure R8D). Meanwhile, we found that the depletion of  
388 neutrophils by anti-Ly6G Ab could not abrogate the increased airway inflammation  
389 phenotype of *Mettl3* KO mice (Figure R8E-G). The above findings indicated that the  
390 function of METTL3 in allergic airway inflammation was not dependent on neutrophils.  
391 We have added these data to the revised Supplementary information.

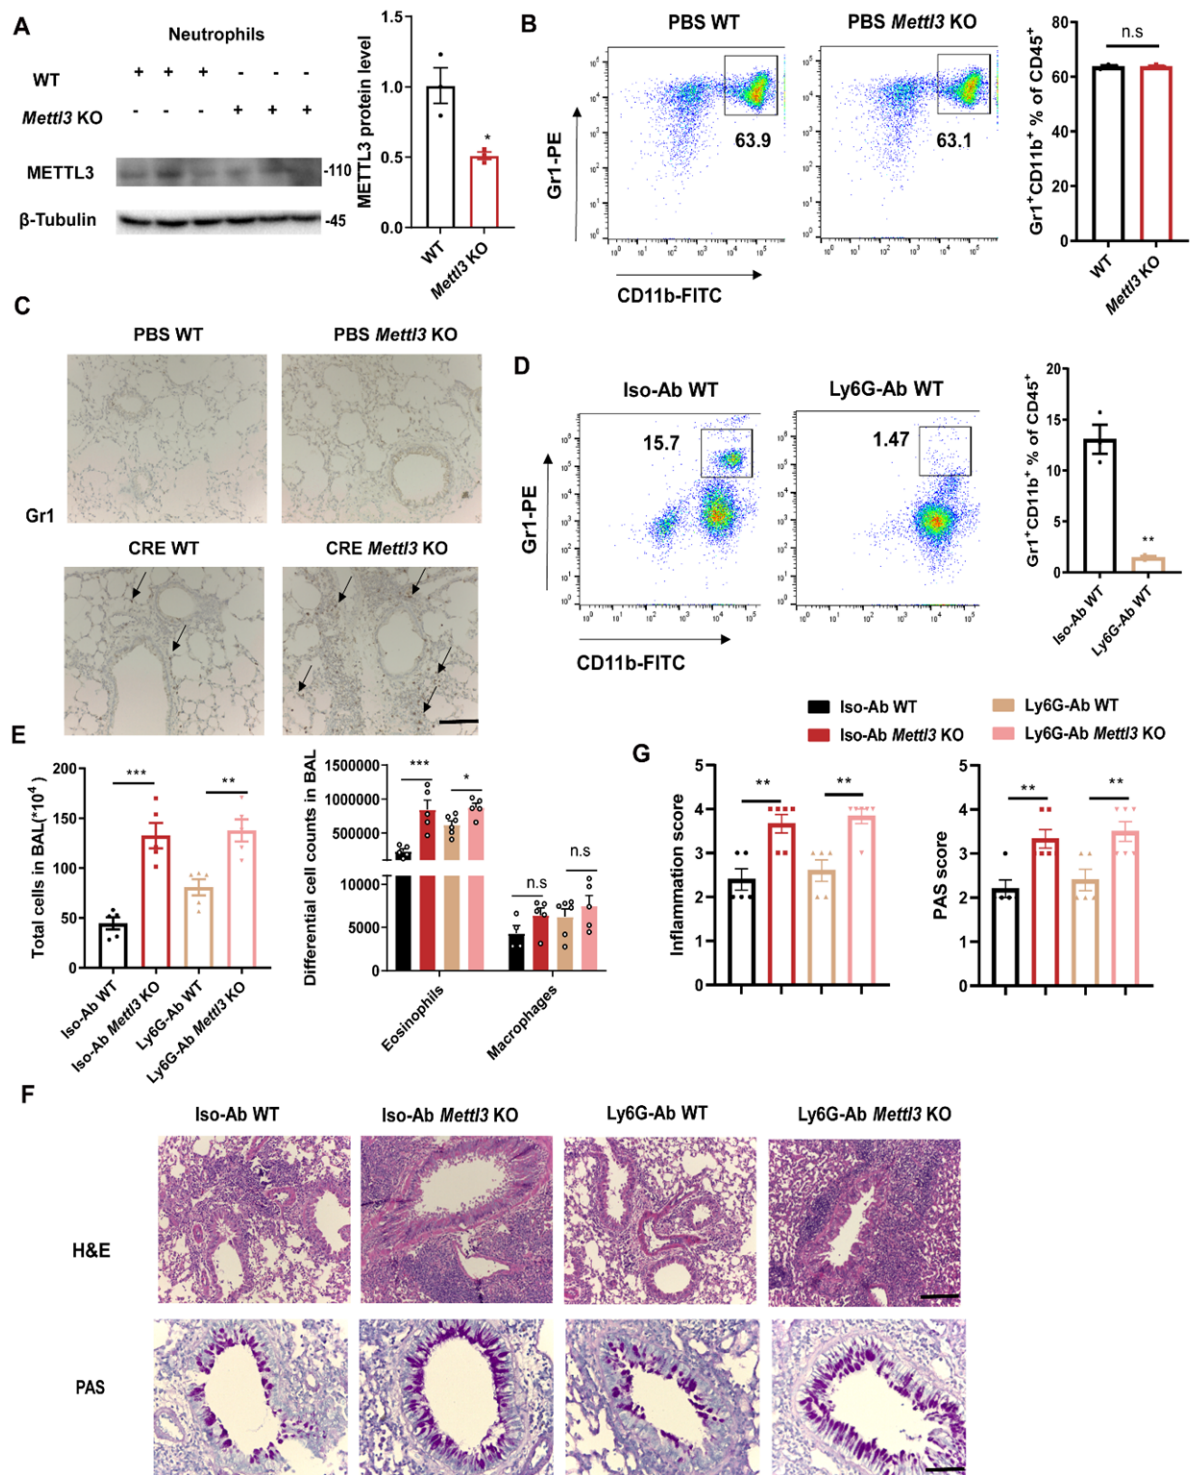

392

393 **Figure R8. Depletion of neutrophils does not reduce the differences of airway**

394 **inflammation between *Mettl3* KO and WT mice.** (A) Western blot showing reduced

395 METTL3 protein levels in neutrophils purified from the bone marrow of the

396 experimental mice. (B) The percentage of neutrophils from the bone marrow was

397 detected in *Mettl3* KO and WT mice by flow cytometry. (C) Representative images of

398 Gr1 expression in lung tissues using IHC. Scale bars: 200  $\mu$ m. Every 72 h during CRE  
399 treatment, mice were i.p. injected with 200  $\mu$ g anti-Ly6G mAb or isotype control mAb,  
400 (D) Flow cytometry analysis of the efficiency of neutrophils depletion in BALF. (E)  
401 Total and differential BALF cell numbers, and (F) histopathological changes in the lung  
402 tissues were examined. Scale bars: 200  $\mu$ m and 100  $\mu$ m, respectively. (G) Calculated  
403 inflammation and PAS scores. Data are presented as means  $\pm$  SEM and representative  
404 of two independent experiments. \* $P$  < 0.05, \*\* $P$  < 0.01, \*\*\* $P$  < 0.001; n.s = not  
405 significant.

406

407 *2) The authors should explore Th1, Th17 and Th2 cell-associated cytokine release in*  
408 *the BAL and/or lung homogenates to inform on the effects of Mettl3 deficiency on the*  
409 *type of the allergic response.*

410 Response:

411 Thank the reviewer for the valuable suggestion. Allergic asthma has been generally  
412 considered as a Th2 cell-mediated chronic immune response, although Th1 cell/Th17  
413 cell immunity may involve certain aspects of this disease<sup>6,7</sup>. Th2 cells produce effector  
414 cytokines such as IL-4, IL-5, and IL-13 to mediate respiratory symptoms, correlating  
415 with the degree of airway eosinophilia. More importantly, recent studies reveal that M2  
416 macrophage activation plays a crucial role in allergic asthma through expressing high  
417 levels of chemokines, including CCL-17, CCL-22, and CCL-24<sup>8</sup>. The release of these  
418 cytokines results in the recruitment of Th2 cells and amplification of polarized Th2  
419 responses, leading to the infiltration of eosinophil infiltration into the bronchial tissues  
420<sup>9,10</sup>. To further determine whether *Mettl3* depletion promotes Th2 responses in allergic  
421 inflammation via M2 macrophage activation, the levels of M2-associated chemokines  
422 (i.e., *Ccl-17*, and *Ccl-22*) in alveolar macrophages were tested. We found that the  
423 mRNA levels of *Ccl-17* and *Ccl-22* were significantly elevated in alveolar macrophages  
424 from CRE-challenged *Mettl3* KO mice compared to CRE-challenged WT animals  
425 (Figure R5A). Furthermore, compared to WT mice, the mRNA and protein levels of  
426 Th2 cell-associated cytokines (i.e., *IL-4*, and *IL-13*) were markedly increased in lung



427 homogenates from CRE-challenged *Mettl3* KO mice, whereas the Th1 cell-associated  
 428 cytokine (*ifng*) showed downregulated expression and the Th17 cell-associated  
 429 cytokine (*Il-17a*) had no difference (Figure R5B and R5C). Lastly, we demonstrated  
 430 that IL-4-producing Th2 cells were also enhanced in the Mediastinal lymph nodes  
 431 (MLNs) from CRE-challenged *Mettl3* KO mice, while IFN-gamma-producing Th1  
 432 cells were comparatively reduced (Figure R5D). Thus, the above findings suggest that  
 433 *Mettl3* deficiency promotes Th2 responses and accelerates airway inflammation in  
 434 allergic asthma via M2 macrophage activation. We have added these data to the revised  
 435 Figure 3.

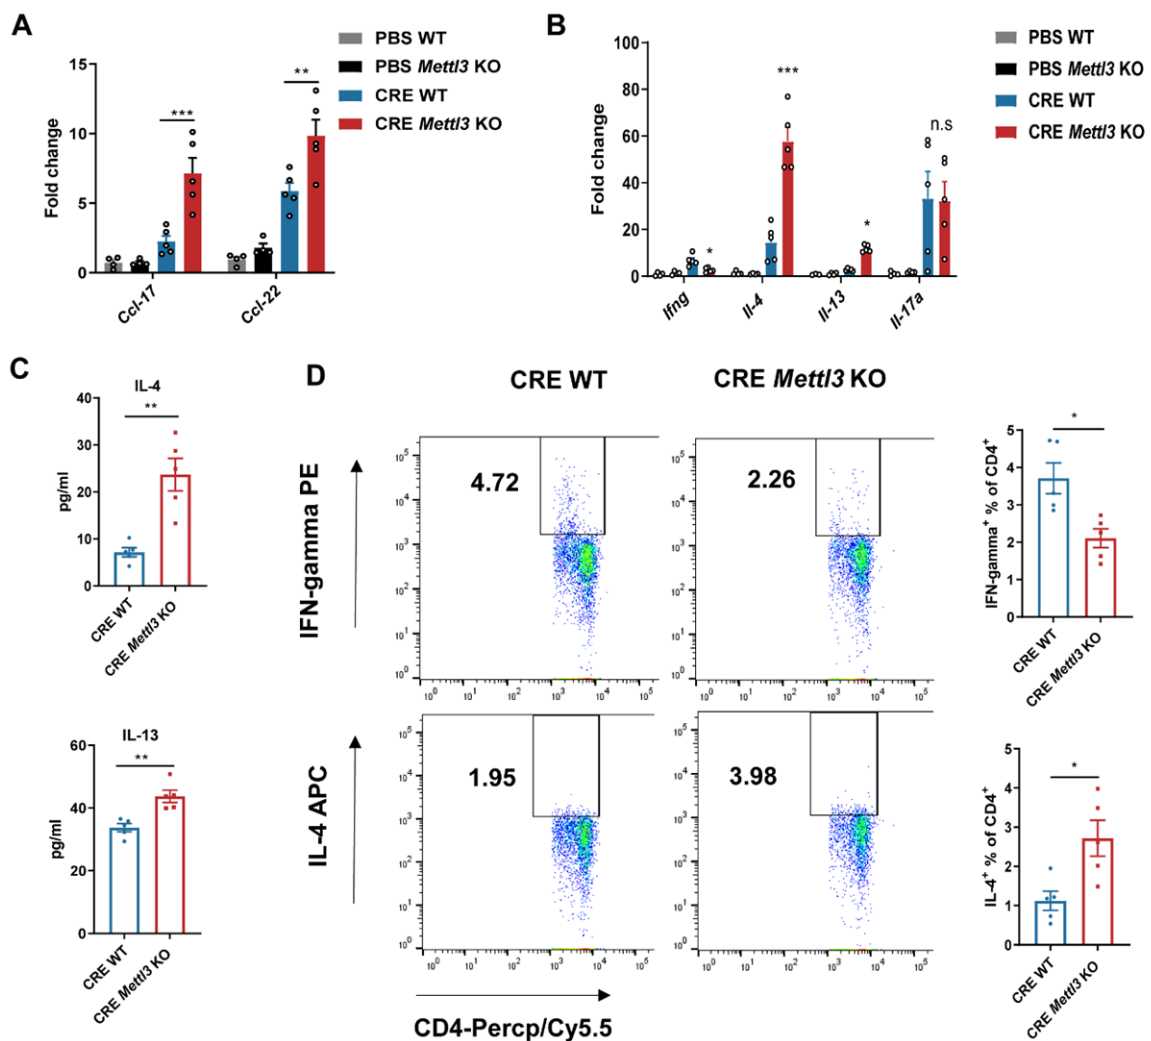

436  
 437 **Figure R5. *Mettl3* deficiency promotes Th2 responses in allergic airway**  
 438 **inflammation via M2 macrophage activation.** (A) RT-qPCR showing up-regulated  
 439 M2-associated chemokines in alveolar macrophages purified from CRE allergen-

440 induced asthma models. (B) (C) The levels of Th1, Th2, and Th17 cell-associated  
441 cytokines in lung homogenates were detected by RT-qPCR and ELISA, respectively.  
442 (D) Flow cytometry analysis of the frequency of CD4<sup>+</sup>IL-4<sup>+</sup>Th2 cells and CD4<sup>+</sup>IFN-  
443 gamma<sup>+</sup>Th1 cells in MLNs from mice. Data are presented as means ± SEM and  
444 representative of two independent experiments. \**P* < 0.05, \*\**P* < 0.01, \*\*\**P* < 0.001;  
445 n.s = not significant.

446

447 *3) What was the phenotype (M1 vs M2) of airway-infiltrating macrophages in the*  
448 *mettl3<sup>-/-</sup> mice?*

449 Response:

450 Thank you for the valuable suggestion. Alveolar macrophages are critical resident cells  
451 in the alveolus, which are important for both lung homeostasis and the response to  
452 injury. Recently studies have confirmed that there are two ontologically distinct  
453 populations of alveolar macrophages. Tissue-resident alveolar macrophages (TR-AMs)  
454 differentiate shortly after birth and persist over the lifespan via self-renewal. Monocyte-  
455 derived alveolar macrophages (Mo-AMs) develop from circulating monocytes and are  
456 recruited to the lung during injury <sup>12</sup>. Generally, alveolar macrophages are identified  
457 based on the expression of specific surface markers such as CD11c, CD64, F4/80,  
458 MerTK, and Siglec F. Furthermore, differences in the levels of expression of Siglec F  
459 allow for discrimination of Mo-AMs (CD11C<sup>+</sup>SiglecF<sup>int/low</sup>) and TR-AMs  
460 (CD11C<sup>+</sup>SiglecF<sup>high</sup>) during the course of lung injury <sup>13</sup>. In our study, flow cytometry  
461 analysis confirmed that compared with CRE-treated WT mice, the percentage of M2  
462 macrophages (CD206<sup>+</sup>CD86<sup>-</sup>) in Mo-AMs from BALF was higher in CRE-treated  
463 *Mettl3* KO mice, while the percentage of M1 macrophages (CD86<sup>+</sup>CD206<sup>-</sup>) decreased  
464 (Figure R9). These data imply that *Mettl3* deficiency promotes M2 macrophage  
465 activation in Mo-AMs during airway inflammation. We hope this evidence will be  
466 helpful.

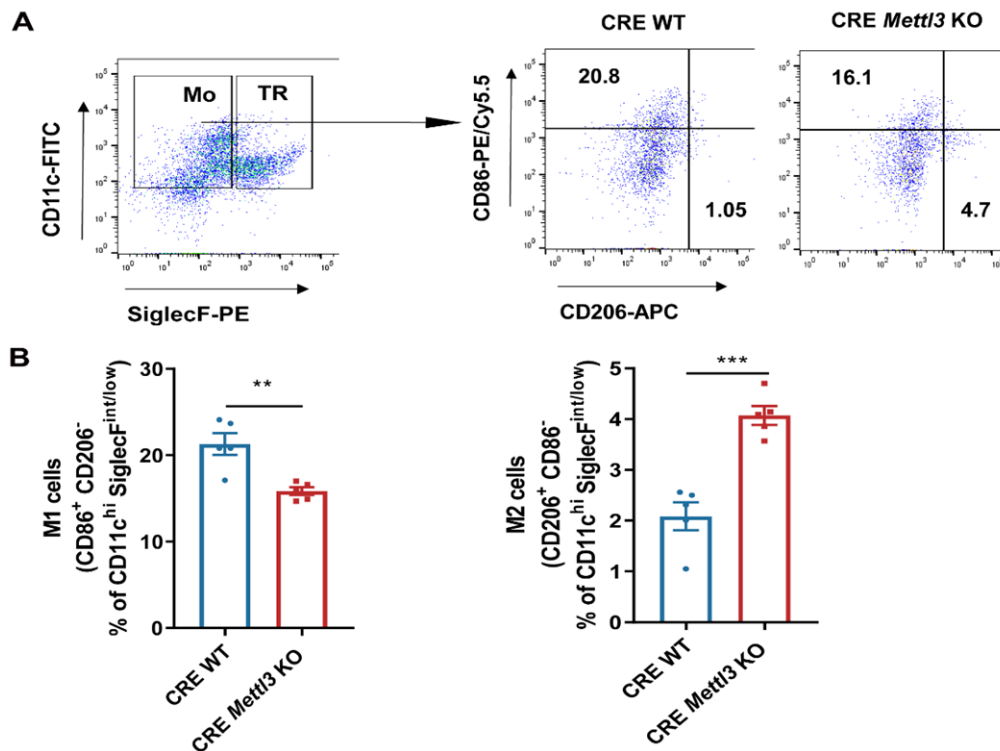

467

468 **Figure R9. *Mettl3* deficiency promotes M2 macrophage activation in Mo-AMs**

469 **during airway inflammation.** (A) Representative flow cytometry plots gated on

470 CD45<sup>+</sup> living cells isolated from BALF from CRE-treated WT and *Mettl3* KO mice.

471 CD11c<sup>high</sup>SiglecF<sup>int/low</sup> Mo-AMs; CD11c<sup>high</sup>SiglecF<sup>high</sup> TR-AMs; CD86<sup>+</sup>CD206<sup>-</sup> M1

472 macrophages; CD206<sup>+</sup>CD86<sup>-</sup> M2 macrophages. (B) The percentage of M1 and M2

473 macrophages in Mo-AMs was quantified. Data are presented as means  $\pm$  SEM and

474 representative of two independent experiments. \*\* $P < 0.01$ , \*\*\* $P < 0.001$ .

475

476 *4) What were the protein levels of Mettl3 in the peripheral blood macrophages in*

477 *children with asthma compared to controls?*

478 Response:

479 We sincerely appreciate the reviewer's reminder. Western blot analysis verified that the

480 protein levels of METTL3 in monocyte-derived macrophages from children with

481 allergic asthma were markedly reduced, as compared with normal controls (Figure R10).

482 We have added these data to the revised Supplementary information.

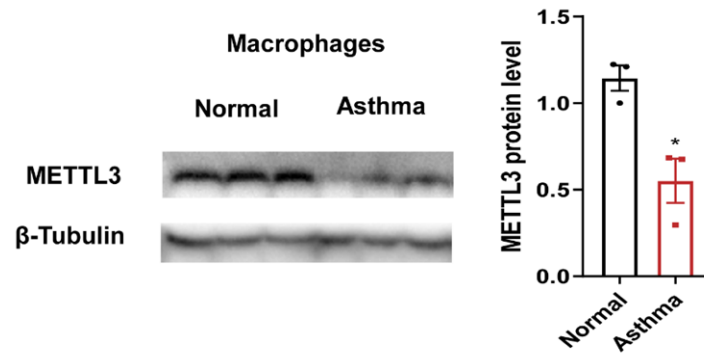

483

484 **Figure R10. The Lower METTL3 levels in monocyte-derived macrophages from**  
 485 **children with allergic asthma.** The METTL3 protein levels were determined in  
 486 monocyte-derived macrophages from children with allergic asthma and healthy  
 487 controls by Western blot. \* $P < 0.05$ .

488

489 *5) How did the authors define asthma severity? Increased eosinophilic inflammation is*  
 490 *not the only marker of disease severity. What about exacerbation frequencies? Which*  
 491 *types of medications were these patients on when these measurements were made?*

492 Response:

493 Thanks for the reviewer's suggestion. The current concept of asthma severity,  
 494 recommended by GINA and most asthma guidelines, is that it should be assessed  
 495 retrospectively from how difficult the patient's asthma is to treat<sup>14, 15</sup>. In our study,  
 496 asthma severity was estimated using the medication use information reported in  
 497 outpatient pharmacy records according to step-treatment recommendations by the  
 498 GINA criteria, assessment of asthma control using the Childhood Asthma Control Test  
 499 (C-ACT), frequency of asthma exacerbations, and lung function. Here, we defined that  
 500 mild asthma was well controlled with low-intensity treatment, i.e., as-needed low-dose  
 501 ICS-formoterol, or low-dose ICS plus as-needed SABA, while moderate asthma was  
 502 defined as asthma that was well controlled with Step 3 or Step 4 treatment e.g. with  
 503 low- or medium-dose ICS-LABA in either treatment track. Meanwhile, we defined  
 504 severe asthma that remained uncontrolled despite optimized treatment with high-dose  
 505 ICS-LABA, or that required high-dose ICS-LABA to prevent it from becoming  
 506 uncontrolled.

507 However, reliance on the type/dose of prescribed medication and symptom control does  
508 not adequately capture those at risk of adverse outcomes, suggesting the importance of  
509 biomarkers for risk and treatment stratification <sup>16</sup>. Noticeably, accumulating studies  
510 have demonstrated that eosinophilic inflammation is frequently associated with  
511 increased asthma severity, while the use of peripheral blood eosinophil counts as a  
512 biomarker for increased disease burden or exacerbation risk is more attractive and  
513 feasible <sup>16, 17, 18</sup>. Most patients with allergic asthma have predominant type 2  
514 inflammation-mediated disease, and eosinophilic inflammation appears to be close to  
515 the risk of asthma exacerbations and loss of asthma control with inhaled corticosteroid  
516 withdrawal <sup>16, 17</sup>. Thus, in our study, a composite type-2 biomarker of blood eosinophils  
517 and FeNO was used to improve the prediction of asthma attacks. We hope this evidence  
518 will be useful.

519

520 *6) Why did the authors use THP-1 monocytes and not peripheral blood macrophages*  
521 *or BMDMs for the Mettl3 knockdown or overexpression experiments? The authors*  
522 *observations need to be validated in a more physiologically relevant system.*

523 Response:

524 Thanks for the reviewer's comments. In the present study, we detected the effect of  
525 METTL3 on macrophage homeostasis using both BMDMs and THP1-derived  
526 macrophages, which ensured functional conservation between human and mouse  
527 species. Combining with BMDMs from WT and *Mettl3* KO mice, we highlighted the  
528 critical role of m<sup>6</sup>A in regulating macrophage activation. Meanwhile, we also confirmed  
529 that overexpressed *Mettl3* (*Mettl3* LV) promoted M1 and inhibited M2 macrophage  
530 activation in BMDMs (Figure R11). Since the isolation of macrophages from childhood  
531 asthma PBMCs is relatively laborious, to further determine the potential importance of  
532 METTL3 in humans, we used the THP1-derived macrophages to perform the  
533 knockdown or overexpression experiments. It is well-known that PMA is an effective  
534 differentiation agent to obtain mature THP-1 monocyte-derived macrophages with  
535 similarities to PBMC monocyte-derived macrophages <sup>19</sup>. There are notable advantages

536 in the use of THP1-derived macrophages over PBMC-derived macrophages: easy  
 537 acquisition and handling, unlimited cell number, homogeneous genetic/epigenetic  
 538 backgrounds, and purity of macrophage population<sup>20</sup>. Thus, in our study, we treated  
 539 the THP1 monocytes with PMA to generate macrophage-like cells, and identified the  
 540 crucial role of m<sup>6</sup>A in regulating macrophage homeostasis in humans. We have added  
 541 these data to the revised Supplementary information.

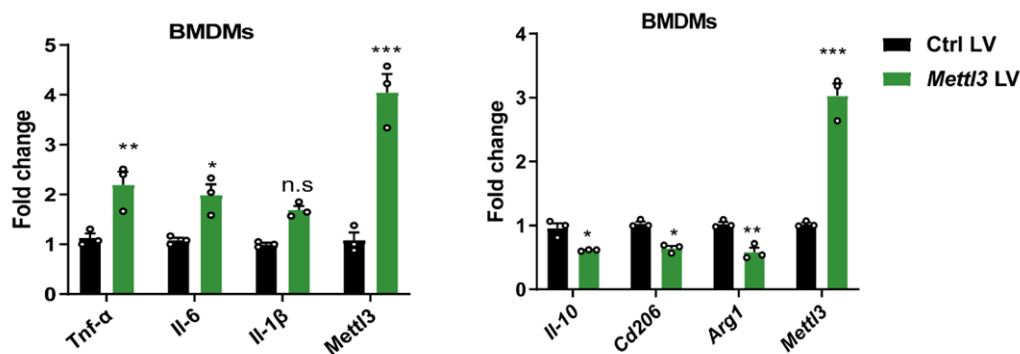

542  
 543 **Figure R11. Overexpressed *Mettl3* enhances M1 and inhibits M2 macrophage**  
 544 **activation in BMDMs.** Overexpression of *Mettl3* in BMDMs with *Mettl3* LV or Ctrl  
 545 LV. M1 (left)-and M2 (right)-associated markers were quantified by RT-qPCR in  
 546 macrophages stimulated with LPS or IL-4, respectively. Data are presented as means ±  
 547 SEM from three independent experiments. \**P* < 0.05, \*\**P* < 0.01, \*\*\**P* < 0.001; n.s =  
 548 not significant.

549

550 *7) What do the authors mean by 'gain of function' experiments? Do they mean*  
 551 *overexpression? What are the baseline Mettl3 levels in these cells?*

552 Response:

553 Thanks for the reviewer's comments. In our study, the "gain-of-function" studies mean  
 554 the overexpression of *METTL3* in BMDMs and human THP1-derived macrophages. A  
 555 higher level of *Mettl3* relative to β-actin was detected in BMDMs, while *Mettl3* LV  
 556 markedly enhanced the expression of *Mettl3* (Figure R12).

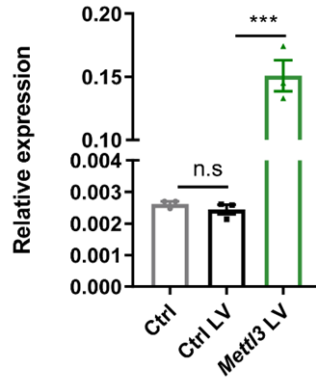

557

558 **Figure R12. The levels of *Mettl3* in BMDMs.** In WT mice, RT-qPCR showed the  
 559 levels of *Mettl3* relative to  $\beta$ -actin in BMDMs treated with *Mettl3* LV or controls. \*\*\* $P$   
 560  $< 0.001$ ; n.s = not significant.

561

562 *8) The authors propose that *Mettl3* deficiency skewed macrophages towards an M2-*  
 563 *like phenotype through decreasing NF- $\kappa$ B levels and increasing and activating*  
 564 *PI3K/AKT and JAK/STAT6 signaling. This statement is not correct. In order to show*  
 565 *this, the authors need to inhibit PI3K/AKT and JAK/STAT6 and/or activate NF $\kappa$ B and*  
 566 *see a reversal of the phenotype.*

567 Response:

568 We sincerely appreciate the reviewer's reminder. To investigate whether the role of  
 569 METTL3 in M2 macrophage activation is dependent on PI3K/AKT and JAK/STAT6  
 570 signaling, we repressed the activation of AKT and STAT6 proteins in BMDMs from  
 571 WT and *Mettl3* KO mice, using the AKT inhibitor, GSK690693, and the STAT6  
 572 inhibitor, AS1517499, respectively <sup>21, 22</sup>. The rescue experiments demonstrated that  
 573 *Mettl3* deficiency enhanced M2-associated genes levels, whereas the inhibition of AKT  
 574 or STAT6 phosphorylation levels eliminated this effect (Figure R13), implying the role  
 575 of *METTL3* in M2 macrophage activation dependent on PI3K/AKT and JAK/STAT6  
 576 signaling. We have added these data (Figure R13A) to the revised Supplementary  
 577 information.

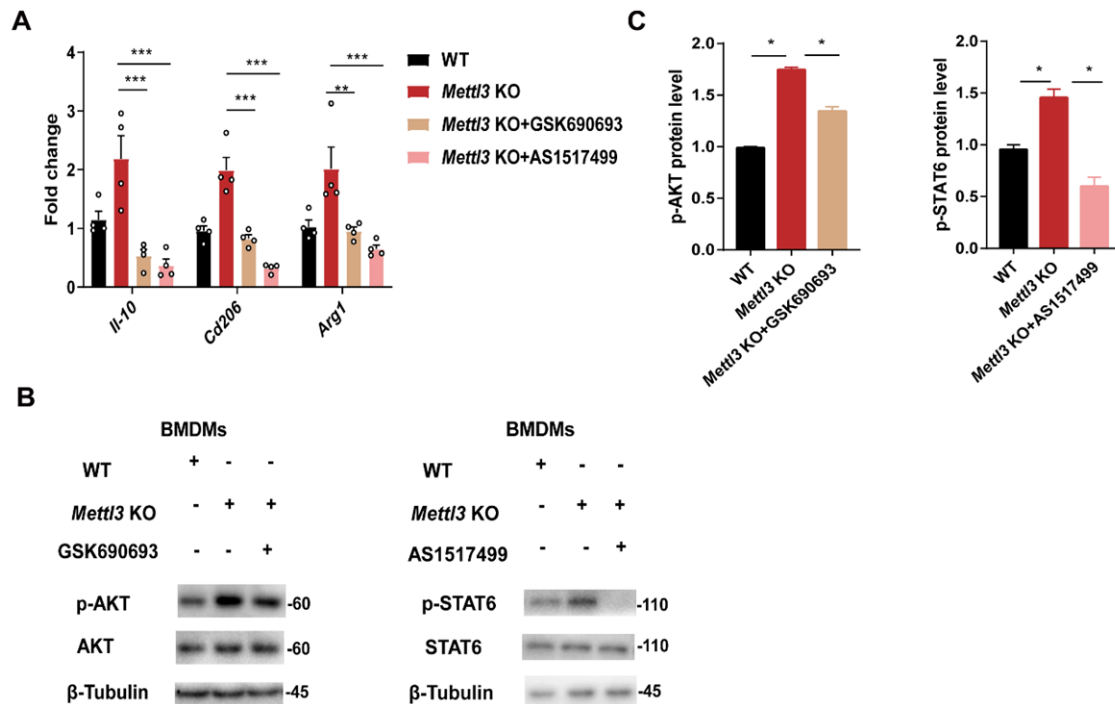

578

579 **Figure R13. The effect of METTL3 in M2 macrophage activation is dependent on**  
 580 **PI3K/AKT and JAK/STAT6 signaling.** (A) In WT and *Mettl3* mice, RT-qPCR  
 581 detected M2-associated markers expression in BMDMs treated with the AKT inhibitor  
 582 GSK690693 (100 nM), or the STAT6 inhibitor AS1517499 (100 nM). (B) (C) Western  
 583 blot showing levels of p-AKT and p-STAT6 in these cells. Data are presented as means  
 584  $\pm$  SEM from three independent experiments. \* $P < 0.05$ , \*\* $P < 0.01$ , \*\*\* $P < 0.001$

585

586 *9) In line 222 (and in other parts of the manuscript) the authors state that Mettl3*  
 587 *deficiency aggravated allergic airway disease phenotype through skewing*  
 588 *macrophages towards M2-like cells. However, they only show association data. To*  
 589 *definitely prove this they need to either transfer Mettl3-/- airway-infiltrating*  
 590 *macrophages in naive mice and see exacerbation of airway inflammation or they need*  
 591 *to deplete M2 macrophages in Mettl3-/- and see disease amelioration.*

592 Response:

593 We greatly appreciate the reviewer's valuable suggestion. To address this question, the  
 594 ideal model is to validate it by transferring *Mettl3* KO mice macrophages in naive mice.  
 595 However, due to the limited time, to confirm whether the role of METTL3 in airway



596 inflammation is due to macrophage-intrinsic effect, we depleted macrophages in vivo  
 597 using clodronate-containing liposomes (CLs)<sup>11,23</sup>. In the CRE-induced asthma model,  
 598 flow cytometry analysis confirmed a significant decrease in the percentage of alveolar  
 599 macrophages in BALF from *Mettl3* KO mice treated with CLs, compared to controls  
 600 (PBS)-treated *Mettl3* KO mice (Figure R14A). In addition, depletion of macrophages  
 601 completely reversed the susceptibility of *Mettl3* KO mice to allergic airway  
 602 inflammation, compared with wild-type animals (Figure R14B-E), suggesting that the  
 603 vital role of METTL3 in airway inflammation is dependent on macrophages. We have  
 604 added these data to the revised Figure 2.

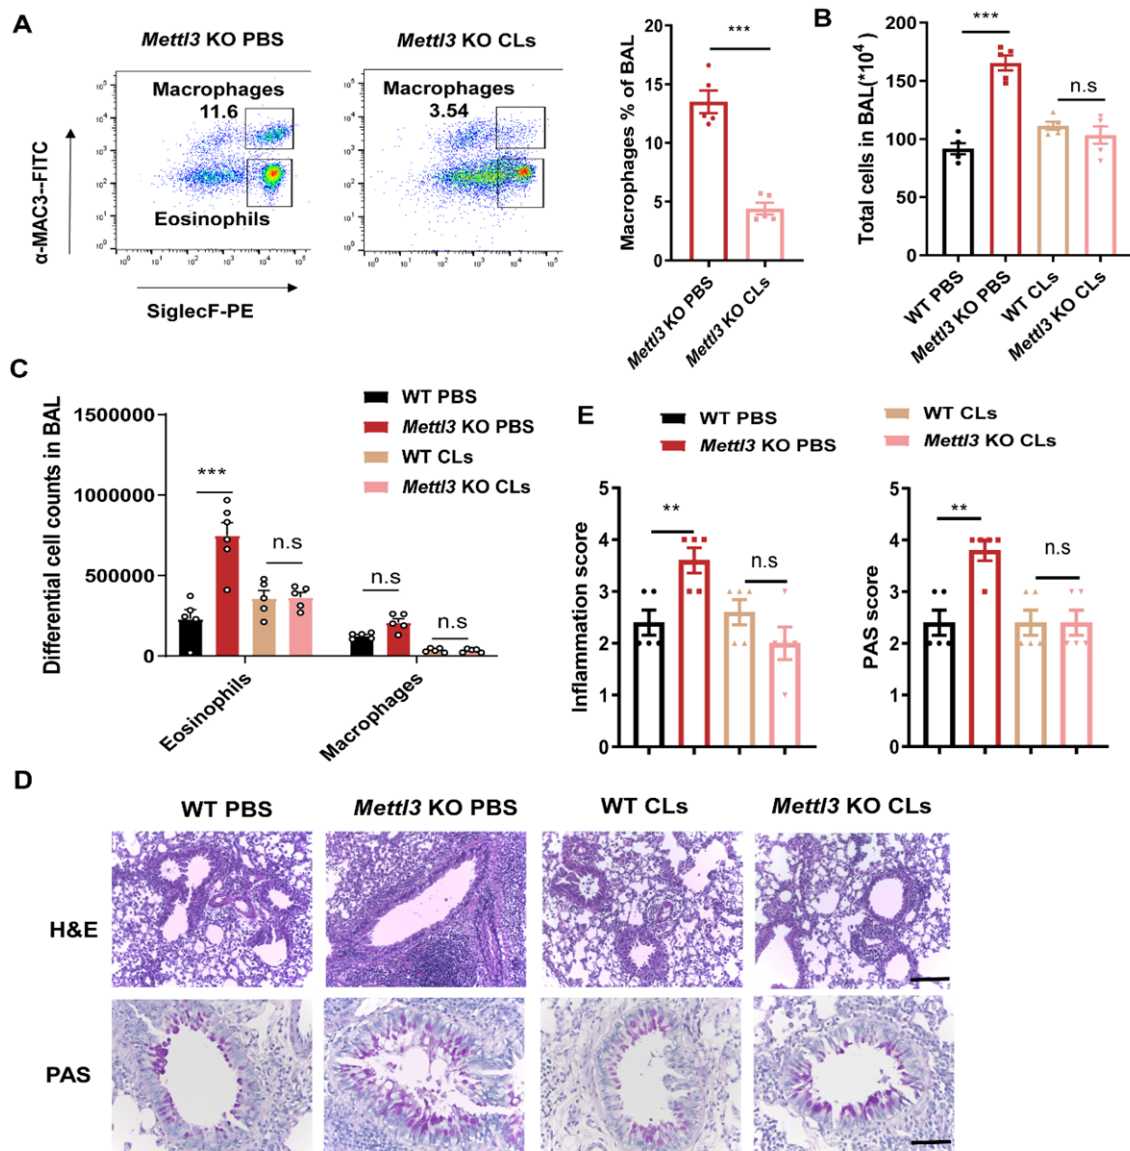

605

606 **Figure R14. The effect of METTL3 on airway inflammation is dependent on**

607 **macrophages.** Every 72 h during CRE treatment, CLs-liposome (200  $\mu$ l) was  
608 administered intratracheally in the clodronate group and PBS was administered in the  
609 control group. (A) Flow cytometry analysis of the efficiency of macrophage depletion  
610 in BALF from *Mettl3* KO mice by clodronate treatment. (B) Total and (C) differential  
611 BALF cell numbers from experimental animals were analyzed by flow cytometry. (D)  
612 Histopathological changes in the lung tissues were examined by H&E- and PAS-  
613 staining. Scale bars: 200  $\mu$ m and 100  $\mu$ m, respectively. (E) Calculated inflammation  
614 and PAS scores. Data are presented as means  $\pm$  SEM and representative of two  
615 independent experiments. \* $P < 0.05$ , \*\* $P < 0.01$ , \*\*\* $P < 0.001$ ; n.s = not significant.

616

617 *10) In line 293, the authors state that 'the upregulation of PTX3 was responsible for the*  
618 *preferential M2 macrophage activation seen in METTL3 deficient macrophages'. To*  
619 *validate this statement, the authors should knockdown PTX3 in Mettl3-/- cells and see*  
620 *reversal of the M2 characteristics.*

621 Response:

622 We sincerely appreciate the reviewer's valuable suggestion. Here, the rescue studies  
623 demonstrated that the M2-associated genes levels, the *Ptx3* mRNA levels, and the  
624 phosphorylation levels of AKT and STAT6 proteins were increased in BMDMs from  
625 *Mettl3* KO mice, whereas this enhanced effect of *Mettl3* deficiency on M2 macrophage  
626 activation was markedly abolished by *Ptx3* knockdown (Figure R15), indicating that  
627 the upregulation of PTX3 was responsible for the preferential M2 macrophage  
628 activation seen in *Mettl3*-deficient macrophages. We have added these data (Figure  
629 R15A) to the revised Figure 5.

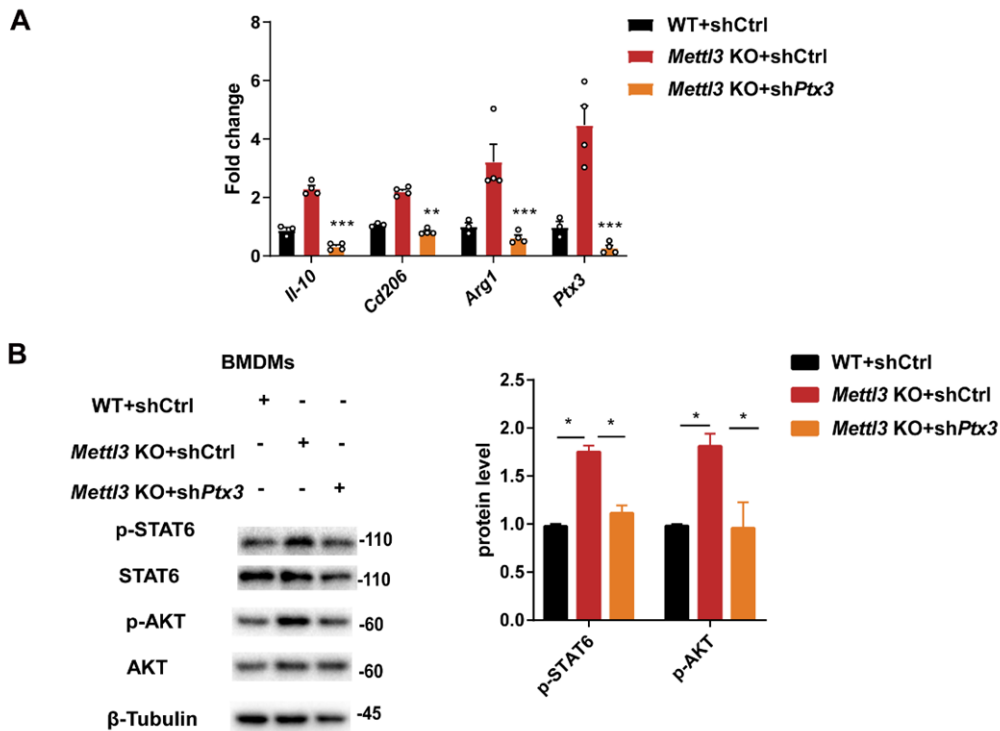

630

631 **Figure R15. The enhanced effect of METTL3 deficiency on M2 macrophage**

632 **activation is dependent on PTX3.** (A) RT-qPCR (B) and Western blot showing M2

633 activation-associated markers expression in BMDMs from WT and *Mettl3* KO mice,

634 with or without *Ptx3* knockdown. Data are presented as means  $\pm$  SEM. \* $P < 0.05$ , \*\*\* $P$

635  $< 0.001$ .

636

637 *11) Administration of a lentivirus is expected to infect all cells in the lung and not*

638 *specifically alveolar macrophages. The authors should show that knockdown of PTX3*

639 *specifically in macrophages ameliorates disease phenotype in *Mettl3*<sup>-/-</sup> mice.*

640 Response:

641 We sincerely appreciate the reviewer's valuable suggestion. To address this question,

642 the ideal model is to validate it using *Ptx3* /*Mettl3* macrophage-specific knockout mice.

643 However, due to the limited time and funding, to further elucidate the role of *Ptx3*

644 knockdown in allergic airway inflammation dependent on macrophages, we depleted

645 macrophages in vivo using clodronate-containing liposomes (CLs). Similar to our

646 findings in *Mettl3* KO mice, the percentage of alveolar macrophages was significantly

647 reduced in BALF from *Ptx3* knockdown mice treated with CLs, compared to controls

648 (PBS)-treated *Ptx3* knockdown mice (Figure R16A). Furthermore, the data showed that  
 649 compared to shCtrl–infected mice, *Ptx3* knockdown in vivo noticeably alleviated the  
 650 CRE-induced allergic airway inflammation. However, we found that, through the  
 651 depletion of macrophages using CLs, there was no significant difference in airway  
 652 inflammation between sh*Ptx3*–treated mice (sh*Ptx3* CLs) and shCtrl–mice (shCtrl CLs)  
 653 (Figure R16B-E), suggesting that the role of *Ptx3* knockdown in allergic airway  
 654 inflammation may be due to macrophages. We have added these data to the revised  
 655 Supplementary information and discussed the limitation in the discussion section.

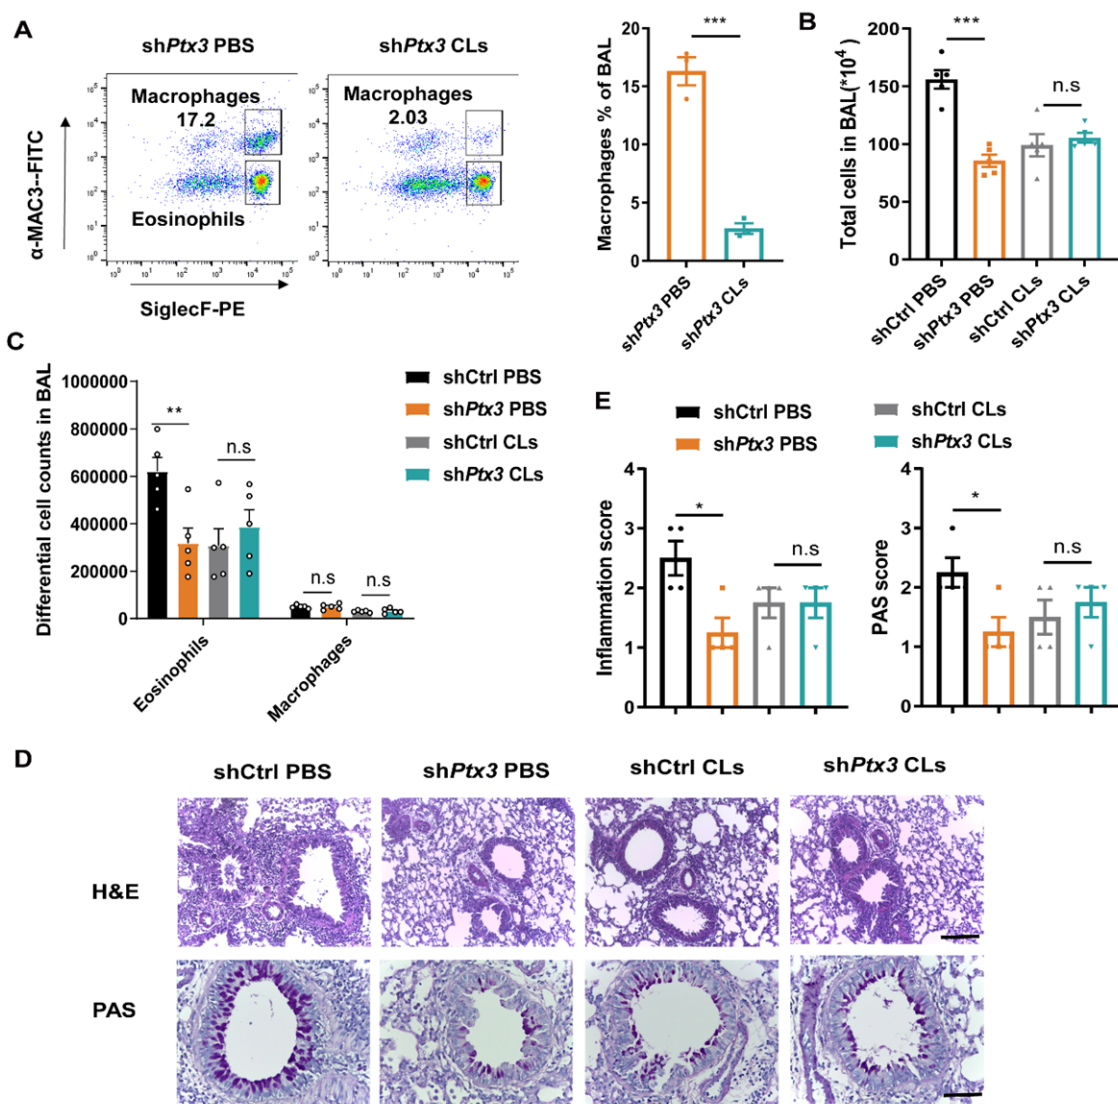

656

657 **Figure R16. The effect of PTX3 on airway inflammation is dependent on**  
 658 **macrophages.** Every 72 h during CRE treatment, CLs-liposome (200 μl) was  
 659 administered intratracheally in the clodronate group and PBS was administered in the



660 control group. The sh*Ptx3* lentivirus or shCtrl virus was administered by intratracheal  
 661 instillation on day 14. (A) Flow cytometry analysis of the efficiency of macrophage  
 662 depletion in BALF from sh*Ptx3*-treated mice by clodronate treatment. (B) Total and  
 663 (C) differential BALF cell numbers from experimental animals were analyzed by flow  
 664 cytometry. (D) Histopathological changes in the lung tissues were examined by H&E-  
 665 and PAS-staining. Scale bars: 200  $\mu\text{m}$  and 100  $\mu\text{m}$ , respectively. (E) Calculated  
 666 inflammation and PAS scores. Data are presented as means  $\pm$  SEM and representative  
 667 of two independent experiments. \* $P < 0.05$ , \*\* $P < 0.01$ , \*\*\* $P < 0.001$ ; n.s = not  
 668 significant.

669

670 *12) In figures 1 and 4, better quality histology microphotographs of H&E and PAS*  
 671 *staining should be provided.*

672 Response:

673 Thanks for the reviewer's reminder. We have provided the higher magnification of  
 674 histology microphotographs in the revised manuscript as follows (Figure R17).

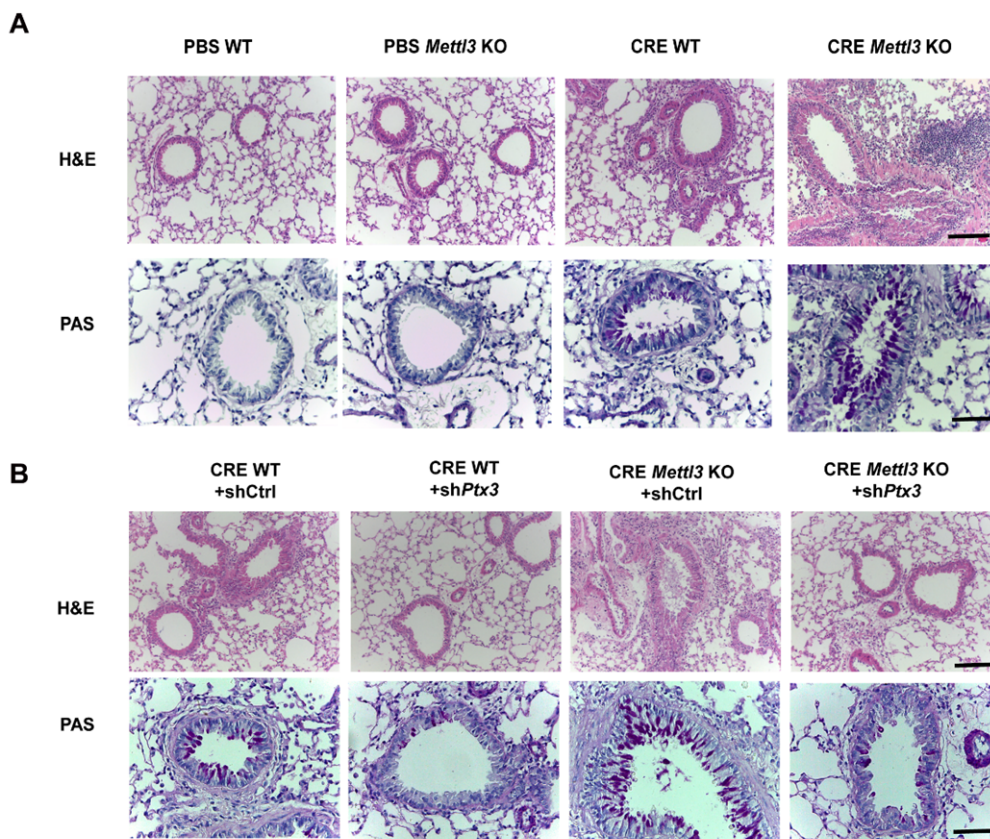

675

676 **Figure R17. Representative histology microphotographs in experimental animals.**

677 Scale bars: H&E staining 200  $\mu$ m, and PAS staining 100  $\mu$ m, respectively.

678

679 *13) In the immunostaining experiments in Figures 2 and 4, CD206+F4/80+ expressing*  
680 *macrophages are not clearly shown. Higher magnifications should be provided. In*  
681 *Figure 4, PTX3 expressing M2 macrophages are also not clearly shown and higher*  
682 *magnifications should be provided.*

683 Response:

684 Thanks for the reviewer's reminder. We have provided the higher magnification of  
685 microphotographs in the revised manuscript as follows (Figure R18).

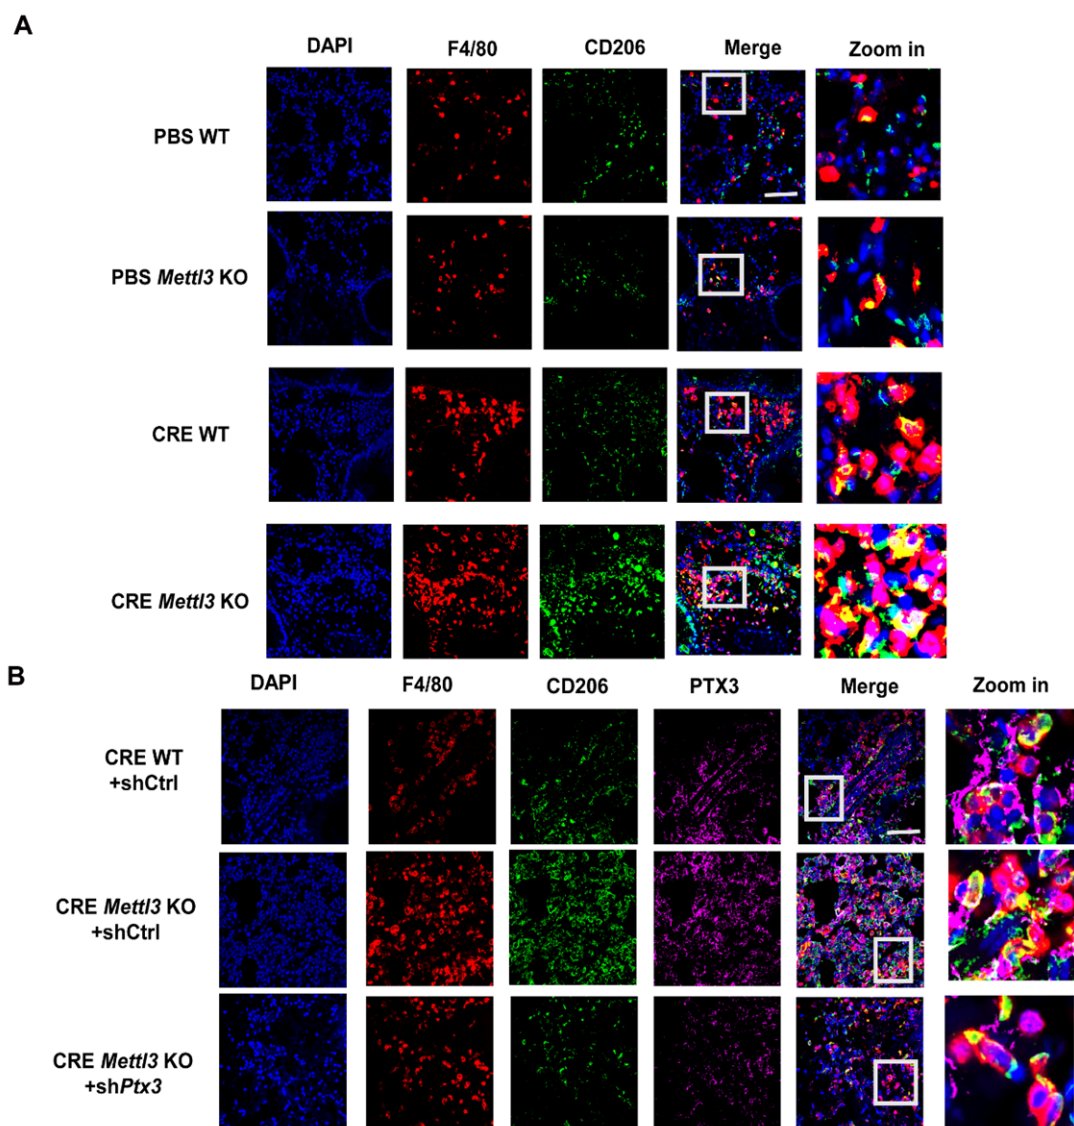

686

687 **Figure R18. Representative immunofluorescence staining in experimental animals.**

688 Scale bars: 25µm.

689

690 *14) It is not clear from the introduction why the authors chose to explore childhood*  
691 *asthma.*

692 Response:

693 Thanks for the reviewer's reminder. We have added this description in the Introduction  
694 as follows:

695 "Allergic asthma is the most common clinical phenotypes of asthma. Notably, most  
696 school-age children have allergic asthma, which has often obvious involvement in the  
697 immune system such as eosinophils and type 2 helper T cells (Th2 cells) <sup>6</sup>. Children  
698 with allergic asthma have concomitant allergic sensitization, which has been associated  
699 with asthma inception and severity".

700

701 *15) A concise hypothesis is missing.*

702 Response:

703 Thanks for the reviewer's reminder. We have added the concise hypothesis in the  
704 discussion as follows:

705 "Collectively, this study highlights the critical role of METTL3 deficiency in the  
706 pathogenesis of allergic asthma airway inflammation, as featured by promoting M2  
707 macrophage activation and enhancing Th2 response, and uncovers a previously  
708 unrecognized signaling axis involving METTL3/YTHDF3-m<sup>6</sup>A/PTX3/STX17 in  
709 macrophage activation and autophagy maturation."

710

711 *16) Certain references are missing (i.e. line 87).*

712 Response:

713 Thanks for the reviewer's reminder. We have added these references to support this  
714 conclusion <sup>24, 25</sup>.

715

716 *17) The manuscript would benefit from revision by an English native speaker.*

717 Response:

718 Thanks for your suggestion. We have tried our best to polish the language and also  
719 involved native English speakers for language corrections in the revised manuscript.

720

## 721 **References**

- 722 1. Linder B, Grozhik AV, Olarerin-George AO, Meydan C, Mason CE, Jaffrey SR.  
723 Single-nucleotide-resolution mapping of m6A and m6Am throughout the  
724 transcriptome. *Nat Methods* **12**, 767-772 (2015).  
725
- 726 2. Wang JN, *et al.* Inhibition of METTL3 attenuates renal injury and inflammation  
727 by alleviating TAB3 m6A modifications via IGF2BP2-dependent mechanisms.  
728 *Sci Transl Med* **14**, eabk2709 (2022).  
729
- 730 3. Liu J, *et al.* Landscape and Regulation of m(6)A and m(6)Am Methylome across  
731 Human and Mouse Tissues. *Mol Cell* **77**, 426-440 e426 (2020).  
732
- 733 4. Xiao Y, Wang Y, Tang Q, Wei L, Zhang X, Jia G. An Elongation- and Ligation-  
734 Based qPCR Amplification Method for the Radiolabeling-Free Detection of  
735 Locus-Specific N(6) -Methyladenosine Modification. *Angew Chem Int Ed Engl*  
736 **57**, 15995-16000 (2018).  
737
- 738 5. Xu W, *et al.* METTL3 regulates heterochromatin in mouse embryonic stem cells.  
739 *Nature* **591**, 317-321 (2021).  
740
- 741 6. Lambrecht BN, Hammad H. The immunology of asthma. *Nat Immunol* **16**, 45-  
742 56 (2015).  
743
- 744 7. Zhang M, *et al.* Epithelial exosomal contactin-1 promotes monocyte-derived  
745 dendritic cell-dominant T-cell responses in asthma. *J Allergy Clin Immunol* **148**,  
746 1545-1558 (2021).  
747
- 748 8. Saradna A, Do DC, Kumar S, Fu QL, Gao P. Macrophage polarization and  
749 allergic asthma. *Transl Res* **191**, 1-14 (2018).  
750
- 751 9. Biswas SK, Mantovani A. Macrophage plasticity and interaction with  
752 lymphocyte subsets: cancer as a paradigm. *Nature Immunology* **11**, 889-896  
753 (2010).  
754
- 755 10. Staples KJ, Hinks TS, Ward JA, Gunn V, Smith C, Djukanovic R. Phenotypic  
756 characterization of lung macrophages in asthmatic patients: overexpression of  
757 CCL17. *J Allergy Clin Immunol* **130**, 1404-1412 (2012).  
758



- 759 11. He J, *et al.* Fbxw7 increases CCL2/7 in CX3CR1hi macrophages to promote  
760 intestinal inflammation. *J Clin Invest* **129**, 3877-3893 (2019).  
761
- 762 12. Bain CC, MacDonald AS. The impact of the lung environment on macrophage  
763 development, activation and function: diversity in the face of adversity. *Mucosal*  
764 *Immunol* **15**, 223-234 (2022).  
765
- 766 13. McQuattie-Pimentel AC, Budinger GRS, Ballinger MN. Monocyte-derived  
767 Alveolar Macrophages: The Dark Side of Lung Repair? *Am J Respir Cell Mol*  
768 *Biol* **58**, 5-6 (2018).  
769
- 770 14. GINA. 2022 GINA Report, Global Strategy for Asthma Management and  
771 Prevention. ([https://ginasthma.org/gina-reports/.](https://ginasthma.org/gina-reports/)) (2022).  
772
- 773 15. Reddel HK, *et al.* An official American Thoracic Society/European Respiratory  
774 Society statement: asthma control and exacerbations: standardizing endpoints  
775 for clinical asthma trials and clinical practice. *Am J Respir Crit Care Med* **180**,  
776 59-99 (2009).  
777
- 778 16. Custovic A, Siddiqui S, Saglani S. Considering biomarkers in asthma disease  
779 severity. *J Allergy Clin Immunol* **149**, 480-487 (2022).  
780
- 781 17. Price DB, *et al.* Blood eosinophil count and prospective annual asthma disease  
782 burden: a UK cohort study. *Lancet Respir Med* **3**, 849-858 (2015).  
783
- 784 18. Pham TH, Damera G, Newbold P, Ranade K. Reductions in eosinophil  
785 biomarkers by benralizumab in patients with asthma. *Respir Med* **111**, 21-29  
786 (2016).  
787
- 788 19. Shiratori H, *et al.* THP-1 and human peripheral blood mononuclear cell-derived  
789 macrophages differ in their capacity to polarize in vitro. *Mol Immunol* **88**, 58-  
790 68 (2017).  
791
- 792 20. Chanput W, Mes JJ, Wichers HJ. THP-1 cell line: an in vitro cell model for  
793 immune modulation approach. *Int Immunopharmacol* **23**, 37-45 (2014).  
794
- 795 21. Levy DS, Kahana JA, Kumar R. AKT inhibitor, GSK690693, induces growth  
796 inhibition and apoptosis in acute lymphoblastic leukemia cell lines. *Blood* **113**,  
797 1723-1729 (2009).  
798
- 799 22. Binnemars-Postma K, Bansal R, Storm G, Prakash J. Targeting the Stat6  
800 pathway in tumor-associated macrophages reduces tumor growth and metastatic  
801 niche formation in breast cancer. *FASEB J* **32**, 969-978 (2018).  
802

- 803 23. Arranz A, *et al.* Akt1 and Akt2 protein kinases differentially contribute to  
804 macrophage polarization. *Proc Natl Acad Sci U S A* **109**, 9517-9522 (2012).  
805
- 806 24. Liu J, *et al.* N-6-methyladenosine of chromosome-associated regulatory RNA  
807 regulates chromatin state and transcription. *Science* **367**, 580-586 (2020).  
808
- 809 25. Yu R, Li Q, Feng Z, Cai L, Xu Q. m6A Reader YTHDF2 Regulates LPS-  
810 Induced Inflammatory Response. *Int J Mol Sci* **20**, (2019).  
811  
812

## REVIEWER COMMENTS

### **Reviewer #1 (Remarks to the Author):**

The authors addressed most of my concerns by adding a substantial amount of new data. I still believe that the quality of the meRIP-seq datasets is sub-optimal but the validation of the m6A site in the 3'UTR of PTX3 by an independent approach is convincing enough to validate the model. I therefore support publication

### **Reviewer #2 (Remarks to the Author):**

The authors have been quite responsive to the reviewers' comments. I will allow Reviewer's 1 and 3 to comment on the responses to their critiques. In the response to my critiques, the authors performed the requested experiments, but I am very concerned about the response to my third comment regarding the statistical analysis that the authors performed. They state "Thus, to make the result more convincible, we excluded these outliers, and recruited another fifteen new children with allergic asthma and ten healthy controls." This is certainly not what I was suggesting or would have recommended when I suggested about using a non-parametric test because the data was not normally distributed. No data should have been excluded in the analysis, certainly not the "outliers" as the authors term that data. In addition, the goal of data analysis is not to make the results "more convincible" but instead to accurately reflect the true biology. The addition of more study subjects to achieve greater statistical significance is also a major concern and I suggest that a biostatistician should review this manuscript.

### **Reviewer #4 (Remarks to the Author):**

The authors provided extensive revision to the manuscript, adding additional data to reinforce and support key statements made in the manuscript. These new data sufficiently address the comments.

Additional Comments:

1) It is important to confirm that proper experimental controls for flow cytometry were

used. Was a live/dead exclusion marker utilized? If so, the methods section for flow cytometry data should be revised to reflect the use of proper controls. It should also include how the gating of intracellular cytokine markers were performed (ex. FMO controls). Additionally, the use of live/dead exclusion markers and Fc block should be added to the methods section. These items are very important for rigor and reproducibility of data.

1 Point-by-point responses

2 To Reviewer: 2

3

4 *The authors have been quite responsive to the reviewers' comments. I will allow*  
5 *Reviewer's 1 and 3 to comment on the responses to their critiques. In the response to*  
6 *my critiques, the authors performed the requested experiments, but I am very concerned*  
7 *about the response to my third comment regarding the statistical analysis that the*  
8 *authors performed. They state " Thus, to make the result more convincible, we*  
9 *excluded these outliers, and recruited another fifteen new children with allergic asthma*  
10 *and ten healthy controls. " This is certainly not what I was suggesting or would have*  
11 *recommended when I suggested about using a non-parametric test because the data*  
12 *was not normally distributed. No data should have been excluded in the analysis,*  
13 *certainly not the " outliers " as the authors term that data. In addition, the goal of*  
14 *data analysis is not to make the results " more convincible " but instead to*  
15 *accurately reflect the true biology. The addition of more study subjects to achieve*  
16 *greater statistical significance is also a major concern and I suggest that a*  
17 *biostatistician should review this manuscript.*

18 Response:

19 We are really sorry for our misunderstanding the reviewer's previous comments "All  
20 the correlation analyses should be performed using the appropriate statistical test and it  
21 appears that these correlations may not be significant as they are being driven by a very  
22 few values at the extremes of the data set in several of the analyses." In the previous  
23 manuscript, after the data on childhood asthma were tested to be non-Gaussian  
24 distribution and analyzed by Spearman correlation, we excluded the outliers to achieve  
25 greater statistical significance, while this analysis couldn't accurately reflect the true  
26 biology. We are really sorry for this mistake, and greatly appreciate the reviewer's  
27 comments again.

28 Here, in statistical analysis, all results in the manuscript were tested for Gaussian  
29 distribution and homogeneity variance. For data in Gaussian distribution and with

30 homogeneity variance, parametric test was used to analyze, such as independent t-test,  
31 one or two-way ANOVA, etc. For data in non-Gaussian distribution, non-parametric  
32 test was used to analyze, such as the Mann-Whitney test, Spearman correlation, etc. For  
33 data in Gaussian distribution and without homogeneity variance, Welch's correction  
34 was used. In the revised manuscript, we have amended these descriptions in the  
35 statistical analysis. We also have presented the source data and information of statistical  
36 analysis in the Source Data file.

37 Furthermore, we checked again the clinical information on 55 childhood asthma. The  
38 data on childhood asthma were tested to be non-Gaussian distribution. To accurately  
39 reflect the true biology, we re-performed the Spearman correlation analysis without  
40 excluding the outliers (a total of 55 asthma patients). The results suggested that the  
41 expression of *METTL3* in monocyte-derived macrophages, or the *PTX3* circulating  
42 levels from 55 asthma patients slightly lowered the correlation with disease severity,  
43 compared to the previous 50 asthma patients, nevertheless, this analysis didn't change  
44 our original conclusion. Furthermore, we found this correlation in 55 childhood asthma  
45 was relatively higher than that in the original 40 patients (Figure R1).

46 Thus, more childhood asthma patients are needed to confirm the findings reported  
47 herein. However, since it is difficult to recruit more childhood asthma due to the limited  
48 time and funding, we further added the limitation of this analysis in the revised  
49 discussion as follows: "Importantly, large cohorts of childhood allergic asthma need to  
50 be constructed, which evaluate the possibility of *METTL3* or *PTX3* levels as potential  
51 biomarker for the diagnosis and assessment of childhood allergic asthma."

52 Here, we have renewed the data from 55 childhood asthma and amended the  
53 descriptions in the revised manuscript. We also presented the source data of 55, 50, and  
54 original 40 childhood asthma and information on statistical analysis in the Source Data  
55 file.

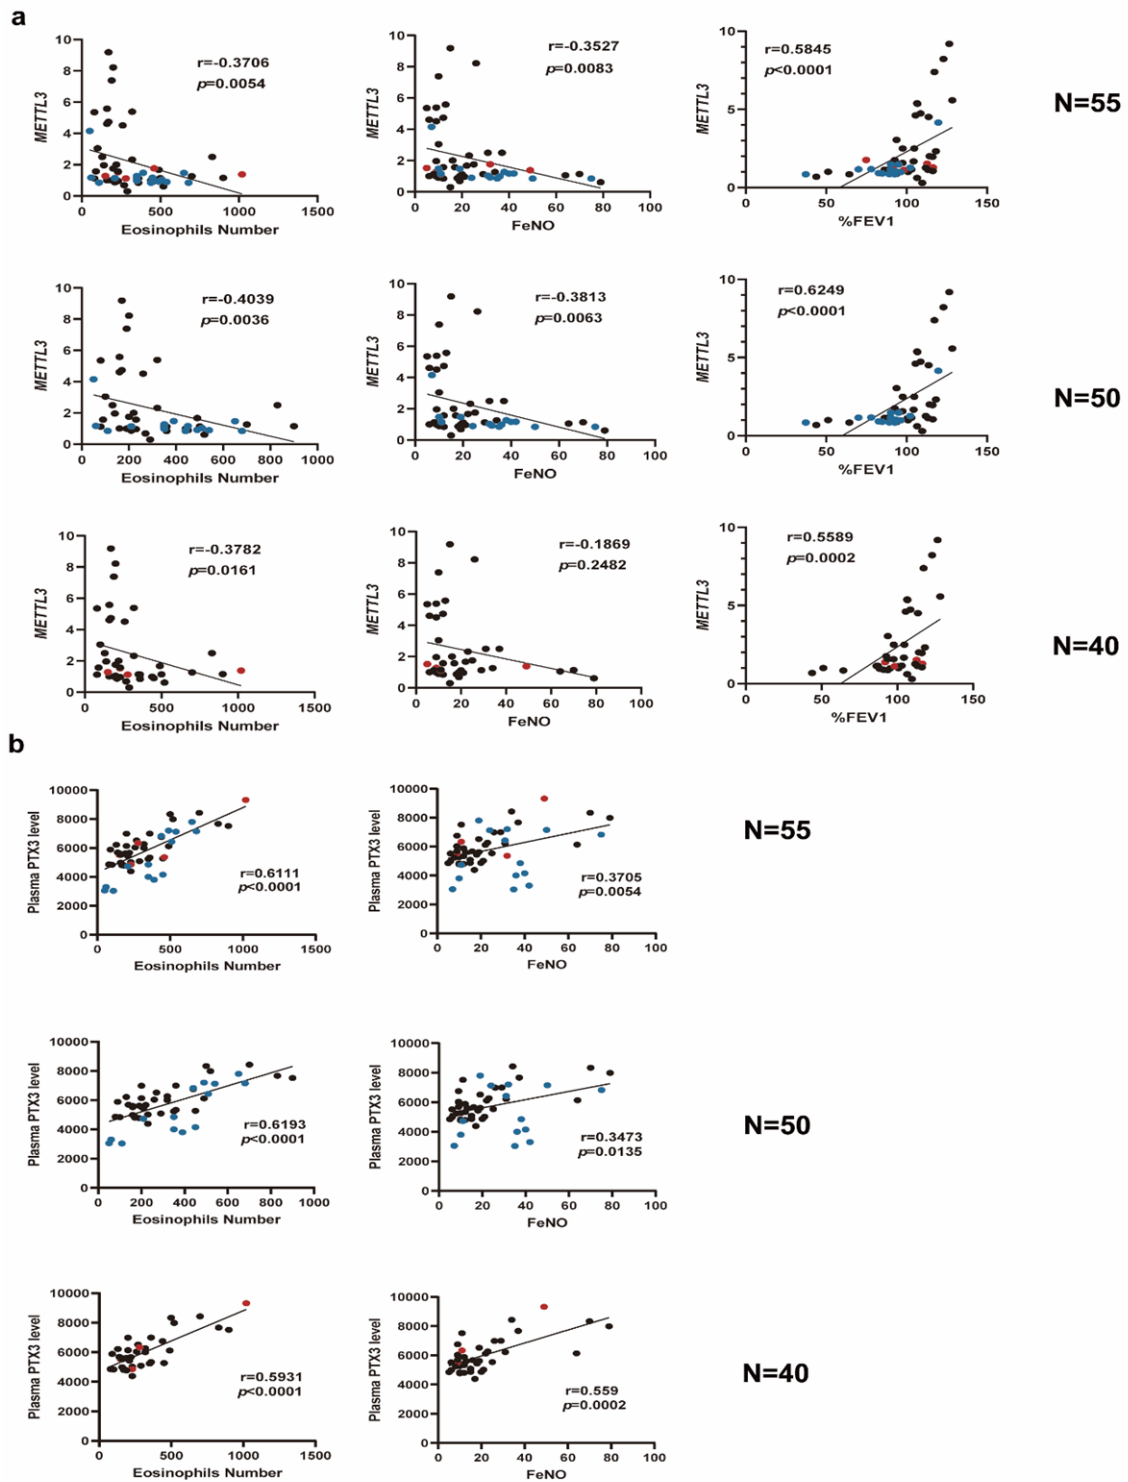

56

57 **Figure R1. Clinical correlation between METTL3, PTX3 and disease severity in**  
 58 **childhood allergic asthma. (a) Spearman correlation analysis of monocyte-derived**  
 59 **macrophages *METTL3* expression, blood eosinophils number, FeNO, and %FEV<sub>1</sub>**  
 60 **levels in 55, 50, and original 40 childhood asthma, respectively. (b) Spearman**  
 61 **correlation analysis between PTX3 protein levels and blood eosinophils numbers, or**  
 62 **FeNO in 55, 50, and original 40 childhood asthma, respectively. Red represented the 5**

63 excluded patients and Blue represented the 14 added patients in the previous Figure.

64

65 To Reviewer: 4

66

67 *The authors provided extensive revision to the manuscript, adding additional data to*  
68 *reinforce and support key statements made in the manuscript. These new data*  
69 *sufficiently address the comments.*

70 Response:

71 We thank the reviewer for carefully reading our manuscript and appreciate the helpful  
72 comments and critical questions. Based on these suggestions and questions, we have  
73 made changes to the original manuscript to improve our manuscript. We hope that the  
74 revised manuscript will be better for the readers to understand our points and finally  
75 meet with your approval to get published.

76

77 *1) It is important to confirm that proper experimental controls for flow cytometry were*  
78 *used. Was a live/dead exclusion marker utilized? If so, the methods section for flow*  
79 *cytometry data should be revised to reflect the use of proper controls. It should also*  
80 *include how the gating of intracellular cytokine markers were performed (ex. FMO*  
81 *controls). Additionally, the use of live/dead exclusion markers and Fc block should be*  
82 *added to the methods section. These items are very important for rigor and*  
83 *reproducibility of data.*

84 Response:

85 We sincerely appreciate the reviewer's reminder. In flow cytometry, cells were stained  
86 with Fixable Viability Stain 780 (FSV780, BD Biosciences) to identify viable cells,  
87 which have less staining with the fixable viability dye. Then, the cells were incubated  
88 with an anti-CD16/32 monoclonal antibody (eBioscience) to prevent the non-specific  
89 binding of antibodies to Fc receptors on immune cells. For the gating of intracellular  
90 cytokines markers, cells were stained with surface markers antibodies, fixed and  
91 permeabilized, followed by incubated with isotype control and various cytokine  
92 antibodies, respectively. The isotype control plot was used to set the gates of



93 intracellular cytokines (Figure R2).  
94 Here, we have added the following description in the Methods: “Cells were stained with  
95 Fixable Viability Stain 780 (BD Biosciences) and then incubated with an anti-CD16/32  
96 monoclonal antibody (ebioscience).” “For the gating of intracellular cytokines markers,  
97 cells were incubated with isotype control and various cytokine antibodies, respectively.  
98 The isotype control plot was used to set the gates of intracellular cytokines.” We have  
99 renewed the figure exemplifying the gating strategy in the revised Supplementary  
100 Information.

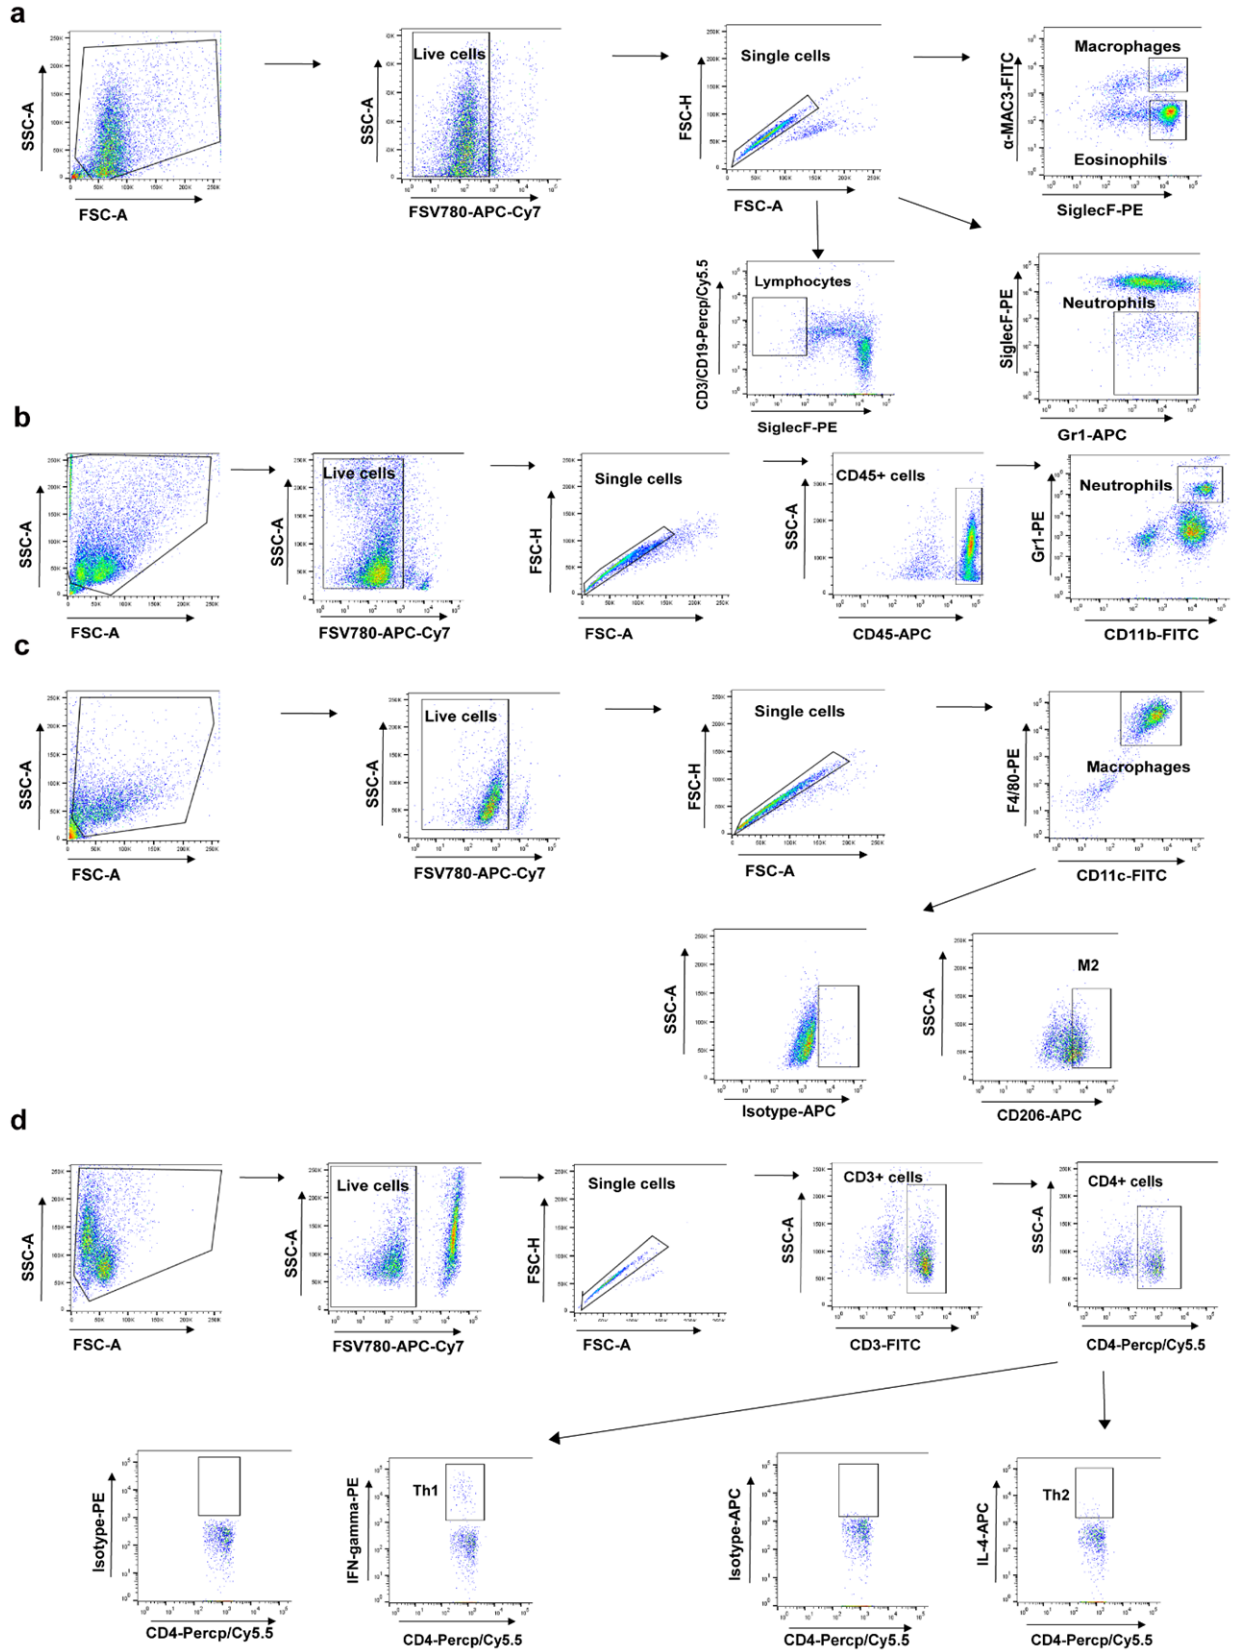

101

102 **Figure R2. Gating strategies used for flow cytometry.**

## **REVIEWERS' COMMENTS**

### **Reviewer #2 (Remarks to the Author):**

The authors have now responded appropriately to my concerns about their statistical methods.

### **Reviewer #4 (Remarks to the Author):**

Thank you for addressing all the comments.

1 We appreciate the helpful comments and constructive criticisms of the reviewers. Here,  
2 we respond point-by-point to the different questions and concerns raised by the  
3 reviewers.

4

## 5 Point-by-point responses

6 To Reviewer: 2

7

8 *The authors have now responded appropriately to my concerns about their statistical*  
9 *methods.*

10 Response:

11 We sincerely appreciate the reviewer for the helpful comments on our study, and we  
12 thank him/her for the positive response.

13

14 To Reviewer: 4

15

16 *Thank you for addressing all the comments.*

17 Response:

18 We sincerely appreciate the reviewer for the helpful comments on our study, and we  
19 thank him/her for the positive response.

20

21

22

23

24

25

26
